# Supplementary material for: Precise control of the site selectivity in ruthenium-catalyzed C–H bond amidations using cyclic amides as powerful directing groups
Source: Royal Society of Chemistry journal article supplement (doi:10.1039/d2qo01434c), 2022-11-05

## Supporting Information

### Precise Control of the Site-Selectivity in Ruthenium-Catalyzed C-H Bond Amidations by Cyclic Amides as Powerful Directing Groups

Yu-Chao Yuan,\*<sup>a</sup> Qiu-Li Lu,<sup>a</sup> Xiao-Tong Zhu,<sup>a</sup> Sergio Posada-Pérez,<sup>b</sup>  
Miquel Solà,<sup>b</sup> Albert Poater,\*<sup>b</sup> Thierry Roisnel<sup>c</sup>  
and Rafael Gramage-Doria\*<sup>c</sup>

<sup>a</sup> Jiangsu Key Laboratory of New Drug Research and Clinical Pharmacy, School of Pharmacy, Xuzhou Medical University, Xuzhou 221004, China.  
e-mail: yuchao.yuan@xzhmu.edu.cn

<sup>b</sup> Institut de Química Computacional i Catàlisi, Departament de Química, Universitat de Girona, c/ M<sup>a</sup> Aurèlia Capmany 69, 17003 Girona, Catalonia, Spain.  
e-mail: albert.poater@udg.edu

<sup>c</sup> Univ Rennes, CNRS, ISCR – UMR6226, F-35000 Rennes, France.  
e-mail: rafael.gramage-doria@univ-rennes1.fr

## Contents

|                                                                                      |     |
|--------------------------------------------------------------------------------------|-----|
| 1. General information.....                                                          | S3  |
| 2. Synthesis and characterization of substrates 1.....                               | S4  |
| 3. Synthesis and characterization of of dioxazolones 2.....                          | S9  |
| 4. Reaction optimization (general procedure and screening).....                      | S14 |
| 5. Deuteration experiments.....                                                      | S16 |
| 6. Large-scale reaction.....                                                         | S17 |
| 7. Characterization data of products.....                                            | S18 |
| 8. Substrate limitations for the catalysis.....                                      | S28 |
| 9. References.....                                                                   | S28 |
| 10. X-ray crystallographic data for 3c (CCDC-2149748).....                           | S29 |
| 11. XYZ coordinates and absolute energies (in a.u.) of all DFT computed species..... | S39 |
| 12. NMR spectra.....                                                                 | S90 |

## 1. General information.

All reagents were obtained from commercial sources and used as supplied. All reactions were carried out in flame-dried glassware under argon atmosphere unless otherwise noted. Catalytic experiments were performed in Schlenk-type flasks under air atmosphere unless otherwise noted. Organic solutions were concentrated under reduced pressure using a rotary evaporator. Thin-layer chromatography (TLC) were carried out on 0.25 mm Merck silica gel (60-F254). Flash column chromatography was performed using silica gel Silica 60 M, 0.04-0.063 mm. Technical grade petroleum ether (40-60), *n*-heptane and ethyl acetate were used for column chromatography. CDCl<sub>3</sub> was stored under nitrogen over molecular sieves. NMR spectra were recorded on AV 300, AV 360, AVANCE III 400, JEOL ECZ400 or DRX 400 Bruker spectrometers. <sup>1</sup>H NMR spectra were referenced to residual protiated solvent ( $\delta = 7.26$  ppm for CDCl<sub>3</sub>,  $\delta = 2.50$  ppm for DMSO-*d*<sub>6</sub>) and <sup>13</sup>C chemical shifts are reported relative to deuterated solvents ( $\delta = 77.0$  ppm for CDCl<sub>3</sub>,  $\delta = 39.5$  ppm for DMSO-*d*<sub>6</sub>). The peak patterns are indicated as follows: s, singlet; d, doublet; t, triplet; q, quartet; m, multiplet, and br. for broad. HRMS were recorded on a ESI-TOF mass spectrometer. Melting points were measured on micro melting point apparatus and uncorrected.

## 2. Synthesis and characterization of substrates 1.

**2.1. Method A:** A mixture of 2-formylbenzoic acid (5.0 mmol, 1 equiv.), amine (6.0 mmol, 1.2 equiv.), DABCO (10.0 mmol, 2 equiv.), HCOOH (1.25 mL), Pd(OAc)<sub>2</sub> (0.25 mmol, 5 mol%) in 1,4-dioxane (5 mL) was heated to 80 °C for 3h. After completion of the reaction, the mixture was cooled to room temperature, and diluted with DCM (50 mL). The solid was removed by filter, and the filtrate was washed with water (50 mL) and brine (50 mL). The organic layer was dried over Na<sub>2</sub>SO<sub>4</sub>, filtered, and concentrated under reduced pressure. The residue was purified by column chromatography on silica gel (petroleum ether/acetone = 5/1, v/v) to afford the desired product.

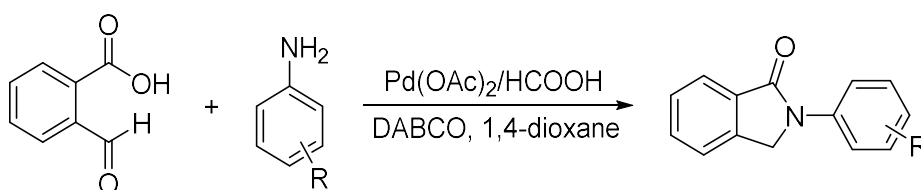

**2.3. Method B:** A mixture of 2-formylbenzoic acid (2.0 mmol), amine (2.2 mmol), and Hantzsch ester (2.4 mmol) was stirred in CH<sub>2</sub>Cl<sub>2</sub> (6 mL) at room temperature under N<sub>2</sub> until the reaction was complete (TLC analysis). A solution of saturated NaHCO<sub>3</sub> (10 mL) was added, and was extracted with EtOAc (3×20 mL). The combined organic layers were dried over anhydrous Na<sub>2</sub>SO<sub>4</sub> and concentrated to give a residue that was purified by column chromatography with petroleum/EtOAc (10:1-3:1, v/v) as an eluent.

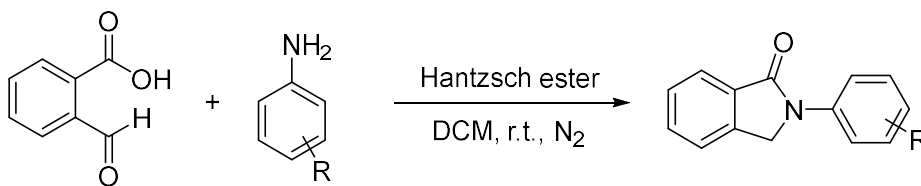

**2.2. Method C:** Phthalic anhydride (5 mmol, 0.74 g, 1 equiv.) and the corresponding aniline (5 mmol, 1 equiv.) were refluxed in acetic acid (30 mL) for 2-5 h. Once at room temperature, water was added and the solid recovered by filtration. After drying under vacuum the desired phthalimide was obtained.

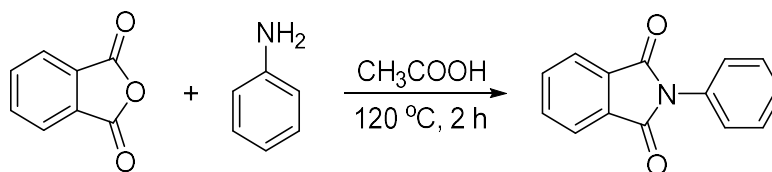

## 2.4. Characterization of substrates 1.

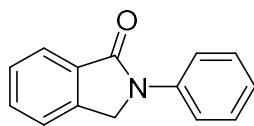

**1a**

**2-Phenylisoindolin-1-one (1a):** Prepared according to **Method A** starting from aniline in 98% isolated yield.  $^1\text{H NMR}$  (400 MHz,  $\text{CDCl}_3$ ):  $\delta = 7.93$  (d,  $J = 7.6$  Hz, 1H), 7.89-7.86 (m, 2H), 7.62-7.58 (m, 1H), 7.53-7.49 (m, 2H), 7.43 (dd,  $J = 8.4, 7.2$  Hz, 2H), 7.18 (dd,  $J = 7.2, 7.2$  Hz, 1H), 4.87 (s, 2H) ppm. The spectral data match those previously reported.<sup>1</sup>

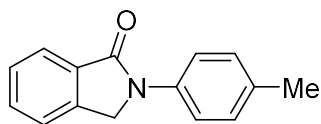

**1b**

**2-(p-Tolyl)isoindolin-1-one (1b):** Prepared according to **Method A** starting from *p*-toluidine in 80% isolated yield.  $^1\text{H NMR}$  (400 MHz,  $\text{CDCl}_3$ ):  $\delta = 7.92$  (d,  $J = 7.2$  Hz, 1H), 7.74 (d,  $J = 8.4$  Hz, 2H), 7.59 (dd,  $J = 7.6, 7.6$  Hz, 1H), 7.50 (dd,  $J = 6.8, 6.8$  Hz, 2H), 7.24 (d,  $J = 8.4$  Hz, 2H), 4.84 (s, 2H), 2.36 (s, 3H) ppm. The spectral data match those previously reported.<sup>1</sup>

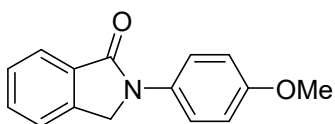

**1c**

**2-(p-Methoxyphenyl)isoindolin-1-one (1c):** Prepared according to **Method A** starting from *p*-anisidine in 62% isolated yield.  $^1\text{H NMR}$  (400 MHz,  $\text{CDCl}_3$ ):  $\delta = 7.92$  (d,  $J = 7.6$  Hz, 1H), 7.74 (d,  $J = 9.2$  Hz, 2H), 7.58 (dd,  $J = 7.6, 7.6$  Hz, 1H), 7.52-7.48 (m, 2H), 6.97 (d,  $J = 9.2$  Hz, 2H), 4.83 (s, 2H), 3.83 (s, 3H) ppm. The spectral data match those previously reported.<sup>1</sup>

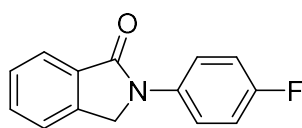

**1d**

**2-(*p*-Fluorophenyl)isoindolin-1-one (1d):** Prepared according to **Method A** starting from 4-fluoroaniline in 66% isolated yield.  $^1\text{H NMR}$  (300 MHz,  $\text{CDCl}_3$ ):  $\delta = 7.91$  (d,  $J = 8.1$  Hz, 1H), 7.83-7.78 (m, 2H), 7.59 (dd,  $J = 7.2, 7.2$  Hz, 1H), 7.52-7.47 (m, 2H), 7.10 (dd,  $J = 9.0, 8.4$  Hz, 2H), 4.81 (s, 2H) ppm. The spectral data match those previously reported.<sup>1</sup>

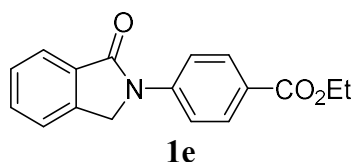

**Ethyl 4-(1-oxoisoindolin-2-yl)benzoate (1e):** Prepared according to **Method A** starting from ethyl 4-aminobenzoate in 96% isolated yield.  $^1\text{H NMR}$  (400 MHz,  $\text{CDCl}_3$ ):  $\delta = 8.11$  (d,  $J = 8.4$  Hz, 2H), 7.99 (d,  $J = 8.8$  Hz, 2H), 7.94 (d,  $J = 7.6$  Hz, 1H), 7.63 (dd,  $J = 7.6, 7.6$  Hz, 1H), 7.53 (dd,  $J = 7.6, 7.6$  Hz, 2H), 4.90 (s, 2H), 4.39 (q,  $J = 7.2$  Hz, 2H), 1.41 (t,  $J = 7.2$  Hz, 3H) ppm. The spectral data match those previously reported.<sup>1</sup>

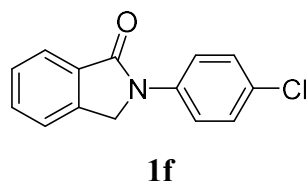

**2-(4-Chlorophenyl)isoindolin-1-one (1f):** Prepared according to **Method B** starting from 4-chloroaniline in 80% isolated yield.  $^1\text{H NMR}$  (400 MHz,  $\text{CDCl}_3$ ):  $\delta = 7.91$  (d,  $J = 6.8$  Hz, 1H), 7.83 (dd,  $J = 6.8, 2.0$  Hz, 2H), 7.63-7.59 (m, 1H), 7.51 (dd,  $J = 6.8, 6.8$  Hz, 2H), 7.38 (dd,  $J = 6.8, 2.0$  Hz, 2H), 4.83 (s, 2H) ppm. The spectral data match those previously reported.<sup>2</sup>

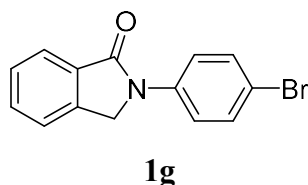

**2-(4-Bromophenyl)isoindolin-1-one (1g):** Prepared according to **Method B** starting from 4-bromoaniline in 80% isolated yield.  $^1\text{H NMR}$  (400 MHz,  $\text{CDCl}_3$ ):  $\delta = 7.91$  (d,  $J = 7.2$  Hz, 1H), 7.83 (dd,  $J = 6.8, 2.0$  Hz, 2H), 7.63-7.59 (m, 1H), 7.55-7.49 (m, 4H), 4.83 (s, 2H) ppm. The spectral data match those previously reported.<sup>2</sup>

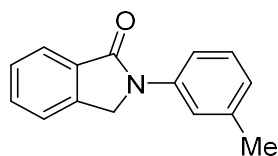

**1h**

**2-(*m*-Tolyl)isoindolin-1-one (1h):** Prepared according to **Method A** starting from *m*-toluidine in 65% isolated yield.  $^1\text{H}$  NMR (400 MHz,  $\text{CDCl}_3$ ):  $\delta$  = 7.93 (d,  $J$  = 6.8 Hz, 1H), 7.73 (s, 1H), 7.65-7.58 (m, 2H), 7.51 (dd,  $J$  = 7.2, 6.8 Hz, 2H), 7.32 (dd,  $J$  = 8.0, 8.0 Hz, 1H), 7.01 (d,  $J$  = 7.6 Hz, 1H), 4.86 (s, 2H), 2.41 (s, 3H) ppm. The spectral data match those previously reported.<sup>1</sup>

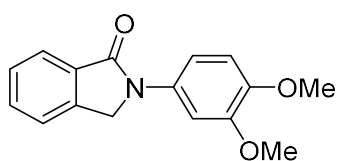

**1i**

**2-(3,4-Dimethoxyphenyl)isoindolin-1-one (1i):** Prepared according to **Method A** starting from 3,4-dimethylaniline in 80% isolated yield.  $^1\text{H}$  NMR (300 MHz,  $\text{CDCl}_3$ ):  $\delta$  = 7.93-7.88 (m, 2H), 7.62-7.57 (m, 1H), 7.53-7.48 (m, 2H), 7.04 (dd,  $J$  = 8.7, 2.4 Hz, 1H), 6.90 (d,  $J$  = 8.7 Hz, 1H), 4.84 (s, 2H), 3.95 (s, 3H), 3.90 (s, 3H) ppm. The spectral data match those previously reported.<sup>1</sup>

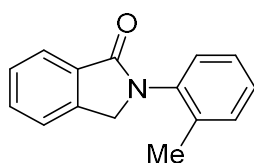

**1j**

**2-(*o*-Tolyl)isoindolin-1-one (1j):** Prepared according to **Method A** starting from *o*-toluidine in 68% isolated yield.  $^1\text{H}$  NMR (400 MHz,  $\text{CDCl}_3$ ):  $\delta$  = 7.96 (d,  $J$  = 7.6 Hz, 1H), 7.61 (ddd,  $J$  = 7.2, 7.2, 1.2 Hz, 1H), 7.55-7.50 (m, 2H), 7.35-7.32 (m, 1H), 7.30-7.24 (m, 3H), 4.74 (s, 2H), 2.27 (s, 3H) ppm. The spectral data match those previously reported.<sup>1</sup>

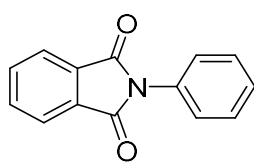

**1k**

***N*-Phenylphthalimide (1k):** Prepared according to **Method C** starting from aniline in 80% isolated yield. <sup>1</sup>H NMR (400 MHz, CDCl<sub>3</sub>): δ = 7.96 (dd, *J* = 5.6, 3.2 Hz, 2H), 7.80 (dd, *J* = 5.2, 3.2 Hz, 2H), 7.52 (dd, *J* = 7.6, 7.6 Hz, 2H), 7.34-7.27 (m, 3H) ppm. The spectral data match those previously reported.<sup>3</sup>



### 3. Synthesis and characterization of dioxazolones 2.

**3.1. Method D:** To a stirred solution of hydroxamic acid (2.0 mmol) with dichloromethane (20 mL) in an oven-dried flask (50 mL) was added 1,1'-carbonyldiimidazole (324.3 mg, 2.0 mmol) in one portion at room temperature. The reaction mixture was stirred for 30 min under an argon atmosphere, then quenched with 1N HCl (25 mL), extracted with dichloromethane (3×30 mL), and dried over anhydrous Na<sub>2</sub>SO<sub>4</sub>. After the solvent was evaporated, the product was purified by silica gel chromatography to afford 3-substituted 1,4,2-dioxazol-5-one.

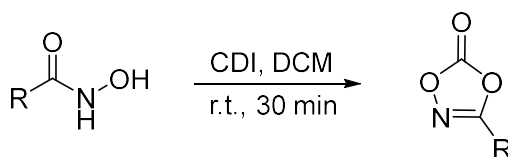

### 3.2. Characterization of dioxazolones 2.

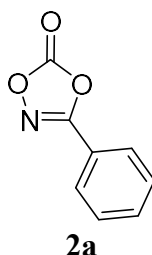

**3-Phenyl-1,4,2-dioxazol-5-one (2a):** Prepared according to **Method D**, resulting the desired compound in 98% isolated yield. <sup>1</sup>H NMR (360 MHz, CDCl<sub>3</sub>): δ = 7.88-7.85 (m, 2H), 7.68-7.63 (m, 1H), 7.58-7.53 (m, 2H) ppm. The spectral data match those previously reported.<sup>4</sup>

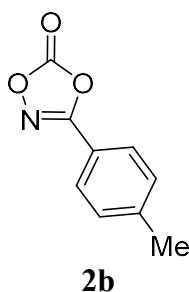

**3-(p-Tolyl)-1,4,2-dioxazol-5-one (2b):** Prepared according to **Method D**, resulting the desired compound in 92% isolated yield. <sup>1</sup>H NMR (300 MHz, CDCl<sub>3</sub>): δ = 7.74 (d, J =

8.1 Hz, 2H), 7.34 (d,  $J = 8.1$  Hz, 2H), 2.45 (s, 3H) ppm. The spectral data match those previously reported.<sup>4</sup>

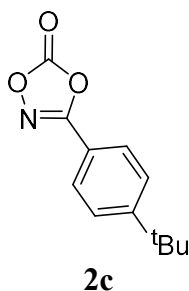

**3-(4-(*tert*-Butyl)phenyl)-1,4,2-dioxazol-5-one (2c):** Prepared according to **Method D**, resulting the desired compound in 80% isolated yield. <sup>1</sup>H NMR (360 MHz, CDCl<sub>3</sub>):  $\delta = 7.78$  (d,  $J = 8.6$  Hz, 2H), 7.56 (d,  $J = 8.6$  Hz, 2H), 1.36 (s, 9H) ppm. The spectral data match those previously reported.<sup>4</sup>

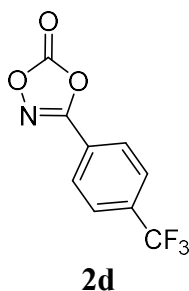

**3-(4-(Trifluoromethyl)phenyl)-1,4,2-dioxazol-5-one (2d):** Prepared according to **Method D**, resulting the desired compound in 90% isolated yield. <sup>1</sup>H NMR (360 MHz, CDCl<sub>3</sub>):  $\delta = 8.01$  (d,  $J = 8.3$  Hz, 2H), 7.83 (d,  $J = 8.3$  Hz, 2H) ppm. The spectral data match those previously reported.<sup>4</sup>

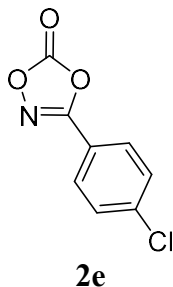

**3-(4-Chlorophenyl)-1,4,2-dioxazol-5-one (2e):** Prepared according to **Method D**, resulting the desired compound in 53% isolated yield. <sup>1</sup>H NMR (300 MHz, CDCl<sub>3</sub>):  $\delta = 7.80$  (d,  $J = 8.4$  Hz, 2H), 7.54 (d,  $J = 8.1$  Hz, 2H) ppm. The spectral data match those previously reported.<sup>4</sup>

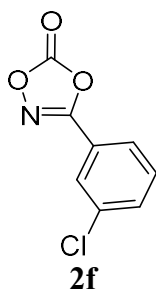

**3-(3-Chlorophenyl)-1,4,2-dioxazol-5-one (2f):** Prepared according to **Method D**, resulting the desired compound in 60% isolated yield.  $^1\text{H NMR}$  (360 MHz,  $\text{CDCl}_3$ ):  $\delta = 7.86$  (s, 1H), 7.76 (d,  $J = 8.3$  Hz, 1H), 7.63 (d,  $J = 8.3$  Hz, 1H), 7.51 (dd,  $J = 8.3, 8.3$  Hz, 1H) ppm. The spectral data match those previously reported.<sup>4</sup>

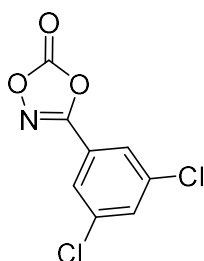

**3-(3,5-dichlorophenyl)-1,4,2-dioxazol-5-one (2g):** Prepared according to **Method D**, resulting the desired compound in 97% isolated yield.  $^1\text{H NMR}$  (400 MHz,  $\text{CDCl}_3$ ):  $\delta = 7.75$  (d,  $J = 1.6$  Hz, 2H), 7.64 (dd,  $J = 2.0, 2.0$  Hz, 1H) ppm. The spectral data match those previously reported.<sup>5</sup>

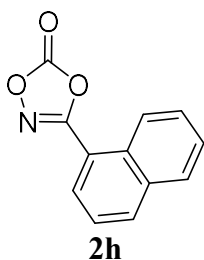

**3-(Naphthalen-1-yl)-1,4,2-dioxazol-5-one (2h):** Prepared according to **Method D**, resulting the desired compound in 50% isolated yield.  $^1\text{H NMR}$  (300 MHz,  $\text{CDCl}_3$ ):  $\delta = 8.10$  (d,  $J = 9.2$  Hz, 1H), 7.88-7.85 (m, 1H), 7.71 (d,  $J = 9.2$  Hz, 1H), 7.59-7.54 (m, 2H), 7.41 (dd,  $J = 8.1, 7.5$  Hz, 1H), 7.29 (d,  $J = 7.5$  Hz, 1H) ppm. The spectral data match those previously reported.<sup>6</sup>

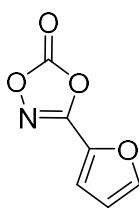

**2i**

**3-(Furan-2-yl)-1,4,2-dioxazol-5-one (2i):** Prepared according to **Method D**, resulting the desired compound in 55% isolated yield.  $^1\text{H}$  NMR (300 MHz,  $\text{CDCl}_3$ ):  $\delta = 7.72$  (s, 1H), 7.19 (d,  $J = 3.6$  Hz, 1H), 6.66 (s, 1H) ppm. The spectral data match those previously reported.<sup>6</sup>

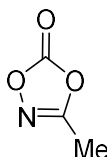

**2j**

**3-Methyl-1,4,2-dioxazol-5-one (2j):** Prepared according to **Method D**, resulting the desired compound in 61% isolated yield.  $^1\text{H}$  NMR (300 MHz,  $\text{CDCl}_3$ ):  $\delta = 2.36$  (s, 3H) ppm. The spectral data match those previously reported.<sup>7</sup>

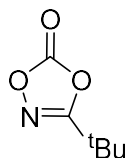

**2k**

**3-(tert-Butyl)-1,4,2-dioxazol-5-one (2k):** Prepared according to **Method D**, resulting the desired compound in 72% isolated yield.  $^1\text{H}$  NMR (300 MHz,  $\text{CDCl}_3$ ):  $\delta = 1.36$  (s, 9H) ppm. The spectral data match those previously reported.<sup>8</sup>

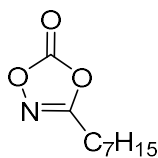

**2l**

**3-Heptyl-1,4,2-dioxazol-5-one (2l):** Prepared according to **Method D**, resulting the desired compound in 99% isolated yield.  $^1\text{H}$  NMR (300 MHz,  $\text{CDCl}_3$ ):  $\delta = 2.62$  (t,  $J =$

7.5 Hz, 2H), 1.77-1.67 (m, 2H), 1.42-1.28 (m, 8H), 0.89 (t,  $J = 6.9$  Hz, 3H) ppm. The spectral data match those previously reported.<sup>7</sup>

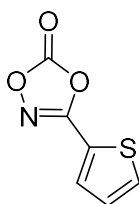

**2m**

**3-(Thiophen-2-yl)-1,4,2-dioxazol-5-one (2m):** Prepared according to **Method D**, resulting the desired compound in 62% isolated yield. <sup>1</sup>H NMR (300 MHz, CDCl<sub>3</sub>):  $\delta = 7.74$ - $7.70$  (m, 2H),  $7.22$  (dd,  $J = 5.1, 3.9$  Hz, 1H) ppm. The spectral data match those previously reported.<sup>8</sup>

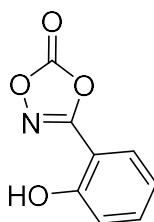

**2n**

**3-(2-Hydroxyphenyl)-1,4,2-dioxazol-5-one (2n):** Prepared according to **Method D**, resulting the desired compound in 49% isolated yield. <sup>1</sup>H NMR (300 MHz, DMSO-*d*<sub>6</sub>):  $\delta = 11.17$  (s, br, 1H),  $7.98$  (dd,  $J = 8.1, 1.8$  Hz, 1H),  $7.84$ - $7.78$  (m, 1H),  $7.48$ - $7.42$  (m, 2H) ppm. The spectral data match those previously reported.<sup>8</sup>

#### 4. Reaction optimization.

**4.1. General procedure:** A suspension of substrates **1** (0.3 mmol, 1.0 equiv.), dioxazolones **2** (0.45 mmol, 1.5 equiv.),  $[\text{RuCl}_2(p\text{-cymene})]_2$  (5 mol%),  $\text{AgSbF}_6$  (20 mol%), and PivOH (0.06 mmol, 0.2 equiv.) in anhydrous TFE (1.5 mL) was stirred at 40 °C for 20 h under air. At ambient temperature, then the solvent was evaporated *in vacuo*, and the resulting crude reaction mixture was purified by flash column chromatography to afford the corresponding product **3** as a solid.

## 4.2. Screening of reaction conditions.

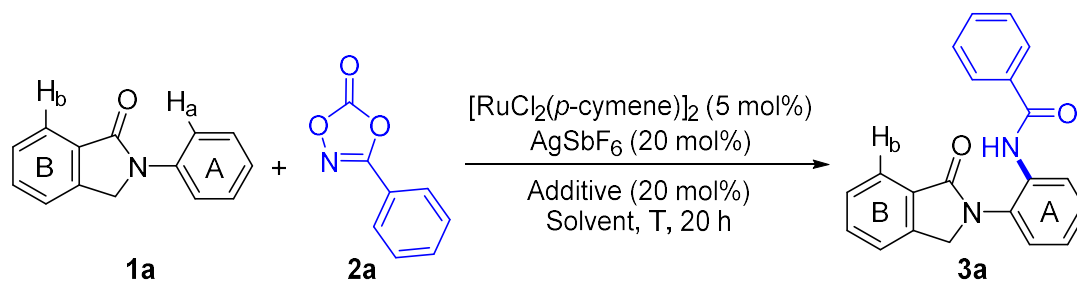

| Entry <sup>[a]</sup> | Additive                       | Solvent     | T (°C)    | Yield (%) <sup>[b]</sup> |
|----------------------|--------------------------------|-------------|-----------|--------------------------|
| 1 <sup>[c]</sup>     | —                              | DCE         | 80        | 61                       |
| 2 <sup>[c]</sup>     | —                              | DCE         | 60        | 72                       |
| 3 <sup>[c]</sup>     | —                              | DCE         | 40        | 69                       |
| 4                    | —                              | DCE         | 40        | 70                       |
| 5                    | —                              | DCE         | 25        | 69                       |
| 6 <sup>[d]</sup>     | NaOAc                          | DCE         | 40        | 15                       |
| 7                    | NaOAc                          | DCE         | 40        | 0                        |
| 8                    | K <sub>2</sub> CO <sub>3</sub> | DCE         | 40        | 52                       |
| 9                    | —                              | TFE         | 40        | 73                       |
| 10                   | —                              | THF         | 40        | 19                       |
| 11                   | AcOH                           | TFE         | 40        | 76                       |
| <b>12</b>            | <b>PivOH</b>                   | <b>TFE</b>  | <b>40</b> | <b>82 (80)</b>           |
| 13                   | AdCO <sub>2</sub> H            | TFE         | 40        | 79                       |
| 14                   | H <sub>2</sub> O               | TFE         | 40        | 54                       |
| 15                   | PivOH                          | DCE         | 40        | 65                       |
| 16 <sup>[e]</sup>    | PivOH                          | TFE         | 40        | 60                       |
| 17                   | PivOH                          | TFE         | 25        | 70                       |
| 18                   | PivOH                          | 1,4-dioxane | 40        | 0                        |
| 19 <sup>[f]</sup>    | PivOH                          | TFE         | 40        | 0                        |
| 20 <sup>[g]</sup>    | PivOH                          | TFE         | 40        | 0                        |

<sup>[a]</sup> Reaction conditions: **1a** (0.1 mmol), **2a** (0.15 mmol), [RuCl<sub>2</sub>(*p*-cymene)]<sub>2</sub> (5 mol%), AgSbF<sub>6</sub> (20 mol%), PivOH (0.02 mmol, 0.2 equiv.), TFE (0.5 mL), 40 °C, 20 h, air. <sup>[b]</sup> Determined by <sup>1</sup>H NMR spectroscopy against an internal standard (dibromomethane). The isolated yield is shown in parentheses. <sup>[c]</sup> 1.1 equiv. of **2a**. <sup>[d]</sup> 2 equiv. of NaOAc. <sup>[e]</sup> 1.2 equiv. of **2a**. <sup>[f]</sup> Without [RuCl<sub>2</sub>(*p*-cymene)]<sub>2</sub>. <sup>[g]</sup> Without AgSbF<sub>6</sub>.

## 5. Deuteration experiments.

In an oven dried Schlenk tube, to a solution of isoindolinone **1a** (0.1 mmol, 1 equiv.) in TFE (0.45 mL) and D<sub>2</sub>O (0.05 mL) was added the combined reagents under air: [RuCl<sub>2</sub>(*p*-cymene)]<sub>2</sub> (5 mol%), AgSbF<sub>6</sub> (20 mol%), and PivOH (0.06 mmol, 0.2 equiv.). The Schlenk tube was sealed with a Teflon cap and it was heated to 40 °C for 20 h. At ambient temperature, then the solvent was evaporated *in vacuo*, and the resulting crude reaction mixture was purified by flash column chromatography (*n*-heptane/EtOAc, 4/1 to 1/1, *v/v*) to afford the deuterated product as a white solid in 17% yield (see spectra below).

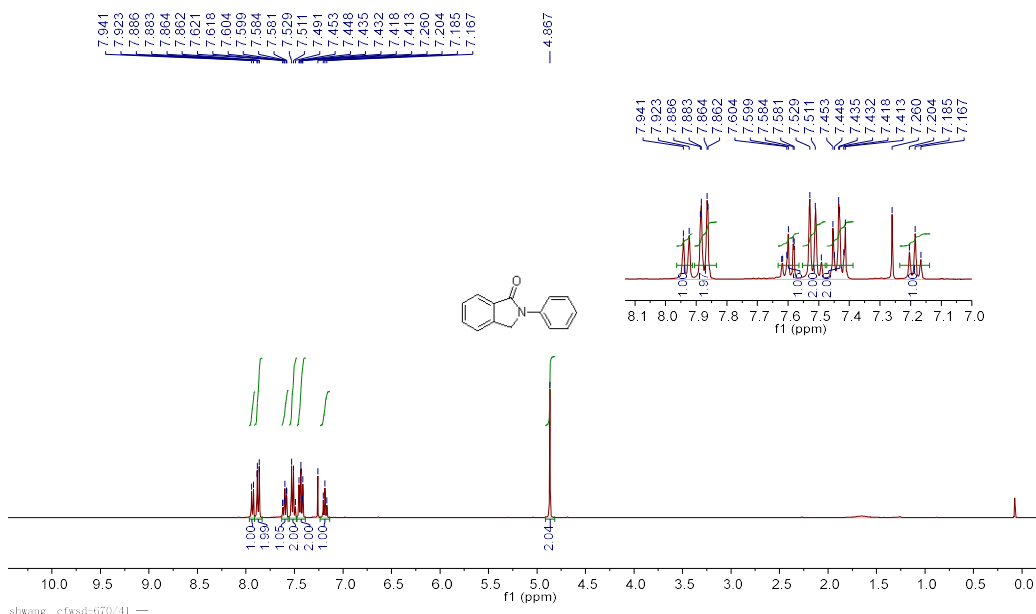

<sup>1</sup>H NMR (CDCl<sub>3</sub>) spectrum of **1a** in a reaction without using D<sub>2</sub>O.

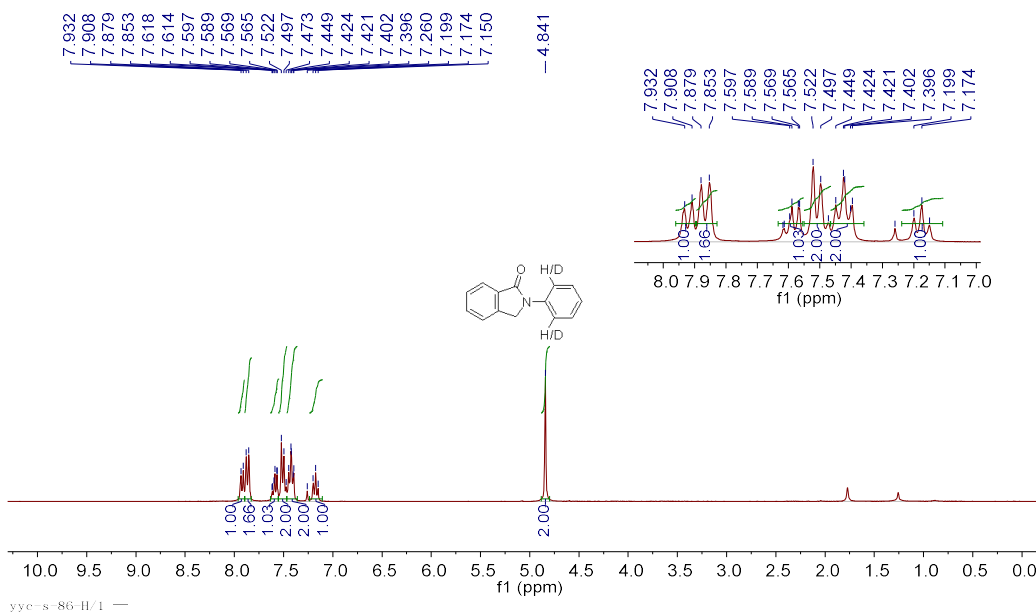

<sup>1</sup>H NMR (CDCl<sub>3</sub>) spectrum of **1a-d** showing low intensity of the peak at 7.86 ppm.



## 6. Large-scale reaction

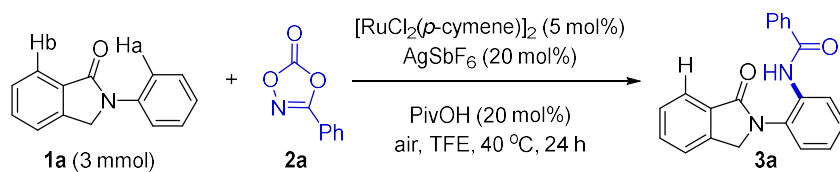

**General procedure:** A suspension of substrates **1a** (5 mmol, 1.0 equiv., 1.05 g), dioxazolones **2a** (7.5 mmol, 1.5 equiv., 1.22 g),  $[\text{RuCl}_2(p\text{-cymene})]_2$  (5 mol%),  $\text{AgSbF}_6$  (20 mol%), and PivOH (1.0 mmol, 0.2 equiv.) in anhydrous TFE (25 mL) was stirred at 40 °C for 20 h under air. At ambient temperature, then the solvent was evaporated *in vacuo*, and the resulting crude reaction mixture was purified by flash column chromatography to afford the corresponding product **3a** as a solid in 79% yield (1.30 g).

## 7. Characterization data of products.

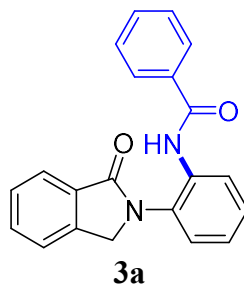

***N*-(2-(1-oxoisoindolin-2-yl)phenyl)benzamide (3a):** White solid, yield = 80%, 80.7 mg. Mp: 192-195 °C.  $^1\text{H}$  NMR (300 MHz,  $\text{CDCl}_3$ ):  $\delta$  = 9.67 (s, 1H), 8.03 (dd,  $J$  = 8.1, 1.2 Hz, 1H), 7.98-7.92 (m, 3H), 7.60-7.31 (m, 8H), 7.24 (dd,  $J$  = 7.2, 7.2 Hz, 1H), 4.85 (s, 2H) ppm.  $^{13}\text{C}\{^1\text{H}\}$  NMR (75 MHz,  $\text{CDCl}_3$ ):  $\delta$  = 168.4, 165.3, 141.9, 134.1, 133.3, 132.3, 131.8, 131.5, 130.9, 128.6, 128.5, 127.7, 127.3, 126.9, 125.8, 124.8, 124.1, 122.9, 53.2 ppm. HRMS (ESI) calcd. for  $[\text{M} + \text{Na}]^+$   $\text{C}_{21}\text{H}_{16}\text{N}_2\text{O}_2\text{Na}$  351.1104, found 351.1097 (2 ppm).

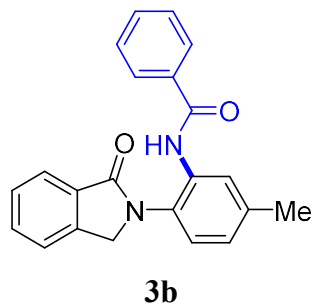

***N*-(5-methyl-2-(1-oxoisoindolin-2-yl)phenyl)benzamide (3b):** White solid, yield = 76%, 77.9 mg. Mp: 248-250 °C.  $^1\text{H}$  NMR (300 MHz,  $\text{CDCl}_3$ ):  $\delta$  = 9.57 (s, 1H), 7.96 (d,  $J$  = 6.9 Hz, 3H), 7.86 (s, 1H), 7.61 (dd,  $J$  = 7.8, 7.5 Hz, 1H), 7.55-7.42 (m, 5H), 7.23 (d,  $J$  = 8.1 Hz, 1H), 7.09 (d,  $J$  = 8.4 Hz, 1H), 4.89 (s, 2H), 2.43 (s, 3H) ppm.  $^{13}\text{C}\{^1\text{H}\}$  NMR (75 MHz,  $\text{CDCl}_3$ ):  $\delta$  = 168.5, 165.4, 142.0, 138.1, 134.3, 133.1, 132.4, 131.9, 131.8, 128.7, 128.6, 128.5, 127.5, 127.4, 126.8, 124.6, 124.3, 123.0, 53.4, 21.3 ppm. HRMS (ESI) calcd. for  $[\text{M} + \text{Na}]^+$   $\text{C}_{22}\text{H}_{18}\text{N}_2\text{O}_2\text{Na}$  365.1260, found 365.1247 (3.8 ppm).

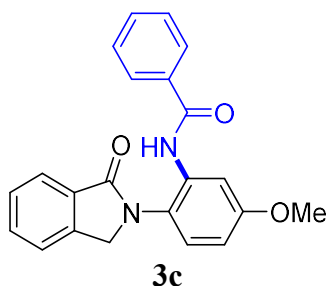

***N*-(5-methoxy-2-(1-oxoisindolin-2-yl)phenyl)benzamide (3c):** White solid, yield = 83%, 88.9 mg. Mp: 203-205 °C. <sup>1</sup>H NMR (300 MHz, CDCl<sub>3</sub>): δ = 9.63 (s, 1H), 7.98-7.93 (m, 3H), 7.66 (d, *J* = 3.0 Hz, 1H), 7.62-7.40 (m, 6H), 7.22 (d, *J* = 8.7 Hz, 1H), 6.81 (dd, *J* = 8.7, 3.0 Hz, 1H), 4.83 (s, 2H), 3.85 (s, 3H) ppm. <sup>13</sup>C {<sup>1</sup>H} NMR (75 MHz, CDCl<sub>3</sub>): δ = 168.4, 165.4, 159.0, 141.9, 134.6, 134.3, 132.3, 131.9, 131.8, 128.7, 128.6, 127.4, 125.7, 124.2, 123.6, 122.9, 112.8, 110.5, 55.7, 53.6 ppm. HRMS (ESI) calcd. for [M + Na]<sup>+</sup> C<sub>22</sub>H<sub>18</sub>N<sub>2</sub>O<sub>3</sub>Na 381.1210, found 381.1197 (3.2 ppm).

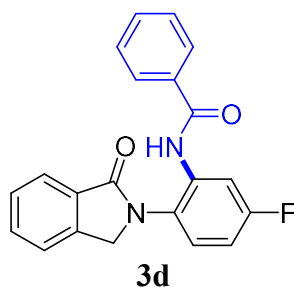

***N*-(5-fluoro-2-(1-oxoisindolin-2-yl)phenyl)benzamide (3d):** White solid, yield = 45%, 46.7 mg. Mp: 172-175 °C. <sup>1</sup>H NMR (360 MHz, CDCl<sub>3</sub>): δ = 9.63 (s, 1H), 7.99-7.93 (m, 3H), 7.89 (dd, *J* = 10.1, 2.9 Hz, 1H), 7.63 (ddd, *J* = 7.6, 7.6, 1.1 Hz, 1H), 7.57-7.43 (m, 5H), 7.30 (dd, *J* = 9.0, 5.4 Hz, 1H), 7.02-6.96 (m, 1H), 4.89 (s, 2H) ppm. <sup>13</sup>C {<sup>1</sup>H} NMR (90 MHz, CDCl<sub>3</sub>): δ = 168.7, 165.4, 161.6 (d, *J*<sub>C-F</sub> = 245.6 Hz), 141.9, 135.2 (d, *J*<sub>C-F</sub> = 11.8 Hz), 134.0, 132.7, 132.2, 131.6, 128.8, 127.5, 126.7 (d, *J*<sub>C-F</sub> = 3.9 Hz), 126.1 (d, *J*<sub>C-F</sub> = 9.7 Hz), 124.4, 123.0, 113.5 (d, *J*<sub>C-F</sub> = 25.7 Hz), 122.8 (d, *J*<sub>C-F</sub> = 23.1 Hz), 53.7 ppm. <sup>19</sup>F {<sup>1</sup>H} NMR (235 MHz, CDCl<sub>3</sub>): δ = -112.4 ppm. HRMS (ESI) calcd. for [M + Na]<sup>+</sup> C<sub>21</sub>H<sub>15</sub>N<sub>2</sub>O<sub>2</sub>FNa 369.1010, found 369.1001 (2.4 ppm).

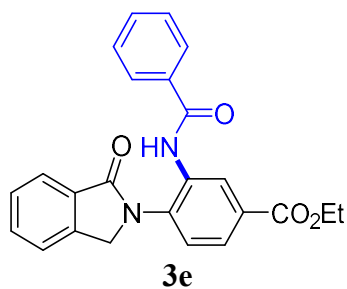

**Ethyl 3-benzamido-4-(1-oxoisindolin-2-yl)benzoate (3e):** White solid, yield = 66%, 79.3 mg. Mp: 253-255 °C.  $^1\text{H}$  NMR (300 MHz,  $\text{CDCl}_3$ ):  $\delta$  = 9.69 (s, 1H), 8.67 (d,  $J$  = 2.1 Hz, 1H), 7.99-7.95 (m, 4H), 7.66-7.61 (m, 1H), 7.56-7.40 (m, 6H), 4.96 (s, 2H), 4.40 (q,  $J$  = 7.2 Hz, 2H), 1.40 (t,  $J$  = 7.2 Hz, 3H) ppm.  $^{13}\text{C}\{^1\text{H}\}$  NMR (75 MHz,  $\text{CDCl}_3$ ):  $\delta$  = 168.7, 165.7, 165.5, 141.9, 135.1, 134.1, 133.3, 132.8, 132.1, 131.5, 129.9, 128.9, 128.8, 128.7, 127.5, 127.2, 124.5, 123.1, 61.4, 53.3, 14.5 ppm. HRMS (ESI) calcd. for  $[\text{M} + \text{H}]^+$   $\text{C}_{24}\text{H}_{21}\text{N}_2\text{O}_4$  401.1496, found 401.1476 (4.9 ppm).

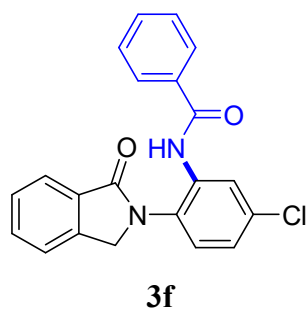

**N-(5-chloro-2-(1-oxoisindolin-2-yl)phenyl)benzamide (3f):** White solid, yield = 62%, 66.9 mg. Mp: 232-234 °C.  $^1\text{H}$  NMR (400 MHz,  $\text{CDCl}_3$ ):  $\delta$  = 9.65 (s, 1H), 8.12 (d,  $J$  = 2.0 Hz, 1H), 7.97-7.93 (m, 3H), 7.63 (dd,  $J$  = 7.6, 7.6 Hz, 1H), 7.56-7.43 (m, 5H), 7.28-7.22 (m, 2H), 4.89 (s, 2H) ppm.  $^{13}\text{C}\{^1\text{H}\}$  NMR (100 MHz,  $\text{CDCl}_3$ ):  $\delta$  = 168.7, 165.4, 141.9, 134.6, 134.0, 133.4, 132.7, 132.1, 131.5, 129.4, 128.86, 128.82, 127.5, 126.8, 125.9, 125.8, 124.5, 123.0, 53.5 ppm. HRMS (ESI) calcd. for  $[\text{M} + \text{H}]^+$   $\text{C}_{21}\text{H}_{16}\text{N}_2\text{O}_2\text{Cl}$  363.0895, found 363.0895 (0 ppm).

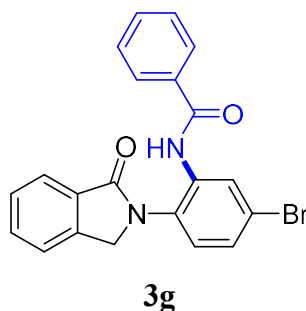

***N*-(5-bromo-2-(1-oxoisindolin-2-yl)phenyl)benzamide (3g):** White solid, yield = 73%, 88.9 mg. Mp: 241-243 °C. <sup>1</sup>H NMR (400 MHz, CDCl<sub>3</sub>): δ = 9.65 (s, 1H), 8.26 (d, *J* = 2.4 Hz, 1H), 7.98-7.93 (m, 3H), 7.63 (ddd, *J* = 7.6, 7.2, 1.2 Hz, 1H), 7.56-7.49 (m, 3H), 7.47-7.43 (m, 2H), 7.39 (dd, *J* = 8.4, 2.0 Hz, 1H), 7.21 (d, *J* = 8.4 Hz, 1H), 4.90 (s, 2H) ppm. <sup>13</sup>C{<sup>1</sup>H} NMR (100 MHz, CDCl<sub>3</sub>): δ = 168.7, 165.4, 141.9, 134.8, 134.0, 132.8, 132.2, 131.5, 130.0, 129.7, 128.91, 128.87, 128.83, 127.5, 126.0, 124.5, 123.1, 121.1, 53.4 ppm. HRMS (ESI) calcd. for [M + H]<sup>+</sup> C<sub>21</sub>H<sub>16</sub>N<sub>2</sub>O<sub>2</sub>Br 407.0390, found 407.0390 (0 ppm).

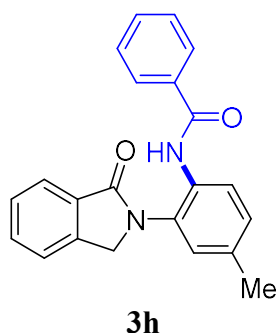

***N*-(4-methyl-2-(1-oxoisindolin-2-yl)phenyl)benzamide (3h):** White solid, yield = 81%, 83.0 mg. Mp: 195-197 °C. <sup>1</sup>H NMR (300 MHz, CDCl<sub>3</sub>): δ = 9.53 (s, 1H), 7.97-7.87 (m, 4H), 7.63-7.41 (m, 6H), 7.22 (d, *J* = 8.4 Hz, 1H), 7.15 (s, 1H), 4.91 (s, 2H), 2.38 (s, 3H) ppm. <sup>13</sup>C{<sup>1</sup>H} NMR (75 MHz, CDCl<sub>3</sub>): δ = 168.4, 165.4, 141.9, 136.0, 134.3, 132.4, 131.8, 130.8, 130.7, 128.6, 127.4, 127.0, 125.1, 124.2, 122.9, 53.3, 21.1 ppm. HRMS (ESI) calcd. for [M + Na]<sup>+</sup> C<sub>22</sub>H<sub>18</sub>N<sub>2</sub>O<sub>2</sub>Na 365.1260, found 365.1266 (1.5 ppm).

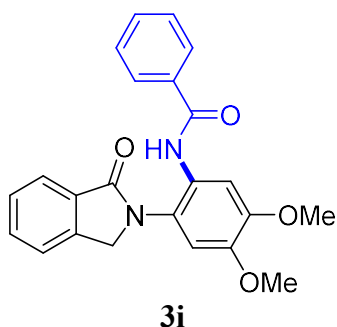

***N*-(4,5-dimethoxy-2-(1-oxoisindolin-2-yl)phenyl)benzamide (3i):** White solid, yield = 90%, 104.9 mg. Mp: 205-207 °C. <sup>1</sup>H NMR (300 MHz, CDCl<sub>3</sub>): δ = 9.42 (s, 1H), 7.94-7.89 (m, 3H), 7.58-7.39 (m, 7H), 6.80 (s, 1H), 4.86 (s, 2H), 3.93 (s, 3H), 3.86 (s, 3H) ppm. <sup>13</sup>C{<sup>1</sup>H} NMR (75 MHz, CDCl<sub>3</sub>): δ = 168.3, 165.4, 148.4, 146.9, 141.8, 134.1, 132.3, 131.8, 131.7, 128.7, 128.6, 127.3, 126.7, 124.2, 123.3, 122.9, 109.5, 107.8, 56.4,

56.2, 53.4 ppm. HRMS (ESI) calcd. for  $[M + Na]^+$   $C_{23}H_{20}N_2O_4Na$  411.1315, found 411.1298 (4.3 ppm).

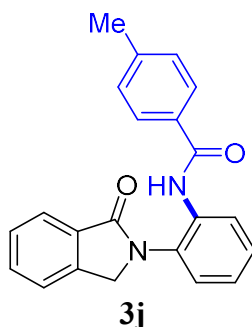

**4-Methyl-N-(2-(1-oxoisindolin-2-yl)phenyl)benzamide (3j):** White solid, yield = 89%, 91.4 mg. Mp: 192-194 °C.  $^1H$  NMR (300 MHz,  $CDCl_3$ ):  $\delta$  = 9.59 (s, 1H), 8.03 (dd,  $J$  = 8.4, 1.2 Hz, 1H), 7.97 (d,  $J$  = 7.2 Hz, 1H), 7.87 (d,  $J$  = 8.4 Hz, 2H), 7.60 (ddd,  $J$  = 7.5, 7.5, 1.2 Hz, 1H), 7.55-7.49 (m, 2H), 7.43-7.38 (m, 1H), 7.33 (dd,  $J$  = 8.1, 1.5 Hz, 1H), 7.28-7.23 (m, 3H), 4.89 (s, 2H), 2.38 (s, 3H) ppm.  $^{13}C\{^1H\}$  NMR (75 MHz,  $CDCl_3$ ):  $\delta$  = 168.5, 165.4, 142.3, 141.9, 133.5, 132.4, 131.7, 131.4, 130.9, 129.4, 128.6, 127.8, 127.4, 127.0, 125.8, 124.8, 124.2, 122.9, 53.4, 21.5 ppm. HRMS (ESI) calcd. for  $[M + Na]^+$   $C_{22}H_{18}N_2O_2Na$  365.1260, found 365.1247 (3.6 ppm).

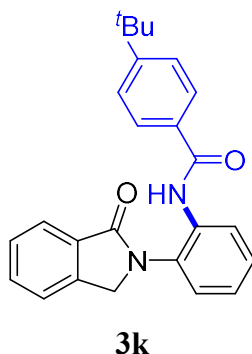

**4-(tert-Butyl)-N-(2-(1-oxoisindolin-2-yl)phenyl)benzamide (3k):** White solid, yield = 83%, 95.7 mg. Mp: 96-98 °C.  $^1H$  NMR (300 MHz,  $CDCl_3$ ):  $\delta$  = 9.56 (s, 1H), 8.04 (dd,  $J$  = 8.1, 1.5 Hz, 1H), 7.99 (d,  $J$  = 7.5 Hz, 1H), 7.91 (d,  $J$  = 8.4 Hz, 2H), 7.62 (ddd,  $J$  = 7.2, 7.2, 1.5 Hz, 1H), 7.56-7.24 (m, 7H), 4.91 (s, 2H), 1.32 (s, 9H) ppm.  $^{13}C\{^1H\}$  NMR (75 MHz,  $CDCl_3$ ):  $\delta$  = 168.6, 165.4, 155.4, 142.0, 133.6, 132.5, 131.8, 131.4, 130.9, 128.7, 127.9, 127.3, 127.1, 125.9, 125.7, 124.9, 124.4, 123.0, 53.4, 35.0, 31.2 ppm. HRMS (ESI) calcd. for  $[M + Na]^+$   $C_{25}H_{24}N_2O_2Na$  407.1730, found 407.1719 (2.7 ppm).

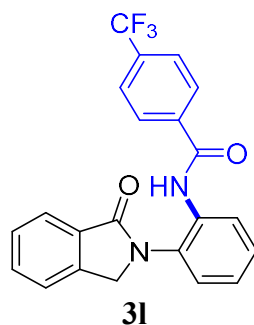

***N*-(2-(1-oxoisindolin-2-yl)phenyl)-4-(trifluoromethyl)benzamide (3l):** White solid, yield = 92%, 110.0 mg. Mp: 185-187 °C. <sup>1</sup>H NMR (300 MHz, CDCl<sub>3</sub>): δ = 9.90 (s, 1H), 8.08 (d, *J* = 8.1 Hz, 2H), 8.01 (d, *J* = 8.1 Hz, 1H), 7.96 (d, *J* = 7.5 Hz, 1H), 7.70 (d, *J* = 8.1 Hz, 2H), 7.62 (dd, *J* = 7.2, 7.2 Hz, 1H), 7.56-7.50 (m, 2H), 7.43-7.28 (m, 3H), 4.93 (s, 2H) ppm. <sup>13</sup>C {<sup>1</sup>H} NMR (75 MHz, CDCl<sub>3</sub>): δ = 168.6, 164.0, 141.9, 137.5, 133.3 (q, *J*<sub>C-F</sub> = 32.6 Hz), 132.8, 132.5, 131.5, 131.0, 128.6, 127.9, 127.8, 126.9, 126.2, 125.6 (q, *J*<sub>C-F</sub> = 2.6 Hz), 124.7, 124.2, 123.7 (q, *J*<sub>C-F</sub> = 271.0 Hz), 122.9, 53.3 ppm. <sup>19</sup>F {<sup>1</sup>H} NMR (235 MHz, CDCl<sub>3</sub>): δ = -62.9 ppm. HRMS (ESI) calcd. for [M + Na]<sup>+</sup> C<sub>22</sub>H<sub>15</sub>N<sub>2</sub>O<sub>2</sub>F<sub>3</sub>Na 419.0978, found 419.0968 (2.3 ppm).

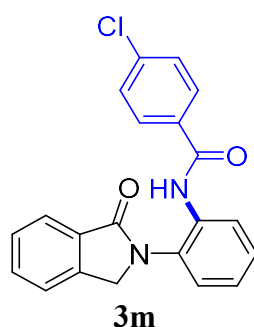

**4-Chloro-*N*-(2-(1-oxoisindolin-2-yl)phenyl)benzamide (3m):** White solid, yield = 91%, 99.0 mg. Mp: 243-245 °C. <sup>1</sup>H NMR (360 MHz, CDCl<sub>3</sub>): δ = 9.69 (s, 1H), 8.01 (d, *J* = 7.9 Hz, 1H), 7.97 (d, *J* = 7.6 Hz, 1H), 7.91 (d, *J* = 8.3 Hz, 2H), 7.63 (ddd, *J* = 7.6, 7.6, 1.1 Hz, 1H), 7.57-7.52 (m, 2H), 7.45-7.41 (m, 3H), 7.37-7.28 (m, 2H), 4.95 (s, 2H) ppm. <sup>13</sup>C {<sup>1</sup>H} NMR (75 MHz, CDCl<sub>3</sub>): δ = 168.7, 164.4, 142.0, 138.2, 133.3, 132.8, 132.6, 131.8, 131.1, 129.0, 128.8, 128.0, 127.2, 126.2, 124.8, 124.4, 123.0, 53.5 ppm. HRMS (ESI) calcd. for [M + Na]<sup>+</sup> C<sub>21</sub>H<sub>15</sub>N<sub>2</sub>O<sub>2</sub>ClNa 385.0714, found 385.0708 (1.7 ppm).

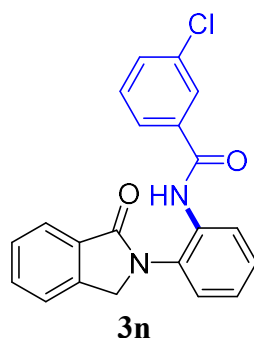

**3-Chloro-N-(2-(1-oxoisindolin-2-yl)phenyl)benzamide (3n):** White solid, yield = 91%, 99.2 mg. Mp: 180-182 °C. <sup>1</sup>H NMR (300 MHz, CDCl<sub>3</sub>): δ = 9.75 (s, 1H), 8.01-7.96 (m, 3H), 7.81 (d, *J* = 7.8 Hz, 1H), 7.61 (dd, *J* = 7.2, 7.2 Hz, 1H), 7.52 (dd, *J* = 8.4, 8.1 Hz, 2H), 7.46-7.25 (m, 5H), 4.91 (s, 2H) ppm. <sup>13</sup>C{<sup>1</sup>H} NMR (75 MHz, CDCl<sub>3</sub>): δ = 168.5, 164.0, 141.9, 136.1, 134.8, 132.9, 132.5, 131.8, 131.6, 131.0, 129.9, 128.6, 128.0, 127.8, 127.0, 126.2, 125.2, 124.7, 124.2, 122.9, 53.3 ppm. HRMS (ESI) calcd. for [M + H]<sup>+</sup> C<sub>21</sub>H<sub>16</sub>N<sub>2</sub>O<sub>2</sub>Cl 363.0895, found 363.0884 (3.0 ppm).

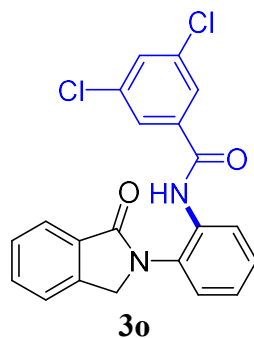

**3,5-Dichloro-N-(2-(1-oxoisindolin-2-yl)phenyl)benzamide (3o):** White solid, yield = 66%, 78.8 mg. Mp: > 250 °C. <sup>1</sup>H NMR (400 MHz, CDCl<sub>3</sub>): δ = 9.79 (s, 1H), 8.00 (dd, *J* = 8.0, 7.6 Hz, 2H), 7.82 (s, 2H), 7.65 (dd, *J* = 7.6, 7.6 Hz, 1H), 7.56 (dd, *J* = 8.0, 7.2 Hz, 2H), 7.47-7.42 (m, 2H), 7.39-7.31 (m, 2H), 4.97 (s, 2H) ppm. <sup>13</sup>C{<sup>1</sup>H} NMR (100 MHz, CDCl<sub>3</sub>): δ = 168.7, 162.9, 142.0, 137.4, 135.6, 132.7, 131.7, 131.3, 128.9, 128.0, 127.2, 126.5, 126.2, 124.7, 124.5, 123.0, 53.5 ppm. HRMS (ESI) calcd. for [M + Na]<sup>+</sup> C<sub>21</sub>H<sub>14</sub>Cl<sub>2</sub>N<sub>2</sub>O<sub>2</sub>Na 419.0325, found 419.0331 (6 ppm).



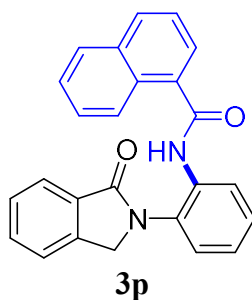

***N*-(2-(1-oxoisoindolin-2-yl)phenyl)-1-naphthamide (3p):** White solid, yield = 38%, 43.1 mg. Mp: 249-251 °C. <sup>1</sup>H NMR (300 MHz, CDCl<sub>3</sub>): δ = 9.11 (s, 1H), 8.38 (d, *J* = 8.4 Hz, 1H), 8.17 (d, *J* = 8.1 Hz, 1H), 7.91 (d, *J* = 8.1 Hz, 1H), 7.83 (d, *J* = 8.1 Hz, 2H), 7.76 (d, *J* = 7.2 Hz, 1H), 7.62 (ddd, *J* = 7.2, 7.2, 1.2 Hz, 1H), 7.54-7.42 (m, 5H), 7.39-7.28 (m, 3H), 4.97 (s, 2H) ppm. <sup>13</sup>C{<sup>1</sup>H} NMR (75 MHz, CDCl<sub>3</sub>): δ = 168.3, 168.0, 141.9, 133.9, 133.6, 132.5, 131.7, 131.3, 131.2, 130.4, 128.6, 128.4, 128.1, 127.1, 127.0, 126.4, 125.9, 125.4, 125.3, 125.0, 124.5, 123.0, 53.3 ppm. HRMS (ESI) calcd. for [M + Na]<sup>+</sup> C<sub>25</sub>H<sub>18</sub>N<sub>2</sub>O<sub>2</sub>Na 401.1260, found 401.1252 (2.2 ppm).

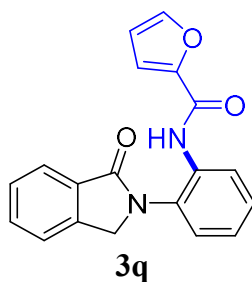

***N*-(2-(1-oxoisoindolin-2-yl)phenyl)furan-2-carboxamide (3q):** White solid, yield = 32%, 30.3 mg. Mp: < 50 °C. <sup>1</sup>H NMR (300 MHz, CDCl<sub>3</sub>): δ = 9.46 (s, 1H), 8.01 (d, *J* = 7.5 Hz, 2H), 7.64 (ddd, *J* = 7.5, 7.5, 1.2 Hz, 1H), 7.58-7.49 (m, 3H), 7.44-7.38 (m, 1H), 7.36-7.25 (m, 2H), 7.16 (dd, *J* = 3.6, 0.9 Hz, 1H), 6.47 (dd, *J* = 3.3, 1.8 Hz, 1H), 4.92 (s, 2H) ppm. <sup>13</sup>C{<sup>1</sup>H} NMR (75 MHz, CDCl<sub>3</sub>): δ = 168.4, 156.9, 148.0, 144.9, 142.0, 132.8, 132.4, 131.8, 131.0, 128.7, 128.0, 126.8, 126.1, 125.2, 124.5, 123.0, 115.1, 112.2, 53.3 ppm. HRMS (ESI) calcd. for [M + Na]<sup>+</sup> C<sub>19</sub>H<sub>14</sub>N<sub>2</sub>O<sub>3</sub>Na 341.0897, found 341.0889 (2.4 ppm).

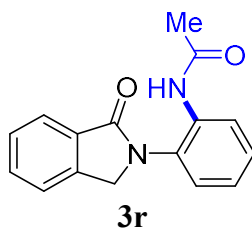

***N*-(2-(1-oxoisindolin-2-yl)phenyl)acetamide (3r):** White solid, yield = 80%, 64.2 mg. Mp: 171-173 °C. <sup>1</sup>H NMR (300 MHz, CDCl<sub>3</sub>): δ = 8.66 (s, 1H), 7.84 (dd, *J* = 8.4, 7.2 Hz, 2H), 7.63 (dd, *J* = 7.5, 7.2 Hz, 1H), 7.54-7.49 (m, 2H), 7.36-7.31 (m, 1H), 7.29-7.19 (m, 2H), 4.86 (s, 2H), 2.06 (s, 3H) ppm. <sup>13</sup>C{<sup>1</sup>H} NMR (75 MHz, CDCl<sub>3</sub>): δ = 169.0, 168.5, 142.0, 133.5, 132.4, 131.7, 130.7, 128.5, 127.9, 126.8, 125.8, 125.3, 124.3, 123.0, 53.2, 24.3 ppm. HRMS (ESI) calcd. for [M + Na]<sup>+</sup> C<sub>16</sub>H<sub>14</sub>N<sub>2</sub>O<sub>2</sub>Na 289.0947, found 289.0944 (1.3 ppm).

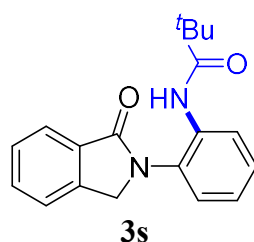

***N*-(2-(1-oxoisindolin-2-yl)phenyl)pivalamide (3s):** White solid, yield = 76%, 70.6 mg. Mp: 141-143 °C. <sup>1</sup>H NMR (300 MHz, CDCl<sub>3</sub>): δ = 8.74 (s, 1H), 7.95-7.92 (m, 1H), 7.83 (dd, *J* = 8.1, 1.5 Hz, 1H), 7.62 (ddd, *J* = 7.5, 7.5, 1.5 Hz, 1H), 7.56-7.50 (m, 2H), 7.36-7.30 (m, 1H), 7.27 (dd, *J* = 7.8, 1.8 Hz, 1H), 7.23-7.17 (m, 1H), 4.86 (s, 2H), 1.18 (s, 9H) ppm. <sup>13</sup>C{<sup>1</sup>H} NMR (75 MHz, CDCl<sub>3</sub>): δ = 177.5, 168.2, 141.9, 133.6, 132.4, 131.6, 131.0, 128.6, 127.7, 127.2, 125.8, 124.9, 124.1, 123.0, 53.2, 39.5, 27.5 ppm. HRMS (ESI) calcd. for [M + Na]<sup>+</sup> C<sub>19</sub>H<sub>20</sub>N<sub>2</sub>O<sub>2</sub>Na 331.1417, found 331.1415 (0.6 ppm).

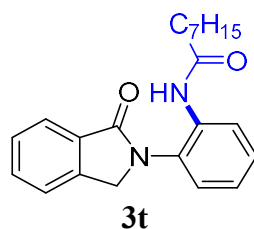

***N*-(2-(1-oxoisindolin-2-yl)phenyl)octanamide (3t):** White solid, yield = 80%, 84.9 mg. Mp: 86-88 °C. <sup>1</sup>H NMR (300 MHz, CDCl<sub>3</sub>): δ = 8.60 (s, 1H), 7.88 (d, *J* = 7.5 Hz, 1H), 7.80 (d, *J* = 8.1 Hz, 1H), 7.61 (dd, *J* = 7.8, 6.9 Hz, 1H), 7.51 (dd, *J* = 7.2, 6.6 Hz, 2H), 7.34-7.17 (m, 3H), 4.83 (s, 2H), 2.26 (t, *J* = 7.5 Hz, 2H), 1.62-1.52 (m, 2H), 1.21-1.03 (m, 8H), 0.80 (t, *J* = 7.2 Hz, 3H) ppm. <sup>13</sup>C{<sup>1</sup>H} NMR (75 MHz, CDCl<sub>3</sub>): δ = 172.1, 168.3, 141.9, 133.4, 132.3, 131.6, 130.8, 128.5, 127.8, 127.0, 125.8, 125.1, 124.2, 122.9, 53.1, 37.6, 31.6, 29.1, 29.0, 25.6, 22.5, 14.1 ppm. HRMS (ESI) calcd. for [M + H]<sup>+</sup> C<sub>22</sub>H<sub>27</sub>N<sub>2</sub>O<sub>2</sub> 351.2067, found 351.2053 (4 ppm).

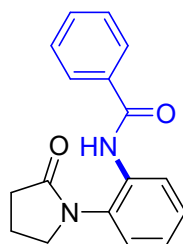

4

***N*-(2-(2-oxopyrrolidin-1-yl)phenyl)benzamide (4)**: White solid, yield = 60%, 50.1 mg.  $^1\text{H}$  NMR (400 MHz,  $\text{CDCl}_3$ ):  $\delta$  = 9.43 (s, 1H), 7.98 (d,  $J$  = 7.2 Hz, 2H), 7.94 (d,  $J$  = 8.4 Hz, 1H), 7.55-7.46 (m, 3H), 7.36-7.32 (m, 1H), 7.23-7.20 (m, 2H), 3.91 (t,  $J$  = 7.2 Hz, 2H), 2.62 (t,  $J$  = 7.6 Hz, 2H), 2.22-2.15 (m, 2H) ppm.  $^{13}\text{C}\{^1\text{H}\}$  NMR (100 MHz,  $\text{CDCl}_3$ ):  $\delta$  = 175.5, 165.3, 134.4, 132.6, 131.9, 131.4, 128.8, 127.45, 127.42, 126.8, 125.7, 123.2, 51.4, 32.1, 19.3 ppm. HRMS (ESI) calcd. for  $[\text{M} + \text{H}]^+$   $\text{C}_{17}\text{H}_{17}\text{N}_2\text{O}_2$  281.1290, found 281.1297 (2 ppm).

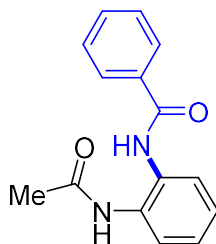

5

***N*-(2-acetamidophenyl)benzamide (5)**: White solid, yield = 51%, 39.0 mg.  $^1\text{H}$  NMR (400 MHz,  $\text{CDCl}_3$ ):  $\delta$  = 9.51 (s, 1H), 8.76 (s, 1H), 7.95 (d,  $J$  = 7.6 Hz, 2H), 7.59-7.49 (m, 4H), 7.06-7.02 (m, 2H), 6.92 (dd,  $J$  = 7.6, 7.6 Hz, 1H), 2.03 (s, 3H) ppm.  $^{13}\text{C}\{^1\text{H}\}$  NMR (100 MHz,  $\text{CDCl}_3$ ):  $\delta$  = 170.4, 168.6, 133.7, 132.3, 130.9, 130.6, 128.8, 128.6, 127.6, 127.4, 126.4, 126.2, 126.0, 125.1, 23.6 ppm. The spectral data match those previously reported.<sup>8</sup>

## 8. Substrate limitations for the catalysis

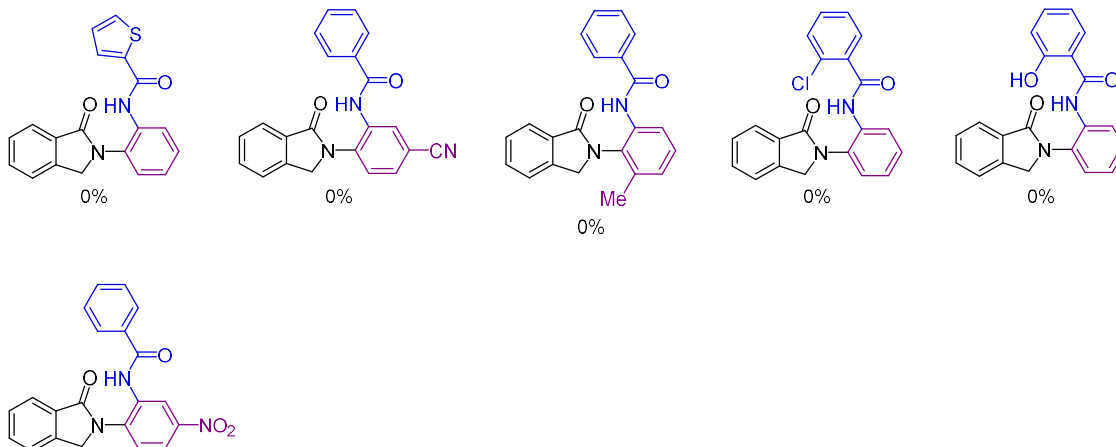

## 9. References.

- [1] Y. Zhou, P. Chen, X. Lv, J. Niu, Y. Wang, M. Lei, L. Hu, *Tetrahedron Letters*, **2017**, 58, 2232.
- [2] Y. Tian, J. Wei, M. Wang, G. Li, F. Xu, *Tetrahedron Letters*, **2018**, 59, 1866.
- [3] J.-C. Hsieh, C.-H. Cheng, *Chem. Commun.*, **2005**, 36, 4554.
- [4] X. Shi, W. Xu, R. Wang, X. Zeng, H. Qiu, M. Wang, *J. Org. Chem.* **2020**, 85, 3911.
- [5] X. Mi, W. Feng, C. Pi, X. Cui, *J. Org. Chem.* **2019**, 84, 5305.
- [6] L. Liu, H. Song, Y.-H. Liu, L.-S. Wu, B.-F. Shi, *ACS Catal.* **2020**, 10, 7117.
- [7] Y. Park, K. T. Park, J. G. Kim, S. Chang, *J. Am. Chem. Soc.* **2015**, 137, 4534.
- [8] V. Bizet, C. Bolm, *Eur. J. Org. Chem.* **2015**, 2854.
- [9] M. D. Reddy, A. N. Blanton, E. B. Watkins, *J. Org. Chem.* **2017**, 82, 5080.

## 10. X-ray crystallographic data for 3c (CCDC- 2149748).

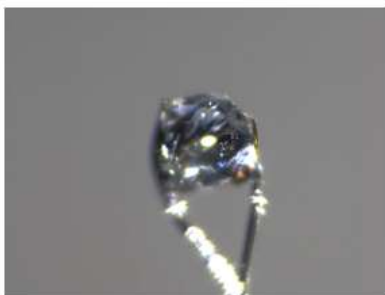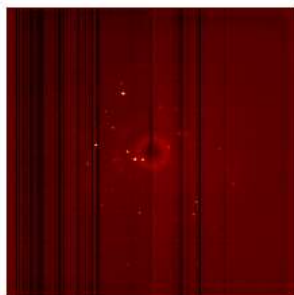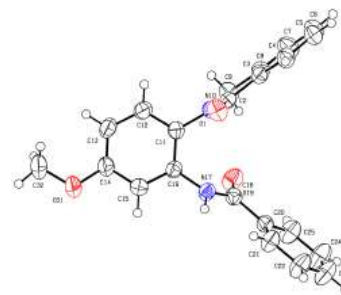

(C<sub>22</sub>H<sub>18</sub>N<sub>2</sub>O<sub>3</sub>);  $M = 358.38$ . A suitable crystal for X-ray diffraction single crystal experiment (colourless prism, dimensions = 0.400 x 0.320 x 0.160 mm) was selected and mounted with a cryoloop on the goniometer head of a D8 Venture diffractometer equipped with a (CMOS) PHOTON 100 detector,<sup>[\*]</sup> using Mo-K $\alpha$  radiation ( $\lambda = 0.71073$  Å, multilayer monochromator) at  $T = 296(2)$  K. Crystal structure has been described in monoclinic symmetry and  $P 2_1/n$  (I.T.#14) centric space group. Cell parameters have been refined as follows:  $a = 10.0892(6)$ ,  $b = 10.3198(7)$ ,  $c = 17.8299(11)$  Å,  $\beta = 100.596(2)^\circ$ ,  $V = 1824.8(2)$  Å<sup>3</sup>. Number of formula unit  $Z$  is equal to 4 and calculated density  $d$  and absorption coefficient  $\mu$  values are 1.305 g.cm<sup>-3</sup> and 0.088 mm<sup>-1</sup> respectively. The structure was solved by dual-space algorithm using the *SHELXT* program,<sup>[1]</sup> and then refined with full-matrix least-squares methods based on  $F^2$  (*SHELXL* program).<sup>[2]</sup> The contribution of the disordered solvents to the calculated structure factors was estimated following the *BYPASS* algorithm,<sup>[19]</sup> implemented as the *SQUEEZE* option in *PLATON*.<sup>[20]</sup> All non-Hydrogen atoms were refined with anisotropic atomic displacement parameters. Except Hydrogen atom linked to Nitrogen atom that was introduced in the structural model through Fourier difference maps analysis, H atoms were finally included in their calculated positions and treated as riding on their parent atom with constrained thermal parameters. A final refinement on  $F^2$  with 4147 unique intensities and 249 parameters converged at  $\omega R(F^2) = 0.1340$  ( $R_F = 0.0529$ ) for 3259 observed reflections with ( $I > 2\sigma$ ).

[\*] Thanks to FEDER funds.

[1] G. M. Sheldrick, *Acta Cryst.* **2015**, *A71*, 3-8.

[2] G. M. Sheldrick, *Acta Cryst.* **2015**, *C71*, 3-8.

### 10.1. Data collection strategy details.

Software: BIS V6.2.1/2016-03-01

Number of scans: 2

Total number of frames [\*]: 580

Total length of scans [\*]: 380.00 (deg.)

Rotation speed [\*]: 28.83 sec./deg.

Total exposition time [\*]: 2 h 25.3 min.

[\*] fast scan not included

Measurement mode: shutterless mode

| Scan  | Time(s) | Width | DX (mm) | Frames | Theta | Omega  | Phi    | Chi   | T(K)   |
|-------|---------|-------|---------|--------|-------|--------|--------|-------|--------|
| ..... |         |       |         |        |       |        |        |       |        |
| ....  |         |       |         |        |       |        |        |       |        |
| 1 Phi | 20.0    | 0.50  | 34.0    | 400    | 0.27  | 270.94 | 324.00 | 23.00 | 251.89 |
| 2 Phi | 4.0     | 1.00  | 34.0    | 180    | 0.00  | 0.00   | 0.00   | 54.74 | 251.89 |

## 10.2. Structural data.

### ... Crystal data ...

|                             |                                                                                     |
|-----------------------------|-------------------------------------------------------------------------------------|
| Empirical formula           | C <sub>22</sub> H <sub>18</sub> N <sub>2</sub> O <sub>3</sub>                       |
| Formula weight              | 358.38 g/mol                                                                        |
| Temperature                 | 296(2) K                                                                            |
| Radiation type              | Mo-K $\alpha$                                                                       |
| Wavelength                  | 0.71073 Å                                                                           |
| Crystal system, space group | monoclinic, <i>P</i> 2 <sub>1</sub> /n                                              |
| Unit cell dimensions        | a = 10.0896(6) Å<br>b = 10.3198(7) Å<br>c = 17.8299(11) Å<br>$\beta$ = 100.596(2) ° |
| Volume                      | 1824.8(2) Å <sup>3</sup>                                                            |
| Z, Calculated density       | 4, 1.305 g.cm <sup>-3</sup>                                                         |
| Absorption coefficient      | 0.088 mm <sup>-1</sup>                                                              |
| F(000)                      | 752                                                                                 |
| Crystal size                | 0.400 x 0.320 x 0.160 mm                                                            |
| Crystal color               | colourless                                                                          |
| Crystal description         | prism                                                                               |

### ... Data collection ...

|                                                               |                                |
|---------------------------------------------------------------|--------------------------------|
| Diffractometer                                                | D8 Venture diffractometer      |
| $\Theta$ range for data collection                            | 2.166 to 27.497 °              |
| ( $\sin \Theta / \lambda$ ) <sub>max</sub> (Å <sup>-1</sup> ) | 0.650                          |
| h <sub>min</sub> , h <sub>max</sub>                           | -13, 12                        |
| k <sub>min</sub> , k <sub>max</sub>                           | -13, 11                        |
| l <sub>min</sub> , l <sub>max</sub>                           | -22, 23                        |
| Reflections collected / unique                                | 13746 / 4147 [R(int) = 0.0370] |
| Reflections [ <i>I</i> > 2 $\sigma$ ]                         | 3259                           |
| Completeness to $\Theta$ <sub>max</sub>                       | 0.989                          |
| Absorption correction type                                    | multi-scan                     |
| Max. and min. transmission                                    | 0.986 , 0.878                  |

### ... Refinement ...

|                                                           |                                                                                  |
|-----------------------------------------------------------|----------------------------------------------------------------------------------|
| Refinement method                                         | Full-matrix least-squares on <i>F</i> <sup>2</sup>                               |
| H-atom treatment                                          | H-atom parameters treated by a mixture of independent and constrained refinement |
| Data / restraints / parameters                            | 4147 / 0 / 249                                                                   |
| Goodness-of-fit                                           | 1.049                                                                            |
| Final R indices [ <i>I</i> > 2 $\sigma$ ]                 | <i>R</i> <sub>1</sub> = 0.0529, $\omega R$ <sub>2</sub> = 0.1340                 |
| R indices (all data)                                      | <i>R</i> <sub>1</sub> = 0.0677, $\omega R$ <sub>2</sub> = 0.1460                 |
| $\Delta\rho$ <sub>max</sub> , $\Delta\rho$ <sub>min</sub> | 0.267, -0.370 e.Å <sup>-3</sup>                                                  |

### 10.3. Fractional atomic coordinates, site occupancy (%) and equivalent isotropic displacement parameters ( $\text{\AA}^2$ ).

$U(\text{eq})$  is defined as one third of the trace of the orthogonalized  $U_{ij}$  tensor.

| Atom | x           | y           | z           | occ. | $U(\text{eq})$ | adp  |
|------|-------------|-------------|-------------|------|----------------|------|
| O1   | 0.44717(11) | 0.58441(13) | 0.62915(8)  | 1    | 0.0492(3)      | Uani |
| C2   | 0.32916(15) | 0.62043(15) | 0.61795(9)  | 1    | 0.0356(3)      | Uani |
| C3   | 0.27266(16) | 0.73561(15) | 0.65019(9)  | 1    | 0.0375(4)      | Uani |
| C4   | 0.33871(19) | 0.83082(17) | 0.69799(10) | 1    | 0.0475(4)      | Uani |
| H4   | 0.431768    | 0.828880    | 0.714006    | 1    | 0.057          | Uiso |
| C5   | 0.2614(2)   | 0.92867(19) | 0.72100(11) | 1    | 0.0542(5)      | Uani |
| H5   | 0.302833    | 0.993792    | 0.753053    | 1    | 0.065          | Uiso |
| C6   | 0.1229(2)   | 0.9305(2)   | 0.69673(12) | 1    | 0.0585(5)      | Uani |
| H6   | 0.072726    | 0.996782    | 0.713161    | 1    | 0.070          | Uiso |
| C7   | 0.0575(2)   | 0.8360(2)   | 0.64861(12) | 1    | 0.0550(5)      | Uani |
| H7   | -0.035372   | 0.838658    | 0.632026    | 1    | 0.066          | Uiso |
| C8   | 0.13459(17) | 0.73712(17) | 0.62579(10) | 1    | 0.0411(4)      | Uani |
| C9   | 0.09356(16) | 0.62213(18) | 0.57550(11) | 1    | 0.0455(4)      | Uani |
| H9A  | 0.033345    | 0.565679    | 0.596993    | 1    | 0.055          | Uiso |
| H9B  | 0.050034    | 0.648582    | 0.524722    | 1    | 0.055          | Uiso |
| N10  | 0.22339(13) | 0.55868(13) | 0.57426(8)  | 1    | 0.0377(3)      | Uani |
| C11  | 0.23552(15) | 0.43390(15) | 0.54149(9)  | 1    | 0.0363(3)      | Uani |
| C12  | 0.19426(18) | 0.32545(17) | 0.57654(10) | 1    | 0.0439(4)      | Uani |
| H12  | 0.153117    | 0.336012    | 0.618727    | 1    | 0.053          | Uiso |
| C13  | 0.2126(2)   | 0.20170(18) | 0.55051(10) | 1    | 0.0506(5)      | Uani |
| H13  | 0.183051    | 0.130040    | 0.574466    | 1    | 0.061          | Uiso |
| C14  | 0.2752(2)   | 0.18589(17) | 0.48857(11) | 1    | 0.0529(5)      | Uani |
| C15  | 0.3136(2)   | 0.29379(17) | 0.45126(10) | 1    | 0.0474(4)      | Uani |
| H15  | 0.353688    | 0.282656    | 0.408731    | 1    | 0.057          | Uiso |
| C16  | 0.29299(16) | 0.41759(15) | 0.47646(9)  | 1    | 0.0370(4)      | Uani |
| N17  | 0.33518(14) | 0.52484(13) | 0.43669(8)  | 1    | 0.0389(3)      | Uani |
| H17  | 0.412(2)    | 0.5138(19)  | 0.4213(11)  | 1    | 0.047          | Uiso |
| C18  | 0.24601(16) | 0.61340(15) | 0.40075(9)  | 1    | 0.0377(4)      | Uani |
| O19  | 0.12648(12) | 0.61207(13) | 0.40571(8)  | 1    | 0.0535(4)      | Uani |
| C20  | 0.29922(16) | 0.71406(16) | 0.35356(9)  | 1    | 0.0375(4)      | Uani |
| C21  | 0.43416(18) | 0.73005(19) | 0.35151(11) | 1    | 0.0500(4)      | Uani |
| H21  | 0.497872    | 0.675929    | 0.380132    | 1    | 0.060          | Uiso |
| C22  | 0.4748(2)   | 0.8265(2)   | 0.30694(13) | 1    | 0.0639(6)      | Uani |
| H22  | 0.565907    | 0.836274    | 0.305435    | 1    | 0.077          | Uiso |
| C23  | 0.3821(2)   | 0.9082(2)   | 0.26478(12) | 1    | 0.0655(6)      | Uani |
| H23  | 0.410427    | 0.973984    | 0.235774    | 1    | 0.079          | Uiso |
| C24  | 0.2476(2)   | 0.8919(2)   | 0.26583(13) | 1    | 0.0701(7)      | Uani |
| H24  | 0.184203    | 0.945724    | 0.236651    | 1    | 0.084          | Uiso |
| C25  | 0.20615(19) | 0.7959(2)   | 0.31009(12) | 1    | 0.0561(5)      | Uani |
| H25  | 0.114810    | 0.785873    | 0.310856    | 1    | 0.067          | Uiso |
| O31  | 0.3021(2)   | 0.06907(14) | 0.45863(9)  | 1    | 0.0871(6)      | Uani |
| C32  | 0.2858(5)   | -0.0433(3)  | 0.50044(18) | 1    | 0.151(2)       | Uani |
| H32A | 0.329678    | -0.031860   | 0.552538    | 1    | 0.226          | Uiso |
| H32B | 0.325082    | -0.115847   | 0.478841    | 1    | 0.226          | Uiso |



H32C 0.191454 -0.059105 0.498518 1 0.226 Uiso

#### 10.4. Anisotropic displacement parameters ( $\text{\AA}^2$ ).

The anisotropic displacement factor exponent takes the form:  $-2\pi[h^2a^{*2}U_{11}+\dots+2hka^*b^*U_{12}]$

| Atom | U11        | U22        | U33        | U23         | U13         | U12         |
|------|------------|------------|------------|-------------|-------------|-------------|
| O1   | 0.0335(6)  | 0.0501(7)  | 0.0619(8)  | -0.0061(6)  | 0.0034(5)   | 0.0027(5)   |
| C2   | 0.0341(8)  | 0.0367(8)  | 0.0365(8)  | 0.0035(6)   | 0.0077(6)   | -0.0033(6)  |
| C3   | 0.0407(8)  | 0.0353(8)  | 0.0372(8)  | 0.0033(6)   | 0.0092(6)   | -0.0028(6)  |
| C4   | 0.0503(10) | 0.0415(9)  | 0.0491(10) | -0.0014(8)  | 0.0052(8)   | -0.0067(8)  |
| C5   | 0.0721(13) | 0.0428(10) | 0.0488(10) | -0.0084(8)  | 0.0139(9)   | -0.0068(9)  |
| C6   | 0.0696(13) | 0.0486(11) | 0.0614(12) | -0.0081(9)  | 0.0229(10)  | 0.0089(9)   |
| C7   | 0.0458(10) | 0.0585(12) | 0.0631(12) | -0.0075(9)  | 0.0162(9)   | 0.0074(8)   |
| C8   | 0.0395(8)  | 0.0437(9)  | 0.0414(8)  | -0.0001(7)  | 0.0107(7)   | 0.0000(7)   |
| C9   | 0.0319(8)  | 0.0511(10) | 0.0534(10) | -0.0086(8)  | 0.0079(7)   | -0.0008(7)  |
| N10  | 0.0330(7)  | 0.0386(7)  | 0.0417(7)  | -0.0042(6)  | 0.0074(5)   | -0.0018(5)  |
| C11  | 0.0345(8)  | 0.0353(8)  | 0.0381(8)  | -0.0013(6)  | 0.0039(6)   | -0.0020(6)  |
| C12  | 0.0487(9)  | 0.0459(10) | 0.0375(8)  | 0.0018(7)   | 0.0085(7)   | -0.0066(7)  |
| C13  | 0.0672(12) | 0.0389(9)  | 0.0444(9)  | 0.0065(7)   | 0.0070(8)   | -0.0117(8)  |
| C14  | 0.0799(14) | 0.0338(9)  | 0.0442(9)  | -0.0023(7)  | 0.0089(9)   | -0.0044(8)  |
| C15  | 0.0638(11) | 0.0415(10) | 0.0382(9)  | -0.0016(7)  | 0.0131(8)   | -0.0013(8)  |
| C16  | 0.0386(8)  | 0.0344(8)  | 0.0377(8)  | 0.0019(6)   | 0.0064(6)   | -0.0031(6)  |
| N17  | 0.0379(7)  | 0.0366(7)  | 0.0442(7)  | 0.0047(6)   | 0.0127(6)   | -0.0007(6)  |
| C18  | 0.0378(8)  | 0.0360(8)  | 0.0395(8)  | -0.0034(6)  | 0.0077(6)   | -0.0033(6)  |
| O19  | 0.0380(7)  | 0.0570(8)  | 0.0672(9)  | 0.0139(7)   | 0.0141(6)   | 0.0007(6)   |
| C20  | 0.0412(8)  | 0.0352(8)  | 0.0353(8)  | -0.0010(6)  | 0.0049(6)   | -0.0025(6)  |
| C21  | 0.0420(9)  | 0.0485(10) | 0.0595(11) | 0.0142(9)   | 0.0095(8)   | -0.0001(8)  |
| C22  | 0.0508(11) | 0.0664(14) | 0.0753(14) | 0.0246(11)  | 0.0138(10)  | -0.0098(10) |
| C23  | 0.0692(13) | 0.0642(13) | 0.0603(12) | 0.0267(10)  | 0.0049(10)  | -0.0139(11) |
| C24  | 0.0633(13) | 0.0708(15) | 0.0694(14) | 0.0339(12)  | -0.0058(11) | -0.0012(11) |
| C25  | 0.0431(10) | 0.0616(12) | 0.0600(12) | 0.0163(9)   | -0.0006(8)  | -0.0018(9)  |
| O31  | 0.1711(19) | 0.0339(8)  | 0.0619(9)  | -0.0048(7)  | 0.0361(11)  | -0.0032(9)  |
| C32  | 0.342(7)   | 0.0337(13) | 0.092(2)   | -0.0014(13) | 0.083(3)    | -0.003(2)   |

#### 10.5. Bond length [ $\text{\AA}$ ].

O1 - C2 = 1.2281(19)  
 C2 - N10 = 1.359(2)  
 C2 - C3 = 1.479(2)  
 C3 - C8 = 1.381(2)  
 C3 - C4 = 1.388(2)  
 C4 - C5 = 1.383(3)  
 C4 - H4 = 0.9300  
 C5 - C6 = 1.385(3)  
 C5 - H5 = 0.9300  
 C6 - C7 = 1.384(3)

C6 - H6 = 0.9300  
C7 - C8 = 1.388(2)  
C7 - H7 = 0.9300  
C8 - C9 = 1.499(2)  
C9 - N10 = 1.468(2)  
C9 - H9A = 0.9700  
C9 - H9B = 0.9700  
N10 - C11 = 1.429(2)  
C11 - C12 = 1.383(2)  
C11 - C16 = 1.399(2)  
C12 - C13 = 1.383(3)  
C12 - H12 = 0.9300  
C13 - C14 = 1.379(3)  
C13 - H13 = 0.9300  
C14 - O31 = 1.366(2)  
C14 - C15 = 1.388(3)  
C15 - C16 = 1.383(2)  
C15 - H15 = 0.9300  
C16 - N17 = 1.421(2)  
N17 - C18 = 1.358(2)  
N17 - H17 = 0.87(2)  
C18 - O19 = 1.2254(19)  
C18 - C20 = 1.497(2)  
C20 - C21 = 1.379(2)  
C20 - C25 = 1.389(2)  
C21 - C22 = 1.382(3)  
C21 - H21 = 0.9300  
C22 - C23 = 1.376(3)  
C22 - H22 = 0.9300  
C23 - C24 = 1.371(3)  
C23 - H23 = 0.9300  
C24 - C25 = 1.379(3)  
C24 - H24 = 0.9300  
C25 - H25 = 0.9300  
O31 - C32 = 1.405(3)  
C32 - H32A = 0.9600  
C32 - H32B = 0.9600  
C32 - H32C = 0.9600

#### **10.6. Angles [°].**

O1 - C2 - N10 = 125.95(15)  
O1 - C2 - C3 = 127.68(15)  
N10 - C2 - C3 = 106.35(13)  
C8 - C3 - C4 = 121.87(16)  
C8 - C3 - C2 = 108.97(14)  
C4 - C3 - C2 = 129.16(15)  
C5 - C4 - C3 = 117.75(18)  
C5 - C4 - H4 = 121.1  
C3 - C4 - H4 = 121.1

C4 - C5 - C6 = 120.57(18)  
C4 - C5 - H5 = 119.7  
C6 - C5 - H5 = 119.7  
C7 - C6 - C5 = 121.53(18)  
C7 - C6 - H6 = 119.2  
C5 - C6 - H6 = 119.2  
C6 - C7 - C8 = 118.09(18)  
C6 - C7 - H7 = 121.0  
C8 - C7 - H7 = 121.0  
C3 - C8 - C7 = 120.18(17)  
C3 - C8 - C9 = 109.34(14)  
C7 - C8 - C9 = 130.48(16)  
N10 - C9 - C8 = 102.30(13)  
N10 - C9 - H9A = 111.3  
C8 - C9 - H9A = 111.3  
N10 - C9 - H9B = 111.3  
C8 - C9 - H9B = 111.3  
H9A - C9 - H9B = 109.2  
C2 - N10 - C11 = 122.68(13)  
C2 - N10 - C9 = 113.02(13)  
C11 - N10 - C9 = 123.50(13)  
C12 - C11 - C16 = 118.84(15)  
C12 - C11 - N10 = 119.29(14)  
C16 - C11 - N10 = 121.82(14)  
C13 - C12 - C11 = 121.73(16)  
C13 - C12 - H12 = 119.1  
C11 - C12 - H12 = 119.1  
C14 - C13 - C12 = 119.16(16)  
C14 - C13 - H13 = 120.4  
C12 - C13 - H13 = 120.4  
O31 - C14 - C13 = 124.80(17)  
O31 - C14 - C15 = 115.33(17)  
C13 - C14 - C15 = 119.86(17)  
C16 - C15 - C14 = 120.92(16)  
C16 - C15 - H15 = 119.5  
C14 - C15 - H15 = 119.5  
C15 - C16 - C11 = 119.38(15)  
C15 - C16 - N17 = 118.74(15)  
C11 - C16 - N17 = 121.85(14)  
C18 - N17 - C16 = 121.76(14)  
C18 - N17 - H17 = 119.2(13)  
C16 - N17 - H17 = 114.7(13)  
O19 - C18 - N17 = 122.27(15)  
O19 - C18 - C20 = 120.51(15)  
N17 - C18 - C20 = 117.22(14)  
C21 - C20 - C25 = 118.82(16)  
C21 - C20 - C18 = 123.78(15)  
C25 - C20 - C18 = 117.40(15)  
C20 - C21 - C22 = 120.02(17)  
C20 - C21 - H21 = 120.0

C22 - C21 - H21 = 120.0  
C23 - C22 - C21 = 120.77(19)  
C23 - C22 - H22 = 119.6  
C21 - C22 - H22 = 119.6  
C24 - C23 - C22 = 119.55(19)  
C24 - C23 - H23 = 120.2  
C22 - C23 - H23 = 120.2  
C23 - C24 - C25 = 120.04(19)  
C23 - C24 - H24 = 120.0  
C25 - C24 - H24 = 120.0  
C24 - C25 - C20 = 120.79(18)  
C24 - C25 - H25 = 119.6  
C20 - C25 - H25 = 119.6  
C14 - O31 - C32 = 118.05(19)  
O31 - C32 - H32A = 109.5  
O31 - C32 - H32B = 109.5  
H32A - C32 - H32B = 109.5  
O31 - C32 - H32C = 109.5  
H32A - C32 - H32C = 109.5  
H32B - C32 - H32C = 109.5

#### 10.7. Torsion angles [°].

O1 - C2 - C3 - C8 = -177.23(16)  
N10 - C2 - C3 - C8 = 1.19(18)  
O1 - C2 - C3 - C4 = 2.1(3)  
N10 - C2 - C3 - C4 = -179.42(16)  
C8 - C3 - C4 - C5 = 0.1(3)  
C2 - C3 - C4 - C5 = -179.22(16)  
C3 - C4 - C5 - C6 = 0.0(3)  
C4 - C5 - C6 - C7 = -0.5(3)  
C5 - C6 - C7 - C8 = 0.9(3)  
C4 - C3 - C8 - C7 = 0.3(3)  
C2 - C3 - C8 - C7 = 179.78(16)  
C4 - C3 - C8 - C9 = -179.73(16)  
C2 - C3 - C8 - C9 = -0.30(19)  
C6 - C7 - C8 - C3 = -0.8(3)  
C6 - C7 - C8 - C9 = 179.27(19)  
C3 - C8 - C9 - N10 = -0.63(19)  
C7 - C8 - C9 - N10 = 179.28(19)  
O1 - C2 - N10 - C11 = 6.7(3)  
C3 - C2 - N10 - C11 = -171.72(13)  
O1 - C2 - N10 - C9 = 176.80(16)  
C3 - C2 - N10 - C9 = -1.67(18)  
C8 - C9 - N10 - C2 = 1.46(19)  
C8 - C9 - N10 - C11 = 171.42(14)  
C2 - N10 - C11 - C12 = 99.90(18)  
C9 - N10 - C11 - C12 = -69.1(2)  
C2 - N10 - C11 - C16 = -77.5(2)  
C9 - N10 - C11 - C16 = 113.47(18)

C16 - C11 - C12 - C13 = 2.2(3)  
N10 - C11 - C12 - C13 = -175.26(16)  
C11 - C12 - C13 - C14 = 0.9(3)  
C12 - C13 - C14 - O31 = 178.3(2)  
C12 - C13 - C14 - C15 = -2.8(3)  
O31 - C14 - C15 - C16 = -179.38(18)  
C13 - C14 - C15 - C16 = 1.6(3)  
C14 - C15 - C16 - C11 = 1.5(3)  
C14 - C15 - C16 - N17 = 179.44(17)  
C12 - C11 - C16 - C15 = -3.4(2)  
N10 - C11 - C16 - C15 = 174.06(15)  
C12 - C11 - C16 - N17 = 178.74(15)  
N10 - C11 - C16 - N17 = -3.8(2)  
C15 - C16 - N17 - C18 = 117.27(18)  
C11 - C16 - N17 - C18 = -64.8(2)  
C16 - N17 - C18 - O19 = 6.1(2)  
C16 - N17 - C18 - C20 = -173.49(14)  
O19 - C18 - C20 - C21 = 173.03(18)  
N17 - C18 - C20 - C21 = -7.4(2)  
O19 - C18 - C20 - C25 = -6.5(2)  
N17 - C18 - C20 - C25 = 173.13(16)  
C25 - C20 - C21 - C22 = 0.2(3)  
C18 - C20 - C21 - C22 = -179.30(19)  
C20 - C21 - C22 - C23 = 0.6(3)  
C21 - C22 - C23 - C24 = -1.3(4)  
C22 - C23 - C24 - C25 = 1.3(4)  
C23 - C24 - C25 - C20 = -0.5(4)  
C21 - C20 - C25 - C24 = -0.2(3)  
C18 - C20 - C25 - C24 = 179.29(19)  
C13 - C14 - O31 - C32 = -11.0(4)  
C15 - C14 - O31 - C32 = 170.1(3)

## 10.8. Structure visualization.

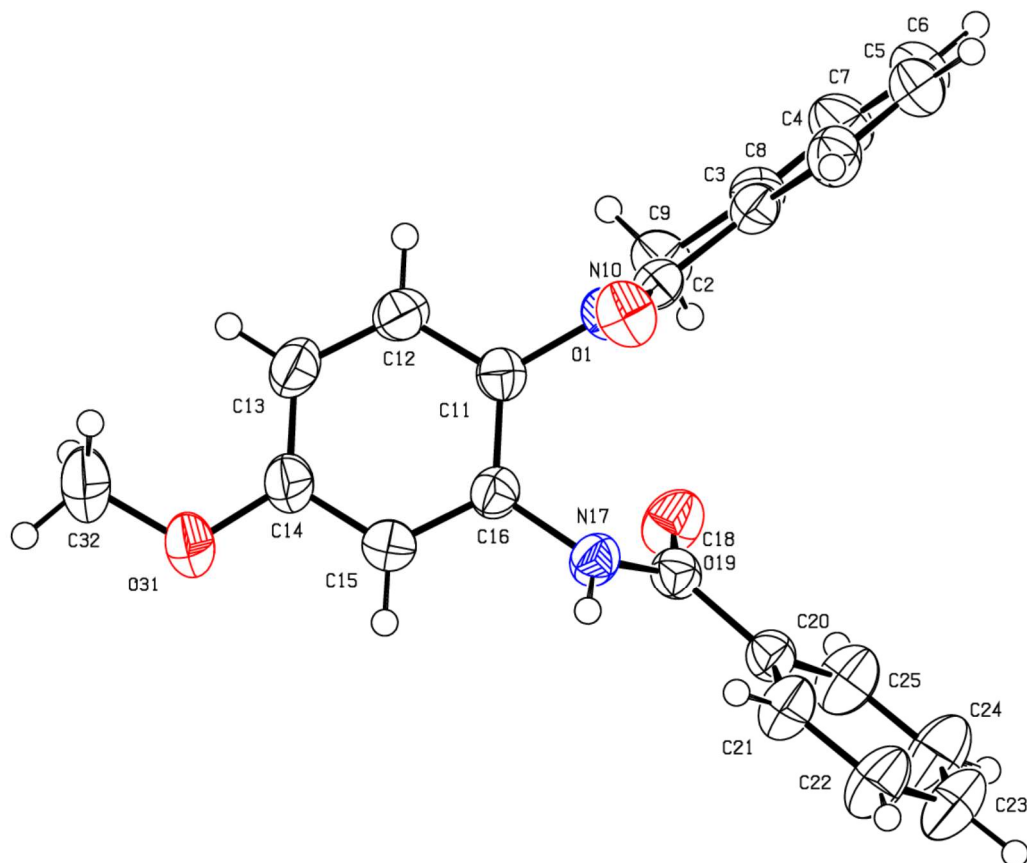

## 11. XYZ coordinates and absolute energies (in a.u.) of all DFT computed species.

2

AgCl SCF Done: -607.202619969 A.U.

|    |          |          |           |
|----|----------|----------|-----------|
| Ag | 0.000000 | 0.000000 | 0.612233  |
| Cl | 0.000000 | 0.000000 | -1.692644 |

1

Cl- SCF Done: -460.124609119 A.U.

|    |          |          |          |
|----|----------|----------|----------|
| Cl | 0.000000 | 0.000000 | 0.000000 |
|----|----------|----------|----------|

3

CO2 SCF Done: -188.454651986 A.U.

|   |          |          |           |
|---|----------|----------|-----------|
| O | 0.000000 | 0.000000 | 1.175478  |
| C | 0.000000 | 0.000000 | 0.000000  |
| O | 0.000000 | 0.000000 | -1.175478 |

54

DIMER SCF Done: -2809.21038445 A.U.

|    |           |           |           |
|----|-----------|-----------|-----------|
| Ru | -1.786325 | 0.539802  | 0.291138  |
| C  | -3.357021 | 0.321271  | 1.782066  |
| C  | -2.733777 | -0.963167 | 1.530385  |
| C  | -2.641918 | -1.521390 | 0.222141  |
| C  | -3.097818 | -0.769471 | -0.915836 |
| C  | -3.719041 | 0.513228  | -0.691345 |
| C  | -3.855506 | 1.034812  | 0.640969  |
| H  | -2.221001 | -1.481815 | 2.355931  |
| H  | -2.055632 | -2.439724 | 0.087037  |
| H  | -4.010202 | 1.139470  | -1.548295 |
| H  | -4.218665 | 2.066092  | 0.773528  |
| C  | -2.918061 | -1.263652 | -2.346688 |
| H  | -2.464376 | -0.413964 | -2.905574 |
| C  | -3.380261 | 0.918834  | 3.164009  |
| H  | -3.409742 | 2.024759  | 3.114860  |
| C  | -1.985083 | -2.475540 | -2.479286 |
| H  | -2.439246 | -3.383643 | -2.027929 |
| H  | -1.805681 | -2.695653 | -3.551554 |
| H  | -1.007051 | -2.299368 | -1.989809 |
| C  | -4.306729 | -1.561380 | -2.957643 |
| H  | -4.977449 | -0.678010 | -2.933554 |
| H  | -4.199244 | -1.878258 | -4.015604 |
| H  | -4.808660 | -2.384852 | -2.406442 |
| H  | -2.473776 | 0.624772  | 3.729768  |
| H  | -4.271006 | 0.566102  | 3.727964  |
| Cl | 0.025969  | 0.234306  | -1.378629 |
| Cl | 0.164373  | 0.386243  | 1.827388  |
| Ru | 1.762731  | -0.536803 | 0.198102  |
| C  | 3.604188  | -1.482713 | 0.950211  |
| C  | 3.435768  | -0.186448 | 1.534234  |
| C  | 3.247406  | 0.996271  | 0.727764  |
| C  | 3.189248  | 0.911689  | -0.694457 |
| C  | 3.332187  | -0.404791 | -1.291631 |
| C  | 3.541015  | -1.569074 | -0.496128 |

|    |           |           |           |
|----|-----------|-----------|-----------|
| H  | 3.356959  | -0.102353 | 2.629755  |
| H  | 3.021764  | 1.948196  | 1.228148  |
| H  | 3.181365  | -0.516751 | -2.377411 |
| H  | 3.541115  | -2.560499 | -0.974689 |
| C  | 2.918691  | 2.110982  | -1.587129 |
| H  | 2.244329  | 1.741621  | -2.391996 |
| C  | 3.731946  | -2.726920 | 1.784795  |
| H  | 3.020590  | -3.497018 | 1.421827  |
| C  | 2.197148  | 3.261684  | -0.875449 |
| H  | 2.845867  | 3.744415  | -0.112916 |
| H  | 1.922220  | 4.045442  | -1.610011 |
| H  | 1.260275  | 2.917126  | -0.390812 |
| C  | 4.246953  | 2.563942  | -2.233143 |
| H  | 4.745762  | 1.738562  | -2.783449 |
| H  | 4.064059  | 3.391257  | -2.949625 |
| H  | 4.954361  | 2.932636  | -1.459987 |
| H  | 3.502753  | -2.521813 | 2.848304  |
| H  | 4.764389  | -3.131572 | 1.716600  |
| Cl | 0.594173  | -2.633619 | 0.340125  |
| Cl | -1.356396 | 2.879183  | 0.191252  |

68

I0"-I' SCF Done: -1499.97363004 A.U.

|    |           |           |           |
|----|-----------|-----------|-----------|
| Ru | -0.996467 | 0.305773  | -0.665841 |
| C  | -2.190576 | 0.085239  | -2.472779 |
| C  | -0.890143 | 0.614172  | -2.785693 |
| C  | -0.384444 | 1.819889  | -2.170084 |
| C  | -1.136417 | 2.491699  | -1.169107 |
| C  | -2.429506 | 1.929858  | -0.816443 |
| C  | -2.962318 | 0.779452  | -1.463202 |
| H  | -0.232040 | 0.043869  | -3.460320 |
| H  | 0.641080  | 2.142086  | -2.401085 |
| H  | -2.980673 | 2.355664  | 0.037417  |
| H  | -3.905884 | 0.345190  | -1.100047 |
| C  | -0.633007 | 3.723135  | -0.434479 |
| H  | -1.052700 | 3.662649  | 0.594215  |
| C  | -2.687617 | -1.198713 | -3.070023 |
| H  | -3.188182 | -1.819272 | -2.301874 |
| C  | 3.895967  | -1.004035 | -0.121775 |
| C  | 5.799503  | -2.413757 | -1.656479 |
| C  | 4.427015  | -2.677432 | -1.808831 |
| H  | 4.088373  | -3.441979 | -2.525044 |
| C  | 3.472105  | -1.985463 | -1.049521 |
| C  | 0.895555  | 3.799164  | -0.311637 |
| H  | 1.384001  | 3.966833  | -1.294365 |
| H  | 1.180351  | 4.649615  | 0.339066  |
| H  | 1.311899  | 2.873630  | 0.136078  |
| C  | -1.220815 | 4.978104  | -1.120201 |
| H  | -2.328426 | 4.941515  | -1.168617 |
| H  | -0.933857 | 5.891065  | -0.560000 |
| H  | -0.836381 | 5.076239  | -2.156931 |



|   |           |           |           |
|---|-----------|-----------|-----------|
| H | -1.861521 | -1.788640 | -3.510207 |
| H | -3.424018 | -0.972954 | -3.870962 |
| H | 6.541207  | -2.964031 | -2.254998 |
| C | 5.276275  | -0.742529 | 0.040189  |
| C | 6.216976  | -1.446796 | -0.726611 |
| H | 7.288474  | -1.233759 | -0.591397 |
| H | 5.633380  | 0.007903  | 0.759196  |
| C | 1.743456  | 1.987245  | 3.383838  |
| C | 2.043675  | 1.080402  | 2.358814  |
| C | 1.014341  | 0.587516  | 1.543340  |
| C | -0.338989 | 0.927697  | 1.715525  |
| C | -0.637352 | 1.848242  | 2.738815  |
| C | 0.394580  | 2.372041  | 3.550128  |
| C | 3.344409  | 0.495680  | 1.864408  |
| N | 2.948444  | -0.296336 | 0.673060  |
| C | 1.602932  | -0.181308 | 0.452359  |
| H | 2.525738  | 2.397465  | 4.040669  |
| H | 2.404909  | -2.208644 | -1.169474 |
| H | -1.685634 | 2.119214  | 2.936939  |
| H | 0.134856  | 3.081220  | 4.351410  |
| H | 3.840165  | -0.157120 | 2.615345  |
| O | 0.956984  | -0.569683 | -0.568072 |
| H | 4.067760  | 1.286635  | 1.570981  |
| H | -1.254692 | 0.347024  | 1.337604  |
| O | -1.553121 | -1.581164 | -0.059232 |
| C | -2.447942 | -1.668192 | 0.904197  |
| O | -2.872627 | -0.680405 | 1.529413  |
| C | -2.896149 | -3.116104 | 1.210987  |
| C | -3.986483 | -3.094274 | 2.296648  |
| C | -1.653832 | -3.895589 | 1.707493  |
| H | -0.862904 | -3.922345 | 0.931546  |
| H | -1.232053 | -3.431214 | 2.623452  |
| H | -1.937645 | -4.939053 | 1.956935  |
| H | -3.617175 | -2.619086 | 3.226685  |
| H | -4.303264 | -4.130922 | 2.532886  |
| H | -4.876844 | -2.524862 | 1.962401  |
| C | -3.436758 | -3.758397 | -0.086909 |
| H | -4.309286 | -3.194264 | -0.480608 |
| H | -2.654477 | -3.795479 | -0.870990 |
| H | -3.775640 | -4.795503 | 0.114972  |

68

I0"-I SCF Done: -1499.99233328 A.U.

|    |           |          |           |
|----|-----------|----------|-----------|
| Ru | -1.159541 | 0.652269 | -0.223628 |
| C  | -2.048269 | 2.656178 | -0.269692 |
| C  | -2.844998 | 1.808503 | 0.566545  |
| C  | -3.342114 | 0.545075 | 0.080242  |
| C  | -3.049717 | 0.077159 | -1.232561 |
| C  | -2.273645 | 0.961714 | -2.081677 |
| C  | -1.811315 | 2.227700 | -1.633687 |
| H  | -3.019567 | 2.099361 | 1.613743  |

|   |           |           |           |
|---|-----------|-----------|-----------|
| H | -3.871855 | -0.117641 | 0.779171  |
| H | -1.945308 | 0.594795  | -3.067641 |
| H | -1.143957 | 2.821124  | -2.277337 |
| C | -3.474673 | -1.290510 | -1.741122 |
| H | -2.686452 | -1.605047 | -2.461306 |
| C | -1.421890 | 3.920667  | 0.249517  |
| H | -0.380630 | 4.013568  | -0.118007 |
| C | -0.136490 | -1.869203 | 1.335201  |
| C | -2.248038 | -1.952168 | 3.190472  |
| C | -1.917420 | -0.752883 | 2.553219  |
| H | -2.445824 | 0.169373  | 2.838481  |
| C | -0.888105 | -0.674654 | 1.571920  |
| C | -3.551301 | -2.356984 | -0.636823 |
| H | -4.386436 | -2.164535 | 0.069124  |
| H | -3.734527 | -3.353872 | -1.084931 |
| H | -2.609005 | -2.406978 | -0.053376 |
| C | -4.807399 | -1.156258 | -2.510733 |
| H | -4.735989 | -0.414590 | -3.332783 |
| H | -5.098160 | -2.130220 | -2.954258 |
| H | -5.622854 | -0.832849 | -1.829960 |
| H | -1.405270 | 3.939002  | 1.356134  |
| H | -1.995362 | 4.802553  | -0.107125 |
| H | -3.049197 | -1.976865 | 3.944905  |
| C | -0.471187 | -3.084071 | 1.964422  |
| C | -1.534593 | -3.127075 | 2.877686  |
| H | -1.796188 | -4.080172 | 3.362533  |
| H | 0.095039  | -3.999173 | 1.734699  |
| C | 4.540506  | -2.271318 | -0.543110 |
| C | 3.175843  | -2.055540 | -0.318667 |
| C | 2.388462  | -1.401964 | -1.290821 |
| C | 2.927119  | -0.940890 | -2.503445 |
| C | 4.295098  | -1.159904 | -2.727595 |
| C | 5.088182  | -1.817602 | -1.759498 |
| C | 2.316810  | -2.370378 | 0.878598  |
| N | 1.002662  | -1.820969 | 0.492860  |
| C | 1.033155  | -1.252722 | -0.753896 |
| H | 5.173291  | -2.771463 | 0.205963  |
| H | -0.120700 | 0.292691  | 1.713802  |
| H | 4.759775  | -0.813850 | -3.663348 |
| H | 6.159795  | -1.974000 | -1.958412 |
| H | 2.667864  | -1.866597 | 1.805743  |
| O | 0.051346  | -0.695992 | -1.321675 |
| H | 2.251322  | -3.461038 | 1.081712  |
| H | 2.290967  | -0.422499 | -3.235890 |
| O | 0.731768  | 1.560632  | -0.075757 |
| C | 1.464804  | 1.546477  | 0.987160  |
| O | 1.103871  | 1.021216  | 2.076006  |
| C | 2.850805  | 2.215864  | 0.886975  |
| C | 3.898701  | 1.209844  | 1.417226  |
| C | 2.807703  | 3.469326  | 1.795081  |

|   |          |          |           |
|---|----------|----------|-----------|
| H | 2.042723 | 4.192900 | 1.443106  |
| H | 2.573629 | 3.193836 | 2.842628  |
| H | 3.792224 | 3.980506 | 1.776837  |
| H | 3.658780 | 0.893165 | 2.451318  |
| H | 4.904181 | 1.678240 | 1.416132  |
| H | 3.946915 | 0.309362 | 0.769410  |
| C | 3.174824 | 2.605014 | -0.566019 |
| H | 3.178147 | 1.714586 | -1.227562 |
| H | 2.434790 | 3.324079 | -0.969620 |
| H | 4.177990 | 3.075947 | -0.612381 |

68

IO" SCF Done: -1500.01221496 A.U.

|    |           |           |           |
|----|-----------|-----------|-----------|
| Ru | 1.500919  | -0.675300 | 0.023762  |
| C  | 2.993588  | -2.252732 | 0.219965  |
| C  | 2.569610  | -1.838218 | 1.542628  |
| C  | 2.602388  | -0.466722 | 1.917611  |
| C  | 3.062547  | 0.560742  | 1.014503  |
| C  | 3.485846  | 0.136245  | -0.288928 |
| C  | 3.477867  | -1.247511 | -0.680908 |
| H  | 2.125192  | -2.577728 | 2.226499  |
| H  | 2.154423  | -0.176312 | 2.879745  |
| H  | 3.753619  | 0.899954  | -1.037599 |
| H  | 3.738481  | -1.522135 | -1.714437 |
| C  | 3.115873  | 2.029055  | 1.407913  |
| H  | 3.042662  | 2.613131  | 0.463175  |
| C  | 2.844666  | -3.685029 | -0.210699 |
| H  | 2.815327  | -3.776632 | -1.313024 |
| C  | -3.049379 | -0.254221 | 1.495853  |
| C  | -4.345326 | -2.404680 | 2.771143  |
| C  | -3.265853 | -2.641618 | 1.901177  |
| H  | -2.926992 | -3.671619 | 1.709252  |
| C  | -2.614593 | -1.578023 | 1.258159  |
| C  | 1.966415  | 2.468769  | 2.328428  |
| H  | 2.056905  | 2.024203  | 3.341654  |
| H  | 1.983842  | 3.569268  | 2.457191  |
| H  | 0.980624  | 2.183196  | 1.912575  |
| C  | 4.496750  | 2.320998  | 2.038153  |
| H  | 5.326629  | 2.055577  | 1.351831  |
| H  | 4.586915  | 3.397928  | 2.287496  |
| H  | 4.630895  | 1.742313  | 2.976384  |
| H  | 1.916828  | -4.127693 | 0.201534  |
| H  | 3.706217  | -4.277075 | 0.166201  |
| H  | -4.851853 | -3.245801 | 3.268623  |
| C  | -4.132234 | -0.010868 | 2.367339  |
| C  | -4.776402 | -1.086626 | 2.998864  |
| H  | -5.619476 | -0.888331 | 3.678388  |
| H  | -4.470556 | 1.016739  | 2.565938  |
| C  | -2.319025 | 4.012740  | -1.115758 |
| C  | -2.184301 | 2.807568  | -0.416752 |
| C  | -0.930247 | 2.168865  | -0.315440 |

|   |           |           |           |
|---|-----------|-----------|-----------|
| C | 0.219705  | 2.711951  | -0.912926 |
| C | 0.086261  | 3.918852  | -1.614947 |
| C | -1.168615 | 4.560713  | -1.715535 |
| C | -3.209663 | 1.991014  | 0.321306  |
| N | -2.432775 | 0.845123  | 0.823711  |
| C | -1.109869 | 0.943360  | 0.480919  |
| H | -3.292564 | 4.519809  | -1.199406 |
| H | -1.777496 | -1.776587 | 0.575951  |
| H | 0.965364  | 4.369371  | -2.100462 |
| H | -1.248834 | 5.505094  | -2.275895 |
| H | -4.033637 | 1.626701  | -0.330645 |
| O | -0.247816 | 0.104355  | 0.874800  |
| H | -3.668795 | 2.562546  | 1.157206  |
| H | 1.183518  | 2.189729  | -0.845720 |
| O | 0.065523  | -2.011074 | -0.877492 |
| C | -0.137631 | -1.181760 | -1.837650 |
| O | 0.618974  | -0.138145 | -1.837357 |
| C | -1.239913 | -1.363018 | -2.868327 |
| C | -0.674983 | -1.015652 | -4.265001 |
| C | -2.367735 | -0.363215 | -2.491275 |
| H | -2.789822 | -0.596166 | -1.491877 |
| H | -1.994572 | 0.680949  | -2.489565 |
| H | -3.188667 | -0.440276 | -3.233141 |
| H | -0.279906 | 0.019129  | -4.290615 |
| H | -1.478420 | -1.104205 | -5.024162 |
| H | 0.143022  | -1.708286 | -4.551043 |
| C | -1.771887 | -2.808094 | -2.823236 |
| H | -0.974435 | -3.540354 | -3.061962 |
| H | -2.177563 | -3.058602 | -1.822883 |
| H | -2.584499 | -2.928867 | -3.567796 |

41

I0' SCF Done: -830.266459768 A.U.

|    |           |           |           |
|----|-----------|-----------|-----------|
| Ru | 0.481613  | 0.635562  | 0.037758  |
| C  | 2.456441  | 1.654523  | -0.113451 |
| C  | 2.255440  | 0.850473  | -1.285279 |
| C  | 1.851065  | -0.511890 | -1.163907 |
| C  | 1.671828  | -1.133565 | 0.133507  |
| C  | 1.966466  | -0.330696 | 1.303078  |
| C  | 2.347471  | 1.032624  | 1.183925  |
| H  | 2.282414  | 1.322182  | -2.279837 |
| H  | 1.565019  | -1.065243 | -2.071322 |
| H  | 1.769791  | -0.751424 | 2.302557  |
| H  | 2.445572  | 1.650488  | 2.090305  |
| C  | 1.190185  | -2.563119 | 0.289433  |
| H  | 0.697364  | -2.620597 | 1.285116  |
| C  | 2.723495  | 3.129423  | -0.228864 |
| H  | 2.312794  | 3.690771  | 0.633242  |
| C  | 0.172546  | -3.001174 | -0.776443 |
| H  | 0.633870  | -3.090751 | -1.782001 |
| H  | -0.230354 | -4.000642 | -0.519350 |

|   |           |           |           |
|---|-----------|-----------|-----------|
| H | -0.679860 | -2.294942 | -0.847274 |
| C | 2.437332  | -3.481531 | 0.313934  |
| H | 3.148213  | -3.196368 | 1.115881  |
| H | 2.124709  | -4.530572 | 0.490643  |
| H | 2.975908  | -3.444267 | -0.656007 |
| H | 2.313313  | 3.551691  | -1.166555 |
| H | 3.824243  | 3.291942  | -0.238098 |
| O | -1.267402 | 0.325507  | 1.134256  |
| C | -1.976797 | 0.319885  | 0.049132  |
| O | -1.281255 | 0.408074  | -1.044641 |
| C | -3.471852 | 0.143665  | 0.043803  |
| C | -3.688342 | -1.379741 | -0.219376 |
| C | -4.088827 | 0.972236  | -1.105147 |
| H | -3.934090 | 2.058551  | -0.944393 |
| H | -3.652646 | 0.697840  | -2.085656 |
| H | -5.180382 | 0.784111  | -1.144385 |
| H | -3.275106 | -1.681815 | -1.202690 |
| H | -4.778163 | -1.585582 | -0.222625 |
| H | -3.223393 | -1.998432 | 0.575029  |
| C | -4.060056 | 0.541141  | 1.412237  |
| H | -3.612002 | -0.047225 | 2.236960  |
| H | -3.894423 | 1.616571  | 1.624982  |
| H | -5.152873 | 0.356812  | 1.407703  |

32

I0 SCF Done: -1088.19548937 A.U.

|    |          |           |           |
|----|----------|-----------|-----------|
| Ru | 0.731799 | 0.456810  | 0.023408  |
| C  | 1.922404 | 2.286792  | -0.117109 |
| C  | 2.154815 | 1.451127  | -1.274483 |
| C  | 2.523511 | 0.080360  | -1.130179 |
| C  | 2.688284 | -0.530185 | 0.169323  |
| C  | 2.462370 | 0.308356  | 1.311168  |
| C  | 2.087647 | 1.689583  | 1.177793  |
| H  | 1.929288 | 1.845916  | -2.278122 |
| H  | 2.558378 | -0.552767 | -2.030643 |
| H  | 2.453203 | -0.148882 | 2.314478  |
| H  | 1.811817 | 2.262802  | 2.077315  |
| C  | 3.022153 | -2.000914 | 0.334361  |
| H  | 2.697060 | -2.285381 | 1.359301  |
| C  | 1.408097 | 3.686643  | -0.273471 |
| H  | 0.835599 | 4.015920  | 0.614572  |
| C  | 2.302778 | -2.918171 | -0.669131 |
| H  | 2.663623 | -2.766558 | -1.708014 |
| H  | 2.504599 | -3.977012 | -0.413498 |
| H  | 1.205027 | -2.764713 | -0.651616 |
| C  | 4.562135 | -2.141856 | 0.257656  |
| H  | 5.076086 | -1.514642 | 1.014112  |
| H  | 4.847263 | -3.198155 | 0.436748  |
| H  | 4.938226 | -1.853865 | -0.746559 |
| H  | 0.769923 | 3.787026  | -1.172836 |
| H  | 2.277201 | 4.370347  | -0.395718 |

|    |           |           |           |
|----|-----------|-----------|-----------|
| Sb | -2.242244 | -0.311764 | 0.016055  |
| F  | -1.150805 | 1.341593  | -0.537875 |
| F  | -0.527336 | -1.038782 | -0.864826 |
| F  | -2.679851 | -2.035406 | 0.656505  |
| F  | -3.416605 | 0.742476  | 1.055270  |
| F  | -0.751681 | -0.120705 | 1.436448  |
| F  | -3.164516 | -0.321415 | -1.632618 |

82

I-6+CN+PIVH+ SCF Done: -1899.48974070 A.U.

|    |           |           |           |
|----|-----------|-----------|-----------|
| Ru | -1.241501 | -0.815393 | 0.655107  |
| C  | -1.039850 | -2.200937 | 2.404005  |
| C  | -2.416549 | -1.811697 | 2.264783  |
| C  | -2.757358 | -0.430050 | 2.208645  |
| C  | -1.774747 | 0.617625  | 2.301685  |
| C  | -0.399336 | 0.210601  | 2.390925  |
| C  | -0.039343 | -1.170936 | 2.466508  |
| H  | -3.196823 | -2.577117 | 2.139632  |
| H  | -3.800740 | -0.160252 | 1.986516  |
| H  | 0.405697  | 0.959273  | 2.345447  |
| H  | 1.028246  | -1.429271 | 2.475213  |
| C  | -2.155716 | 2.083810  | 2.367589  |
| H  | -1.287130 | 2.652411  | 1.974974  |
| C  | -0.656979 | -3.649361 | 2.491719  |
| H  | 0.366822  | -3.826124 | 2.112773  |
| C  | 1.684868  | -2.163268 | -0.425901 |
| C  | -0.628387 | -3.808135 | -0.890063 |
| C  | -0.720487 | -2.396953 | -1.042461 |
| H  | -1.550583 | -2.018571 | -1.652570 |
| C  | 0.420604  | -1.534449 | -0.801340 |
| C  | -3.390229 | 2.447779  | 1.530988  |
| H  | -4.322802 | 2.017467  | 1.952910  |
| H  | -3.527425 | 3.547345  | 1.511912  |
| H  | -3.295990 | 2.088236  | 0.487811  |
| C  | -2.340185 | 2.466502  | 3.854892  |
| H  | -1.428240 | 2.253107  | 4.448932  |
| H  | -2.562272 | 3.549470  | 3.945404  |
| H  | -3.184621 | 1.905630  | 4.308691  |
| H  | -1.360419 | -4.297874 | 1.936087  |
| H  | -0.680481 | -3.951855 | 3.561337  |
| H  | -1.507556 | -4.429542 | -1.117691 |
| C  | 1.718281  | -3.557598 | -0.325084 |
| C  | 0.583502  | -4.382267 | -0.533209 |
| H  | 0.681734  | -5.473409 | -0.429643 |
| H  | 2.678260  | -4.025449 | -0.057106 |
| C  | 6.271184  | -0.319305 | -1.360924 |
| C  | 5.005542  | -0.616221 | -0.839890 |
| C  | 4.461625  | 0.165451  | 0.194579  |
| C  | 5.145586  | 1.262712  | 0.739822  |
| C  | 6.412238  | 1.566226  | 0.215012  |
| C  | 6.965990  | 0.781457  | -0.821997 |

|   |           |           |           |
|---|-----------|-----------|-----------|
| C | 4.018283  | -1.690088 | -1.218927 |
| N | 2.905040  | -1.464476 | -0.275327 |
| C | 3.118129  | -0.347549 | 0.538538  |
| H | 6.713348  | -0.918891 | -2.171792 |
| H | 4.688459  | 1.853951  | 1.547993  |
| H | 6.983468  | 2.419301  | 0.612603  |
| H | 7.961212  | 1.037039  | -1.218199 |
| H | 4.441667  | -2.713667 | -1.118618 |
| O | 2.311600  | 0.099300  | 1.358030  |
| H | 3.646979  | -1.557223 | -2.258400 |
| N | 0.121965  | -0.172497 | -0.884856 |
| C | 1.101750  | 0.809958  | -1.181095 |
| O | 2.060718  | 0.522964  | -1.895656 |
| C | 0.853209  | 2.203290  | -0.713292 |
| C | -0.435434 | 2.725840  | -0.480125 |
| C | 1.980659  | 3.047440  | -0.589516 |
| C | -0.596710 | 4.079159  | -0.140265 |
| C | 1.819333  | 4.386888  | -0.211803 |
| C | 0.529190  | 4.908603  | 0.005790  |
| H | -1.319008 | 2.081943  | -0.581026 |
| H | 2.978169  | 2.627523  | -0.789512 |
| H | -1.608010 | 4.486901  | 0.012639  |
| H | 2.702142  | 5.035081  | -0.099214 |
| H | 0.401431  | 5.966910  | 0.282145  |
| O | -2.862263 | -0.295543 | -0.664736 |
| C | -2.897546 | 0.129468  | -1.854221 |
| O | -1.819978 | 0.373139  | -2.548310 |
| C | -4.246688 | 0.321565  | -2.544623 |
| C | -4.079275 | 1.060471  | -3.885637 |
| C | -5.183762 | 1.108310  | -1.599569 |
| H | -5.287363 | 0.602078  | -0.619791 |
| H | -4.806601 | 2.137036  | -1.425583 |
| H | -6.188975 | 1.190364  | -2.059595 |
| H | -3.640640 | 2.068176  | -3.741255 |
| H | -5.071493 | 1.181280  | -4.364864 |
| H | -3.423739 | 0.501434  | -4.581416 |
| C | -4.807701 | -1.108077 | -2.779053 |
| H | -4.133642 | -1.703364 | -3.429756 |
| H | -4.945894 | -1.646728 | -1.819881 |
| H | -5.791587 | -1.038133 | -3.285766 |
| H | -0.981372 | 0.165189  | -1.938298 |

58

I-6SbF6 SCF Done: -1757.55866749 A.U.

|    |          |           |           |
|----|----------|-----------|-----------|
| Ru | 1.202666 | -1.002476 | -0.570723 |
| C  | 3.110899 | -2.053861 | -0.533949 |
| C  | 3.312254 | -0.684651 | -0.121121 |
| C  | 2.815837 | 0.384816  | -0.933384 |
| C  | 2.312066 | 0.167300  | -2.281553 |
| C  | 2.124154 | -1.171826 | -2.678515 |
| C  | 2.424208 | -2.266092 | -1.780968 |

|    |           |           |           |
|----|-----------|-----------|-----------|
| H  | 3.746538  | -0.453551 | 0.862584  |
| H  | 2.826571  | 1.406308  | -0.524716 |
| H  | 1.610308  | -1.386459 | -3.629315 |
| H  | 2.155947  | -3.293244 | -2.075948 |
| C  | 1.860526  | 1.311689  | -3.188408 |
| H  | 2.051391  | 0.951504  | -4.225237 |
| C  | 3.581083  | -3.232094 | 0.277747  |
| H  | 2.831986  | -4.048381 | 0.257564  |
| C  | -0.803498 | -1.848945 | 1.585693  |
| C  | 1.054235  | -2.180609 | 3.664828  |
| C  | 1.464310  | -1.786757 | 2.382713  |
| H  | 2.524797  | -1.539933 | 2.248108  |
| C  | 0.578088  | -1.631201 | 1.290237  |
| C  | 0.345696  | 1.588337  | -3.058460 |
| H  | 0.114261  | 2.022509  | -2.069292 |
| H  | 0.021094  | 2.307862  | -3.838389 |
| H  | -0.247799 | 0.657382  | -3.165200 |
| C  | 2.677878  | 2.597729  | -2.972916 |
| H  | 3.770594  | 2.404906  | -3.007229 |
| H  | 2.436924  | 3.335342  | -3.765729 |
| H  | 2.425879  | 3.065472  | -2.000155 |
| H  | 3.766978  | -2.965077 | 1.334145  |
| H  | 4.530587  | -3.619529 | -0.149901 |
| H  | 1.794022  | -2.260073 | 4.477112  |
| C  | -1.223458 | -2.272851 | 2.868848  |
| C  | -0.301923 | -2.447187 | 3.906140  |
| H  | -0.649391 | -2.765808 | 4.901000  |
| H  | -2.288190 | -2.464570 | 3.064235  |
| C  | -5.194669 | -0.569085 | -0.584682 |
| C  | -3.886314 | -0.970483 | -0.290842 |
| C  | -2.971227 | -1.225671 | -1.330647 |
| C  | -3.317553 | -1.084051 | -2.683198 |
| C  | -4.631773 | -0.686312 | -2.977413 |
| C  | -5.556642 | -0.432368 | -1.939717 |
| C  | -3.190957 | -1.182418 | 1.026100  |
| N  | -1.830599 | -1.595881 | 0.631125  |
| C  | -1.678456 | -1.559137 | -0.721305 |
| H  | -5.920396 | -0.356042 | 0.215546  |
| H  | -2.573378 | -1.274984 | -3.470781 |
| H  | -4.945865 | -0.562322 | -4.025393 |
| H  | -6.579231 | -0.113000 | -2.195352 |
| H  | -3.692340 | -1.964937 | 1.634531  |
| O  | -0.599094 | -1.730530 | -1.359022 |
| H  | -3.108515 | -0.255123 | 1.635235  |
| Sb | -0.110380 | 2.149792  | 1.141266  |
| F  | -0.184542 | 0.623742  | -0.184324 |
| F  | -1.367611 | 1.112723  | 2.182108  |
| F  | -0.100177 | 3.611030  | 2.367320  |
| F  | 1.170980  | 2.969778  | -0.065183 |
| F  | 1.391718  | 1.279247  | 1.990030  |



F -1.545071 2.855825 0.079244  
39

I-cat+2SbF6 SCF Done: -1692.61274640 A.U.

Ru -0.275264 -0.897414 0.382491  
C -0.004661 -1.568296 2.424567  
C 1.141632 -1.938019 1.645814  
C 0.998581 -2.633573 0.392603  
C -0.290623 -2.990512 -0.119771  
C -1.442947 -2.665601 0.701884  
C -1.308723 -1.973565 1.941271  
H 2.129831 -1.531839 1.903726  
H 1.894329 -2.713153 -0.240611  
H -2.453641 -2.789253 0.280852  
H -2.215766 -1.587184 2.430437  
C -0.486539 -3.551675 -1.518116  
H -1.495641 -3.213631 -1.842832  
C 0.128312 -0.652391 3.607399  
H -0.778389 -0.027485 3.722191  
C 0.538444 -3.014869 -2.532175  
H 1.556184 -3.416659 -2.345368  
H 0.249957 -3.322164 -3.556997  
H 0.595480 -1.907127 -2.506764  
C -0.488769 -5.094338 -1.443805  
H -1.259473 -5.473452 -0.741164  
H -0.695847 -5.524639 -2.444763  
H 0.499432 -5.472252 -1.106473  
H 1.002934 0.012969 3.478187  
H 0.260663 -1.255649 4.531539  
Sb -2.617742 1.309440 -0.275311  
F -1.033238 1.019409 0.984156  
F -1.519422 2.464301 -1.313975  
F -4.001947 1.212472 -1.573194  
F -3.446108 -0.077971 0.790493  
F -1.638633 -0.264428 -1.151459  
F -3.305325 2.682124 0.842020  
Sb 2.807000 1.036343 -0.208443  
F 3.305468 -0.836029 -0.050042  
F 3.213311 0.973599 -2.071632  
F 1.988206 2.753109 -0.336623  
F 2.120304 0.866736 1.603747  
F 0.968310 0.277699 -0.787323  
F 4.511420 1.658958 0.361816

25

I-cat+2 SCF Done: -483.555018422 A.U.

Ru 0.689968 -0.938978 -0.286446  
C 1.825901 0.880396 0.328643  
C 0.983076 0.382945 1.395182  
C -0.423793 0.155988 1.207861  
C -1.080874 0.417400 -0.054498  
C -0.219028 0.825869 -1.143732

|   |           |           |           |
|---|-----------|-----------|-----------|
| C | 1.188345  | 1.051081  | -0.959887 |
| H | 1.448797  | 0.083214  | 2.351917  |
| H | -0.995874 | -0.319917 | 2.023617  |
| H | -0.637375 | 0.882658  | -2.165581 |
| H | 1.813997  | 1.272975  | -1.843900 |
| C | -2.541763 | 0.169167  | -0.277073 |
| H | -2.685778 | -0.091178 | -1.349504 |
| C | 3.290399  | 1.070270  | 0.510276  |
| H | 3.865402  | 0.939285  | -0.427659 |
| C | -3.179067 | -0.908352 | 0.611479  |
| H | -3.203831 | -0.615090 | 1.681521  |
| H | -4.231577 | -1.059609 | 0.301035  |
| H | -2.669166 | -1.890494 | 0.515951  |
| C | -3.189975 | 1.585331  | -0.054750 |
| H | -2.785843 | 2.359085  | -0.737809 |
| H | -4.275223 | 1.473213  | -0.266850 |
| H | -3.069676 | 1.923139  | 0.994380  |
| H | 3.713113  | 0.441834  | 1.318984  |
| H | 3.435102  | 2.135332  | 0.826511  |

33

I-catClSbF6 SCF Done: -1548.59804707 A.U.

|    |           |           |           |
|----|-----------|-----------|-----------|
| Ru | -1.094275 | -0.522735 | -0.126514 |
| C  | -2.904227 | -1.127283 | 0.856652  |
| C  | -3.214925 | -0.497682 | -0.405750 |
| C  | -2.677482 | 0.784034  | -0.745636 |
| C  | -1.849413 | 1.524846  | 0.188000  |
| C  | -1.600324 | 0.941160  | 1.470725  |
| C  | -2.081628 | -0.373070 | 1.775807  |
| H  | -3.733335 | -1.083334 | -1.181206 |
| H  | -2.815884 | 1.158476  | -1.770271 |
| H  | -0.870895 | 1.418312  | 2.142082  |
| H  | -1.716520 | -0.872098 | 2.688354  |
| C  | -1.178425 | 2.839467  | -0.178082 |
| H  | -0.171794 | 2.798227  | 0.291447  |
| C  | -3.336533 | -2.537985 | 1.151408  |
| H  | -2.646291 | -3.020822 | 1.870415  |
| C  | -0.991092 | 3.046488  | -1.688764 |
| H  | -1.959470 | 3.208774  | -2.208965 |
| H  | -0.373024 | 3.949208  | -1.867482 |
| H  | -0.472103 | 2.184053  | -2.151273 |
| C  | -1.974834 | 3.997938  | 0.463944  |
| H  | -2.058863 | 3.881134  | 1.564035  |
| H  | -1.471281 | 4.965135  | 0.260016  |
| H  | -3.002507 | 4.053193  | 0.045570  |
| H  | -3.341989 | -3.143126 | 0.223868  |
| H  | -4.358303 | -2.544626 | 1.588248  |
| Sb | 2.199407  | -0.056472 | 0.132965  |
| F  | 0.731452  | -1.236126 | 0.881048  |
| F  | 2.721601  | -1.489281 | -1.009572 |
| F  | 3.297255  | 1.220366  | -0.755762 |

|    |           |           |           |
|----|-----------|-----------|-----------|
| F  | 1.430500  | 1.333617  | 1.247018  |
| F  | 0.668365  | 0.356832  | -1.128901 |
| F  | 3.387490  | -0.565957 | 1.530040  |
| Cl | -0.841533 | -2.307920 | -1.583184 |

52

I-cat+SUBST0+2 SCF Done: -1153.40101865 A.U.

|    |           |           |           |
|----|-----------|-----------|-----------|
| Ru | 1.392151  | -0.264201 | -0.511670 |
| C  | 2.901251  | -1.601973 | -1.407815 |
| C  | 2.087329  | -2.349200 | -0.481453 |
| C  | 1.878037  | -1.879016 | 0.848483  |
| C  | 2.508072  | -0.665931 | 1.330104  |
| C  | 3.381626  | 0.033731  | 0.424891  |
| C  | 3.560587  | -0.411682 | -0.913407 |
| H  | 1.521371  | -3.222986 | -0.842693 |
| H  | 1.150916  | -2.402141 | 1.489395  |
| H  | 3.824976  | 0.991127  | 0.741492  |
| H  | 4.142955  | 0.206305  | -1.616101 |
| C  | 2.207644  | -0.128475 | 2.716699  |
| H  | 2.729657  | 0.848575  | 2.803800  |
| C  | 3.047362  | -2.029821 | -2.836658 |
| H  | 3.234026  | -1.172506 | -3.512248 |
| C  | -3.580660 | -0.350420 | -0.096120 |
| C  | -5.634370 | -2.253364 | 0.154840  |
| C  | -4.494146 | -2.541967 | -0.621008 |
| H  | -4.411633 | -3.508819 | -1.140270 |
| C  | -3.466169 | -1.601274 | -0.753840 |
| C  | 0.700482  | 0.114218  | 2.944557  |
| H  | 0.108629  | -0.822086 | 2.875182  |
| H  | 0.538519  | 0.529637  | 3.959042  |
| H  | 0.293244  | 0.845462  | 2.212885  |
| C  | 2.809814  | -1.096893 | 3.763163  |
| H  | 3.893215  | -1.263096 | 3.598491  |
| H  | 2.682693  | -0.665792 | 4.777009  |
| H  | 2.298239  | -2.081875 | 3.750127  |
| H  | 2.166961  | -2.597765 | -3.194048 |
| H  | 3.931612  | -2.704139 | -2.907460 |
| H  | -6.439388 | -2.997794 | 0.250774  |
| C  | -4.729660 | -0.051968 | 0.677367  |
| C  | -5.747275 | -1.006668 | 0.798936  |
| H  | -6.638031 | -0.773464 | 1.401556  |
| H  | -4.843094 | 0.913014  | 1.190838  |
| C  | -0.913914 | 4.002123  | 0.003203  |
| C  | -1.425967 | 2.708489  | -0.167305 |
| C  | -0.585384 | 1.709695  | -0.673049 |
| C  | 0.769933  | 1.916185  | -1.023237 |
| C  | 1.284634  | 3.224532  | -0.838587 |
| C  | 0.448389  | 4.234244  | -0.320386 |
| C  | -2.772020 | 2.073215  | 0.089446  |
| N  | -2.556425 | 0.627768  | -0.238421 |
| C  | -1.270284 | 0.435308  | -0.617043 |

|   |           |           |           |
|---|-----------|-----------|-----------|
| H | -1.538544 | 4.828792  | 0.376103  |
| H | -2.591766 | -1.827912 | -1.377515 |
| H | 2.317060  | 3.466678  | -1.133068 |
| H | 0.859800  | 5.246869  | -0.186686 |
| H | -3.577230 | 2.489494  | -0.553262 |
| O | -0.627057 | -0.675889 | -0.769607 |
| H | -3.092200 | 2.169147  | 1.148217  |
| H | 1.302943  | 1.244334  | -1.782964 |

82

I-cat+SUBST0+PIV+SUBST-CO2del6+ SCF Done: -1899.42536389 A.U.

|    |           |           |           |
|----|-----------|-----------|-----------|
| Ru | 0.303879  | -1.227778 | -0.723891 |
| C  | 1.487873  | -3.048888 | -1.601805 |
| C  | 0.312060  | -2.850885 | -2.385673 |
| C  | -0.965001 | -2.795807 | -1.749808 |
| C  | -1.157683 | -3.223268 | -0.373336 |
| C  | 0.000218  | -3.311744 | 0.415331  |
| C  | 1.309171  | -3.096082 | -0.171925 |
| H  | 0.395198  | -2.658498 | -3.466049 |
| H  | -1.842593 | -2.538003 | -2.360103 |
| H  | -0.071052 | -3.519974 | 1.494113  |
| H  | 2.191282  | -3.135366 | 0.485103  |
| C  | -2.531835 | -3.524478 | 0.194596  |
| H  | -2.470879 | -3.370378 | 1.294038  |
| C  | 2.846716  | -3.023940 | -2.236367 |
| H  | 3.657614  | -3.033254 | -1.484610 |
| C  | -2.492286 | 2.417004  | -1.526025 |
| C  | -2.298232 | 3.631547  | -4.041078 |
| C  | -1.148262 | 3.114936  | -3.416037 |
| H  | -0.161288 | 3.187424  | -3.897915 |
| C  | -1.235668 | 2.510470  | -2.153742 |
| C  | -3.662793 | -2.638812 | -0.352718 |
| H  | -3.855408 | -2.831109 | -1.428668 |
| H  | -4.603258 | -2.862699 | 0.188594  |
| H  | -3.440283 | -1.562909 | -0.227836 |
| C  | -2.820525 | -5.026293 | -0.059170 |
| H  | -2.042334 | -5.677768 | 0.387610  |
| H  | -3.798934 | -5.301432 | 0.384606  |
| H  | -2.868019 | -5.241614 | -1.147365 |
| H  | 2.955413  | -2.116055 | -2.864790 |
| H  | 2.961854  | -3.910495 | -2.894699 |
| H  | -2.222851 | 4.110389  | -5.029735 |
| C  | -3.652650 | 2.931293  | -2.139502 |
| C  | -3.547443 | 3.542966  | -3.399230 |
| H  | -4.449880 | 3.946147  | -3.884073 |
| H  | -4.633595 | 2.842282  | -1.647697 |
| C  | -3.504181 | 1.475532  | 3.346240  |
| C  | -3.045613 | 1.463020  | 2.023924  |
| C  | -2.254666 | 0.395610  | 1.546488  |
| C  | -1.890965 | -0.676307 | 2.378542  |
| C  | -2.353950 | -0.666692 | 3.703370  |

|   |           |           |           |
|---|-----------|-----------|-----------|
| C | -3.153258 | 0.396023  | 4.180210  |
| C | -3.254935 | 2.446343  | 0.905616  |
| N | -2.587627 | 1.802288  | -0.237212 |
| C | -1.976698 | 0.649140  | 0.125023  |
| H | -4.120731 | 2.303259  | 3.728822  |
| H | -0.335767 | 2.138115  | -1.647746 |
| H | -2.080711 | -1.486977 | 4.384413  |
| H | -3.500093 | 0.384709  | 5.224966  |
| H | -2.768369 | 3.427036  | 1.102296  |
| O | -1.413640 | -0.108500 | -0.739922 |
| H | -4.328137 | 2.635423  | 0.688412  |
| H | -1.234777 | -1.471017 | 2.005711  |
| O | 0.909579  | -0.357956 | 1.033341  |
| C | 0.843493  | 0.933000  | 1.324488  |
| O | 0.367732  | 1.800712  | 0.589790  |
| C | 1.415611  | 1.296096  | 2.723469  |
| C | 0.301217  | 2.053177  | 3.482600  |
| C | 2.609238  | 2.252783  | 2.489526  |
| H | 3.453448  | 1.737904  | 1.992812  |
| H | 2.305131  | 3.112765  | 1.860856  |
| H | 2.972133  | 2.638463  | 3.464982  |
| H | -0.047695 | 2.923429  | 2.892569  |
| H | 0.691467  | 2.419245  | 4.454758  |
| H | -0.567662 | 1.398980  | 3.690413  |
| C | 1.865635  | 0.058145  | 3.516692  |
| H | 1.021158  | -0.641235 | 3.684986  |
| H | 2.666163  | -0.490588 | 2.981137  |
| H | 2.260917  | 0.366323  | 4.506875  |
| N | 1.563541  | -0.246503 | -1.621619 |
| C | 2.294980  | 0.906032  | -1.435239 |
| O | 1.881319  | 1.872414  | -2.101118 |
| C | 3.565883  | 0.889662  | -0.665015 |
| C | 3.943390  | -0.206923 | 0.142106  |
| C | 4.400449  | 2.026261  | -0.744944 |
| C | 5.145129  | -0.165955 | 0.863351  |
| C | 5.598414  | 2.065905  | -0.017863 |
| C | 5.973299  | 0.970115  | 0.783694  |
| H | 3.272962  | -1.071493 | 0.230509  |
| H | 4.084960  | 2.870557  | -1.376789 |
| H | 5.435287  | -1.015336 | 1.500928  |
| H | 6.245576  | 2.954725  | -0.073554 |
| H | 6.914956  | 1.003457  | 1.353675  |

82

I-cat+SUBST0+PIV+SUBST-CO2+ SCF Done: -1899.42257747 A.U.

|    |           |           |           |
|----|-----------|-----------|-----------|
| Ru | -0.041810 | -1.318527 | -0.734193 |
| C  | 0.330926  | -3.618363 | -0.948079 |
| C  | -0.420638 | -3.153792 | -2.070762 |
| C  | -1.640418 | -2.436720 | -1.874330 |
| C  | -2.292386 | -2.377633 | -0.578062 |
| C  | -1.498151 | -2.708810 | 0.533107  |

|   |           |           |           |
|---|-----------|-----------|-----------|
| C | -0.147253 | -3.215965 | 0.347679  |
| H | -0.022470 | -3.284580 | -3.088702 |
| H | -2.151578 | -2.023487 | -2.755175 |
| H | -1.879312 | -2.553638 | 1.552983  |
| H | 0.462670  | -3.424944 | 1.240071  |
| C | -3.717224 | -1.888869 | -0.417696 |
| H | -3.757981 | -1.339542 | 0.544346  |
| C | 1.646326  | -4.313607 | -1.142045 |
| H | 2.162953  | -4.502468 | -0.182698 |
| C | -2.826745 | 1.370315  | 0.993561  |
| C | -4.572794 | 0.053938  | 2.765216  |
| C | -5.078455 | 0.982037  | 1.836262  |
| H | -6.157254 | 1.198309  | 1.800817  |
| C | -4.209662 | 1.643097  | 0.952719  |
| C | -4.197172 | -0.944152 | -1.530266 |
| H | -4.332217 | -1.472844 | -2.497609 |
| H | -5.181936 | -0.519901 | -1.251388 |
| H | -3.491151 | -0.104338 | -1.679414 |
| C | -4.637532 | -3.129092 | -0.288667 |
| H | -4.338826 | -3.778530 | 0.559241  |
| H | -5.683065 | -2.800489 | -0.119170 |
| H | -4.618033 | -3.740155 | -1.215419 |
| H | 2.306819  | -3.701140 | -1.790577 |
| H | 1.479041  | -5.285972 | -1.650729 |
| H | -5.253766 | -0.450708 | 3.467531  |
| C | -2.317910 | 0.424290  | 1.904409  |
| C | -3.194254 | -0.223694 | 2.791556  |
| H | -2.789658 | -0.945799 | 3.518555  |
| H | -1.245260 | 0.193062  | 1.907816  |
| C | -0.377582 | 5.134994  | -1.343530 |
| C | -0.882741 | 3.906345  | -0.904452 |
| C | -0.469064 | 2.705511  | -1.518511 |
| C | 0.457589  | 2.679159  | -2.572457 |
| C | 0.959253  | 3.912013  | -3.013159 |
| C | 0.544750  | 5.121384  | -2.408870 |
| C | -1.847291 | 3.577703  | 0.203904  |
| N | -1.947907 | 2.105574  | 0.133901  |
| C | -1.141898 | 1.598914  | -0.840597 |
| H | -0.683544 | 6.083512  | -0.875928 |
| H | -4.604903 | 2.365781  | 0.222677  |
| H | 1.696172  | 3.939062  | -3.830052 |
| H | 0.957639  | 6.074811  | -2.773944 |
| H | -2.847067 | 4.044915  | 0.069637  |
| O | -1.125622 | 0.367661  | -1.176285 |
| H | -1.468756 | 3.868727  | 1.208406  |
| H | 0.808131  | 1.725026  | -2.990262 |
| O | 0.618373  | -0.448482 | 1.019021  |
| C | 1.168522  | 0.750630  | 1.135633  |
| O | 1.366971  | 1.528960  | 0.204292  |
| C | 1.529088  | 1.151773  | 2.593795  |

|   |           |           |           |
|---|-----------|-----------|-----------|
| C | 0.633999  | 2.367261  | 2.943133  |
| C | 3.009889  | 1.595893  | 2.589102  |
| H | 3.682647  | 0.749028  | 2.352798  |
| H | 3.176912  | 2.389684  | 1.835443  |
| H | 3.287688  | 1.987257  | 3.589738  |
| H | 0.777964  | 3.173941  | 2.195950  |
| H | 0.907262  | 2.762721  | 3.943316  |
| H | -0.441635 | 2.095197  | 2.972850  |
| C | 1.317290  | 0.007053  | 3.598328  |
| H | 0.258497  | -0.321334 | 3.635154  |
| H | 1.938149  | -0.872167 | 3.332217  |
| H | 1.606403  | 0.338514  | 4.617175  |
| N | 1.629705  | -1.146269 | -1.476112 |
| C | 2.708038  | -0.298229 | -1.351071 |
| O | 2.774031  | 0.532826  | -2.275582 |
| C | 3.755642  | -0.534540 | -0.325967 |
| C | 3.605553  | -1.523889 | 0.671773  |
| C | 4.924392  | 0.255633  | -0.366950 |
| C | 4.622167  | -1.725472 | 1.616672  |
| C | 5.935009  | 0.056490  | 0.584275  |
| C | 5.787639  | -0.936261 | 1.572571  |
| H | 2.682189  | -2.118517 | 0.714191  |
| H | 5.017105  | 1.022581  | -1.151009 |
| H | 4.506612  | -2.494056 | 2.396466  |
| H | 6.844669  | 0.675958  | 0.557553  |
| H | 6.584536  | -1.093222 | 2.316205  |

85

I-cat+SUBST0+PIV+SUBSTdel6+ SCF Done: -2087.89318673 A.U.

|    |           |           |           |
|----|-----------|-----------|-----------|
| Ru | -0.251454 | -1.197167 | -0.986883 |
| C  | 0.746643  | -2.765809 | -2.206935 |
| C  | 0.003940  | -1.875993 | -3.075679 |
| C  | -1.368619 | -1.610339 | -2.844685 |
| C  | -2.092057 | -2.261530 | -1.768200 |
| C  | -1.354339 | -3.118223 | -0.903125 |
| C  | 0.051983  | -3.360461 | -1.106368 |
| H  | 0.534356  | -1.326950 | -3.868964 |
| H  | -1.874708 | -0.852740 | -3.459967 |
| H  | -1.850481 | -3.554662 | -0.021703 |
| H  | 0.601391  | -3.986369 | -0.386466 |
| C  | -3.594267 | -2.095191 | -1.605275 |
| H  | -3.834839 | -2.319585 | -0.543583 |
| C  | 2.210863  | -3.007910 | -2.455755 |
| H  | 2.714214  | -3.468255 | -1.585477 |
| C  | -0.642975 | 3.455723  | -0.423294 |
| C  | 1.106066  | 5.141488  | -1.812083 |
| C  | 1.467772  | 4.643530  | -0.547040 |
| H  | 2.440794  | 4.911373  | -0.106986 |
| C  | 0.600012  | 3.788652  | 0.150991  |
| C  | -4.120423 | -0.688908 | -1.930581 |
| H  | -4.033982 | -0.457567 | -3.012814 |

|   |           |           |           |
|---|-----------|-----------|-----------|
| H | -5.195512 | -0.621515 | -1.670896 |
| H | -3.575649 | 0.090774  | -1.366737 |
| C | -4.279035 | -3.172922 | -2.480016 |
| H | -3.950014 | -4.196174 | -2.206761 |
| H | -5.379981 | -3.119132 | -2.357152 |
| H | -4.049386 | -3.014144 | -3.554785 |
| H | 2.736626  | -2.065493 | -2.709022 |
| H | 2.323737  | -3.693695 | -3.322484 |
| H | 1.796800  | 5.798818  | -2.361054 |
| C | -1.007840 | 3.937673  | -1.691755 |
| C | -0.123564 | 4.779428  | -2.387803 |
| H | -0.399456 | 5.157473  | -3.384083 |
| H | -1.980718 | 3.653845  | -2.120560 |
| C | -3.806692 | 1.727677  | 3.123118  |
| C | -2.932495 | 1.892521  | 2.041840  |
| C | -2.552977 | 0.789802  | 1.247255  |
| C | -3.006316 | -0.507172 | 1.535621  |
| C | -3.883922 | -0.675093 | 2.617832  |
| C | -4.285708 | 0.432379  | 3.397513  |
| C | -2.251665 | 3.127035  | 1.515991  |
| N | -1.551751 | 2.634293  | 0.323560  |
| C | -1.682275 | 1.291260  | 0.163508  |
| H | -4.110550 | 2.582580  | 3.746505  |
| H | 0.873418  | 3.353829  | 1.123409  |
| H | -4.254857 | -1.679935 | 2.871420  |
| H | -4.973896 | 0.277483  | 4.242818  |
| H | -1.514223 | 3.537674  | 2.242083  |
| O | -1.188079 | 0.684939  | -0.831988 |
| H | -2.955281 | 3.945863  | 1.249460  |
| H | -2.650690 | -1.360567 | 0.946997  |
| O | -0.014534 | -1.209564 | 1.074709  |
| C | 0.391248  | -0.217034 | 1.843702  |
| O | 0.648891  | 0.930320  | 1.455506  |
| C | 0.522450  | -0.576418 | 3.350391  |
| C | -0.527372 | 0.270404  | 4.108279  |
| C | 1.935897  | -0.147023 | 3.807442  |
| H | 2.725541  | -0.731281 | 3.297067  |
| H | 2.105147  | 0.925770  | 3.590270  |
| H | 2.044622  | -0.309038 | 4.899950  |
| H | -0.405627 | 1.346014  | 3.869618  |
| H | -0.400652 | 0.138179  | 5.202938  |
| H | -1.559496 | -0.031920 | 3.846670  |
| C | 0.294542  | -2.072825 | 3.618795  |
| H | -0.717072 | -2.388721 | 3.293881  |
| H | 1.035405  | -2.694234 | 3.076031  |
| H | 0.394742  | -2.285753 | 4.703468  |
| N | 1.449625  | 0.012571  | -1.146440 |
| C | 2.625324  | 0.212832  | -0.589897 |
| O | 3.237825  | 1.307174  | -1.116634 |
| C | 2.416418  | 1.817781  | -2.122560 |



|   |          |           |           |
|---|----------|-----------|-----------|
| O | 1.295842 | 1.019612  | -2.132446 |
| O | 2.657492 | 2.730145  | -2.847449 |
| C | 3.355924 | -0.575958 | 0.395007  |
| C | 2.943992 | -1.877637 | 0.769951  |
| C | 4.550156 | -0.036333 | 0.936775  |
| C | 3.724650 | -2.630030 | 1.655261  |
| C | 5.316675 | -0.793923 | 1.832151  |
| C | 4.912706 | -2.093932 | 2.187039  |
| H | 2.000537 | -2.279866 | 0.387255  |
| H | 4.872212 | 0.975413  | 0.651973  |
| H | 3.398265 | -3.640902 | 1.943164  |
| H | 6.239243 | -0.366963 | 2.253586  |
| H | 5.521055 | -2.688456 | 2.885894  |

85

I-cat+SUBST0+PIV+SUBST+ SCF Done: -2087.89702093 A.U.

|    |           |           |           |
|----|-----------|-----------|-----------|
| Ru | 0.842598  | -1.337263 | -0.384601 |
| C  | 0.938705  | -3.013689 | -1.829403 |
| C  | 0.997735  | -3.526266 | -0.477083 |
| C  | 1.959944  | -3.063105 | 0.459024  |
| C  | 2.941450  | -2.077402 | 0.069522  |
| C  | 2.880722  | -1.547472 | -1.253478 |
| C  | 1.874567  | -1.992509 | -2.183297 |
| H  | 0.220731  | -4.229516 | -0.137727 |
| H  | 1.923525  | -3.430433 | 1.494409  |
| H  | 3.554816  | -0.737619 | -1.563450 |
| H  | 1.805666  | -1.490515 | -3.158999 |
| C  | 4.040999  | -1.650108 | 1.027665  |
| H  | 4.471651  | -0.706141 | 0.630011  |
| C  | -0.093773 | -3.527484 | -2.797452 |
| H  | -0.206868 | -2.857130 | -3.671001 |
| C  | -1.612971 | 1.241651  | 2.508089  |
| C  | -4.114130 | 0.284807  | 3.353159  |
| C  | -4.040814 | 1.335482  | 2.421729  |
| H  | -4.963158 | 1.789666  | 2.026968  |
| C  | -2.792710 | 1.814623  | 1.990615  |
| C  | 3.569038  | -1.395349 | 2.467790  |
| H  | 3.223528  | -2.328549 | 2.959608  |
| H  | 4.409107  | -1.001827 | 3.074223  |
| H  | 2.737579  | -0.666169 | 2.496473  |
| C  | 5.149826  | -2.728282 | 0.969136  |
| H  | 5.524739  | -2.878258 | -0.063688 |
| H  | 6.005399  | -2.426232 | 1.607024  |
| H  | 4.774390  | -3.703653 | 1.344165  |
| H  | -1.082381 | -3.654672 | -2.312488 |
| H  | 0.221195  | -4.523048 | -3.177569 |
| H  | -5.092706 | -0.090962 | 3.687854  |
| C  | -1.678746 | 0.178134  | 3.430612  |
| C  | -2.932911 | -0.292941 | 3.852499  |
| H  | -2.987640 | -1.124390 | 4.570217  |
| H  | -0.748911 | -0.261667 | 3.818289  |

|   |           |           |           |
|---|-----------|-----------|-----------|
| C | 2.261193  | 4.365728  | 1.622374  |
| C | 1.383754  | 3.279365  | 1.720598  |
| C | 1.748262  | 2.010844  | 1.218387  |
| C | 2.974929  | 1.807077  | 0.568387  |
| C | 3.852690  | 2.895962  | 0.461520  |
| C | 3.504861  | 4.156729  | 0.994486  |
| C | -0.000428 | 3.193622  | 2.304734  |
| N | -0.348151 | 1.776230  | 2.115786  |
| C | 0.666034  | 1.062475  | 1.537254  |
| H | 1.989734  | 5.357272  | 2.015865  |
| H | -2.730046 | 2.622962  | 1.246541  |
| H | 4.817365  | 2.771349  | -0.053064 |
| H | 4.210746  | 4.996350  | 0.901074  |
| H | -0.722083 | 3.849686  | 1.770239  |
| O | 0.628677  | -0.195764 | 1.419026  |
| H | -0.042237 | 3.456937  | 3.384716  |
| H | 3.213858  | 0.831922  | 0.130553  |
| O | 0.217933  | 0.481811  | -1.129796 |
| C | 0.914216  | 1.226766  | -1.973105 |
| O | 1.989117  | 0.905908  | -2.486731 |
| C | 0.260831  | 2.601229  | -2.305730 |
| C | -0.053592 | 2.589663  | -3.819876 |
| C | 1.307101  | 3.700954  | -2.021009 |
| H | 1.512675  | 3.790419  | -0.937595 |
| H | 2.260530  | 3.477009  | -2.537721 |
| H | 0.930909  | 4.682270  | -2.377972 |
| H | 0.868316  | 2.405014  | -4.406082 |
| H | -0.479206 | 3.567469  | -4.128135 |
| H | -0.793223 | 1.804563  | -4.070156 |
| C | -1.015858 | 2.861588  | -1.487982 |
| H | -1.805642 | 2.119083  | -1.708545 |
| H | -0.803341 | 2.805135  | -0.401897 |
| H | -1.415048 | 3.871878  | -1.716406 |
| N | -1.195671 | -1.590919 | 0.087684  |
| C | -2.398813 | -1.141368 | -0.191750 |
| O | -3.319486 | -1.572194 | 0.714106  |
| C | -2.667510 | -2.407732 | 1.619970  |
| O | -1.343816 | -2.414127 | 1.240159  |
| O | -3.158742 | -3.015005 | 2.518490  |
| C | -2.865921 | -0.382495 | -1.341979 |
| C | -2.206368 | -0.479237 | -2.589208 |
| C | -4.054851 | 0.376457  | -1.218883 |
| C | -2.750164 | 0.163216  | -3.707486 |
| C | -4.567347 | 1.046345  | -2.337903 |
| C | -3.922611 | 0.933261  | -3.583456 |
| H | -1.281962 | -1.064005 | -2.670430 |
| H | -4.560332 | 0.437476  | -0.244322 |
| H | -2.260036 | 0.061053  | -4.687261 |
| H | -5.483813 | 1.648129  | -2.242526 |
| H | -4.338862 | 1.443267  | -4.465893 |

58

I-cat+SUBST+PIV--CO2+ SCF Done: -1418.16219937 A.U.

|    |           |           |           |
|----|-----------|-----------|-----------|
| Ru | -0.999899 | 0.504511  | -0.108215 |
| C  | -2.521952 | 2.205648  | 0.352665  |
| C  | -2.804984 | 0.951470  | 1.036364  |
| C  | -3.089834 | -0.244381 | 0.303909  |
| C  | -2.903003 | -0.322195 | -1.113185 |
| C  | -2.424099 | 0.877866  | -1.747337 |
| C  | -2.353648 | 2.139934  | -1.049850 |
| H  | -2.855213 | 0.931172  | 2.135712  |
| H  | -3.305161 | -1.156577 | 0.877323  |
| H  | -2.167995 | 0.851424  | -2.818252 |
| H  | -2.025147 | 3.036441  | -1.598554 |
| C  | -3.130415 | -1.598601 | -1.914838 |
| H  | -3.843585 | -1.301210 | -2.719123 |
| C  | -2.335947 | 3.468186  | 1.140248  |
| H  | -1.687321 | 3.284501  | 2.020685  |
| C  | -1.832517 | -2.089738 | -2.592716 |
| H  | -1.119228 | -2.439855 | -1.819315 |
| H  | -2.055463 | -2.936363 | -3.271481 |
| H  | -1.336561 | -1.300411 | -3.193793 |
| C  | -3.776364 | -2.722889 | -1.091235 |
| H  | -4.730519 | -2.406852 | -0.622052 |
| H  | -4.001717 | -3.585855 | -1.748244 |
| H  | -3.091508 | -3.083942 | -0.295380 |
| H  | -3.320098 | 3.816576  | 1.520848  |
| H  | -1.893477 | 4.276275  | 0.528066  |
| O  | 0.543608  | 1.370275  | 1.035331  |
| C  | 1.249800  | 1.610415  | -0.016359 |
| O  | 0.685387  | 1.247068  | -1.123515 |
| N  | -0.270902 | -1.137656 | 0.413922  |
| C  | 0.884847  | -1.628406 | 0.878035  |
| O  | 1.049399  | -2.104981 | 2.052306  |
| C  | -0.383356 | -1.995371 | 3.035703  |
| O  | -1.271648 | -1.627661 | 2.247126  |
| O  | -0.152653 | -2.295595 | 4.160273  |
| C  | 2.034558  | -1.686001 | -0.077955 |
| C  | 1.869464  | -1.563428 | -1.477170 |
| C  | 3.326428  | -1.876927 | 0.470222  |
| C  | 2.987449  | -1.638666 | -2.319253 |
| C  | 4.438117  | -1.940331 | -0.381864 |
| C  | 4.271754  | -1.825060 | -1.774997 |
| H  | 0.868304  | -1.421942 | -1.903805 |
| H  | 3.440221  | -1.984113 | 1.558651  |
| H  | 2.855772  | -1.552406 | -3.408456 |
| H  | 5.441095  | -2.092863 | 0.045493  |
| H  | 5.147495  | -1.883823 | -2.439724 |
| C  | 2.589241  | 2.304225  | 0.041296  |
| C  | 2.276375  | 3.828012  | 0.088351  |
| H  | 3.230758  | 4.390562  | 0.138021  |

|   |          |          |           |
|---|----------|----------|-----------|
| H | 1.732514 | 4.156481 | -0.821117 |
| H | 1.675618 | 4.088660 | 0.983260  |
| C | 3.410406 | 1.957445 | -1.216850 |
| H | 3.627308 | 0.872216 | -1.264320 |
| H | 2.878535 | 2.244906 | -2.145265 |
| H | 4.374396 | 2.503582 | -1.185241 |
| C | 3.326565 | 1.866770 | 1.326607  |
| H | 4.292422 | 2.406197 | 1.395424  |
| H | 2.734906 | 2.092819 | 2.235337  |
| H | 3.539483 | 0.778819 | 1.308413  |

55

I-cat+SUBST+PIV-CO2+ SCF Done: -1229.72471018 A.U.

|    |           |           |           |
|----|-----------|-----------|-----------|
| Ru | -1.036693 | 0.244759  | 0.067782  |
| C  | -2.502141 | 1.880477  | 0.957490  |
| C  | -2.513937 | 0.586188  | 1.631693  |
| C  | -2.956952 | -0.601433 | 0.956736  |
| C  | -3.118772 | -0.631677 | -0.459686 |
| C  | -2.862099 | 0.617128  | -1.138636 |
| C  | -2.721317 | 1.867104  | -0.435622 |
| H  | -2.272753 | 0.536854  | 2.705298  |
| H  | -3.002157 | -1.536687 | 1.534157  |
| H  | -2.876403 | 0.631076  | -2.239922 |
| H  | -2.621951 | 2.799907  | -1.012383 |
| C  | -3.463355 | -1.888968 | -1.247803 |
| H  | -4.367979 | -1.614524 | -1.840007 |
| C  | -2.198510 | 3.126343  | 1.734798  |
| H  | -2.016227 | 3.993080  | 1.072270  |
| C  | -2.339737 | -2.255928 | -2.245026 |
| H  | -1.426460 | -2.553965 | -1.691124 |
| H  | -2.662840 | -3.104845 | -2.879304 |
| H  | -2.073898 | -1.417220 | -2.920178 |
| C  | -3.818985 | -3.085218 | -0.352839 |
| H  | -4.643334 | -2.853972 | 0.352872  |
| H  | -4.151513 | -3.935629 | -0.980045 |
| H  | -2.937364 | -3.429367 | 0.227609  |
| H  | -1.310492 | 2.971221  | 2.381164  |
| H  | -3.053304 | 3.368249  | 2.402290  |
| O  | 0.719014  | 1.154015  | 0.789453  |
| C  | 1.100193  | 1.456979  | -0.401996 |
| O  | 0.256886  | 1.108717  | -1.326913 |
| N  | -0.266286 | -1.373275 | 0.449530  |
| C  | 0.830336  | -1.557403 | 1.290922  |
| O  | 0.552757  | -1.578317 | 2.499454  |
| C  | 2.166348  | -1.759691 | 0.684866  |
| C  | 2.343547  | -1.696594 | -0.717258 |
| C  | 3.274572  | -1.963499 | 1.536030  |
| C  | 3.628837  | -1.831728 | -1.262542 |
| C  | 4.557673  | -2.088285 | 0.984654  |
| C  | 4.735080  | -2.023098 | -0.411667 |
| H  | 1.475210  | -1.540428 | -1.377762 |

|   |          |           |           |
|---|----------|-----------|-----------|
| H | 3.109476 | -2.011396 | 2.623417  |
| H | 3.772227 | -1.791475 | -2.353297 |
| H | 5.426322 | -2.240534 | 1.643523  |
| H | 5.743938 | -2.126274 | -0.840920 |
| C | 2.381162 | 2.199211  | -0.690969 |
| C | 2.041417 | 3.708738  | -0.516621 |
| H | 2.953676 | 4.307361  | -0.714524 |
| H | 1.257413 | 4.032272  | -1.231728 |
| H | 1.702553 | 3.927876  | 0.516225  |
| C | 2.835739 | 1.912390  | -2.136971 |
| H | 3.070430 | 0.837742  | -2.271610 |
| H | 2.061069 | 2.197584  | -2.875919 |
| H | 3.753179 | 2.495699  | -2.352736 |
| C | 3.456649 | 1.767809  | 0.331352  |
| H | 4.381845 | 2.351684  | 0.153040  |
| H | 3.124681 | 1.949091  | 1.372379  |
| H | 3.699417 | 0.691752  | 0.226701  |

58

I-cat+SUBST+PIV+ SCF Done: -1418.18939280 A.U.

|    |           |           |           |
|----|-----------|-----------|-----------|
| Ru | 1.148151  | 0.592578  | 0.118737  |
| C  | 2.680010  | 2.170254  | 0.326635  |
| C  | 3.055229  | 1.220502  | -0.704678 |
| C  | 3.146285  | -0.173538 | -0.436018 |
| C  | 2.831866  | -0.710877 | 0.869633  |
| C  | 2.423138  | 0.219462  | 1.876659  |
| C  | 2.366302  | 1.635927  | 1.611674  |
| H  | 3.206700  | 1.577390  | -1.735870 |
| H  | 3.361789  | -0.851596 | -1.272286 |
| H  | 2.113494  | -0.146447 | 2.866754  |
| H  | 1.974000  | 2.308202  | 2.390973  |
| C  | 2.906749  | -2.208643 | 1.171240  |
| H  | 3.764248  | -2.291455 | 1.880943  |
| C  | 2.540496  | 3.632686  | 0.006827  |
| H  | 1.931749  | 4.159738  | 0.766161  |
| C  | 1.655834  | -2.747558 | 1.892608  |
| H  | 0.780143  | -2.730296 | 1.212921  |
| H  | 1.820739  | -3.797667 | 2.204732  |
| H  | 1.395602  | -2.175159 | 2.805172  |
| C  | 3.233054  | -3.072058 | -0.057948 |
| H  | 4.200485  | -2.798825 | -0.525052 |
| H  | 3.306506  | -4.136782 | 0.239195  |
| H  | 2.437920  | -2.994463 | -0.828798 |
| H  | 2.069658  | 3.775636  | -0.985963 |
| H  | 3.544693  | 4.107032  | -0.020728 |
| O  | -0.107133 | 1.762340  | -1.147413 |
| C  | -1.029465 | 1.809370  | -0.248844 |
| O  | -0.715693 | 1.270721  | 0.878603  |
| N  | 0.084509  | -0.975769 | -0.766774 |
| C  | -1.108036 | -1.541953 | -0.711373 |
| O  | -1.375409 | -2.248876 | -1.839878 |

|   |           |           |           |
|---|-----------|-----------|-----------|
| C | -0.267873 | -2.147858 | -2.689211 |
| O | 0.654472  | -1.375447 | -2.008046 |
| O | -0.141466 | -2.634473 | -3.764596 |
| C | -2.100830 | -1.514987 | 0.350907  |
| C | -1.746098 | -1.222491 | 1.690783  |
| C | -3.450386 | -1.803763 | 0.019065  |
| C | -2.735457 | -1.202439 | 2.679706  |
| C | -4.431897 | -1.769920 | 1.017086  |
| C | -4.077407 | -1.467314 | 2.345614  |
| H | -0.699374 | -1.018632 | 1.949501  |
| H | -3.720872 | -2.044590 | -1.019515 |
| H | -2.459915 | -0.977526 | 3.720936  |
| H | -5.479882 | -1.983523 | 0.758357  |
| H | -4.851899 | -1.443882 | 3.127822  |
| C | -2.393022 | 2.413238  | -0.521565 |
| C | -2.185654 | 3.917702  | -0.833772 |
| H | -3.163650 | 4.383650  | -1.070820 |
| H | -1.754841 | 4.453129  | 0.037323  |
| H | -1.513427 | 4.057470  | -1.703766 |
| C | -3.308178 | 2.220450  | 0.702473  |
| H | -3.454686 | 1.145628  | 0.931135  |
| H | -2.887215 | 2.705413  | 1.605631  |
| H | -4.300079 | 2.670943  | 0.497464  |
| C | -2.978261 | 1.690013  | -1.761858 |
| H | -3.971298 | 2.118808  | -2.005671 |
| H | -2.319525 | 1.806262  | -2.645039 |
| H | -3.117833 | 0.607160  | -1.561725 |

68

II-III' SCF Done: -1741.04861597 A.U.

|    |           |           |           |
|----|-----------|-----------|-----------|
| Ru | 1.381443  | -0.499603 | -0.558088 |
| C  | 2.464175  | -1.611592 | -2.389727 |
| C  | 1.865768  | -2.547279 | -1.497125 |
| C  | 2.223632  | -2.614380 | -0.096888 |
| C  | 3.098610  | -1.671804 | 0.493664  |
| C  | 3.547924  | -0.589957 | -0.360217 |
| C  | 3.254774  | -0.587322 | -1.767795 |
| H  | 1.136238  | -3.274507 | -1.887104 |
| H  | 1.740851  | -3.377055 | 0.531131  |
| H  | 4.149443  | 0.228744  | 0.061667  |
| H  | 3.601526  | 0.270294  | -2.366145 |
| C  | 3.514206  | -1.707554 | 1.951220  |
| H  | 3.646881  | -0.645904 | 2.256645  |
| C  | 2.204112  | -1.611503 | -3.868477 |
| H  | 2.077102  | -0.577957 | -4.248263 |
| C  | -3.573861 | -1.167108 | 0.752635  |
| C  | -5.884680 | -2.407587 | -0.291669 |
| C  | -4.609999 | -2.758943 | -0.770737 |
| H  | -4.508451 | -3.522186 | -1.557888 |
| C  | -3.455809 | -2.150728 | -0.256822 |
| C  | 2.462196  | -2.335842 | 2.876163  |

|   |           |           |           |
|---|-----------|-----------|-----------|
| H | 2.348445  | -3.425790 | 2.698023  |
| H | 2.768790  | -2.213138 | 3.933800  |
| H | 1.473843  | -1.848068 | 2.746101  |
| C | 4.886128  | -2.413740 | 2.058848  |
| H | 5.652317  | -1.928001 | 1.420574  |
| H | 5.246679  | -2.384774 | 3.106814  |
| H | 4.807186  | -3.477737 | 1.752472  |
| H | 1.303652  | -2.202259 | -4.124778 |
| H | 3.068504  | -2.058128 | -4.405610 |
| H | -6.785403 | -2.889732 | -0.700678 |
| C | -4.851297 | -0.821538 | 1.247190  |
| C | -5.996041 | -1.441612 | 0.722456  |
| H | -6.985982 | -1.162382 | 1.114926  |
| H | -4.970777 | -0.063130 | 2.032842  |
| C | -0.386797 | 1.930151  | 3.304028  |
| C | -1.057590 | 0.975360  | 2.527754  |
| C | -0.321055 | 0.330063  | 1.532750  |
| C | 1.014073  | 0.545669  | 1.171082  |
| C | 1.676495  | 1.514545  | 1.946503  |
| C | 0.977517  | 2.168346  | 2.997830  |
| C | -2.480866 | 0.469234  | 2.392953  |
| N | -2.421436 | -0.503490 | 1.251680  |
| C | -1.148623 | -0.547468 | 0.767862  |
| H | -0.881424 | 2.498990  | 4.105663  |
| H | -2.466143 | -2.421047 | -0.645018 |
| H | 2.715256  | 1.810814  | 1.733282  |
| H | 1.519553  | 2.927736  | 3.583533  |
| H | -3.178407 | 1.292166  | 2.125525  |
| O | -0.645455 | -1.187375 | -0.225887 |
| H | -2.868324 | -0.040167 | 3.300925  |
| N | 0.935284  | 1.133241  | -1.380738 |
| O | 2.628436  | 2.410642  | -1.106097 |
| C | 2.124161  | 3.452775  | -0.630625 |
| O | 0.495799  | 3.354814  | -0.888099 |
| C | 0.112438  | 2.157956  | -1.184038 |
| O | 2.439231  | 4.456313  | -0.063909 |
| C | -1.347966 | 1.896860  | -1.310340 |
| C | -2.226350 | 2.674373  | -0.518569 |
| C | -1.854711 | 0.860335  | -2.126888 |
| H | -1.815853 | 3.481672  | 0.105548  |
| H | -1.164744 | 0.268447  | -2.745141 |
| C | -3.601692 | 2.398056  | -0.538780 |
| C | -3.232153 | 0.600439  | -2.144571 |
| H | -4.288035 | 3.006127  | 0.071314  |
| H | -3.629434 | -0.207063 | -2.776906 |
| C | -4.105733 | 1.360752  | -1.346378 |
| H | -5.183731 | 1.139418  | -1.351785 |

68

II-III SCF Done: -1741.06193088 A.U.

|    |          |           |          |
|----|----------|-----------|----------|
| Ru | 1.247363 | -0.468268 | 0.501328 |
|----|----------|-----------|----------|

|   |           |           |           |
|---|-----------|-----------|-----------|
| C | 2.683745  | -0.560213 | 2.397381  |
| C | 3.362910  | -0.257834 | 1.161753  |
| C | 3.337762  | -1.174487 | 0.053683  |
| C | 2.640954  | -2.425153 | 0.110442  |
| C | 1.818626  | -2.600796 | 1.257030  |
| C | 1.865048  | -1.715144 | 2.395982  |
| H | 3.951037  | 0.666381  | 1.070653  |
| H | 3.860542  | -0.874494 | -0.866130 |
| H | 1.132645  | -3.462375 | 1.295984  |
| H | 1.228056  | -1.929689 | 3.267710  |
| C | 2.639438  | -3.430525 | -1.032488 |
| H | 2.572615  | -4.434712 | -0.556891 |
| C | 2.790834  | 0.357491  | 3.578973  |
| H | 2.027662  | 0.129558  | 4.346830  |
| C | -0.808283 | 1.722105  | 1.303570  |
| C | 1.128356  | 3.771188  | 1.406024  |
| C | 1.484159  | 2.453689  | 1.075448  |
| H | 2.525534  | 2.258200  | 0.786691  |
| C | 0.553730  | 1.390106  | 1.049788  |
| C | 1.383109  | -3.237834 | -1.913489 |
| H | 1.413130  | -2.238571 | -2.395374 |
| H | 1.341305  | -4.011294 | -2.706551 |
| H | 0.452393  | -3.299738 | -1.312894 |
| C | 3.925199  | -3.383044 | -1.874963 |
| H | 4.835865  | -3.456987 | -1.245951 |
| H | 3.939211  | -4.227722 | -2.592156 |
| H | 3.988192  | -2.449499 | -2.472296 |
| H | 2.673658  | 1.414420  | 3.263845  |
| H | 3.795592  | 0.253928  | 4.040829  |
| H | 1.894428  | 4.561342  | 1.405254  |
| C | -1.167372 | 3.049795  | 1.652192  |
| C | -0.208523 | 4.066393  | 1.710303  |
| H | -0.514506 | 5.089881  | 1.974054  |
| H | -2.212040 | 3.303742  | 1.876092  |
| C | -5.387567 | -0.418000 | 0.992144  |
| C | -4.018518 | -0.140098 | 1.062500  |
| C | -3.072315 | -1.156354 | 0.830490  |
| C | -3.447434 | -2.474122 | 0.524841  |
| C | -4.821345 | -2.754559 | 0.457985  |
| C | -5.776691 | -1.738117 | 0.686958  |
| C | -3.287632 | 1.147712  | 1.321779  |
| N | -1.861980 | 0.771610  | 1.192094  |
| C | -1.743120 | -0.548610 | 0.891665  |
| H | -6.142327 | 0.364749  | 1.163427  |
| H | -2.686423 | -3.245454 | 0.335432  |
| H | -5.162256 | -3.774247 | 0.222401  |
| H | -6.848349 | -1.983103 | 0.624739  |
| H | -3.490775 | 1.556096  | 2.335000  |
| O | -0.667883 | -1.188482 | 0.666078  |
| H | -3.533222 | 1.926400  | 0.568396  |



|   |           |           |           |
|---|-----------|-----------|-----------|
| N | 1.128885  | 0.266352  | -1.214625 |
| C | 0.419262  | 1.120391  | -1.929635 |
| O | 0.891642  | 2.193775  | -2.478987 |
| C | 2.454993  | 2.457979  | -2.105783 |
| O | 2.897340  | 1.405101  | -1.582960 |
| O | 2.828886  | 3.554621  | -2.400770 |
| C | -1.025692 | 0.809191  | -2.121204 |
| C | -1.486092 | -0.517930 | -2.266973 |
| C | -1.942279 | 1.886023  | -2.105973 |
| C | -2.861027 | -0.765423 | -2.396489 |
| C | -3.315881 | 1.623771  | -2.222689 |
| C | -3.777749 | 0.300563  | -2.364047 |
| H | -0.763639 | -1.345113 | -2.284223 |
| H | -1.565359 | 2.914004  | -2.000730 |
| H | -3.221421 | -1.797881 | -2.517364 |
| H | -4.031393 | 2.461123  | -2.219794 |
| H | -4.856000 | 0.100058  | -2.457766 |

65

III-IV isomer SCF Done: -1552.58358350 A.U.

|    |           |           |           |
|----|-----------|-----------|-----------|
| Ru | 1.368492  | -0.422467 | 0.301946  |
| C  | 2.348899  | -1.905650 | 1.740574  |
| C  | 1.920446  | -0.746090 | 2.451784  |
| C  | 2.351824  | 0.582315  | 2.087935  |
| C  | 3.180734  | 0.790852  | 0.954851  |
| C  | 3.533140  | -0.372087 | 0.159029  |
| C  | 3.129251  | -1.688447 | 0.540587  |
| H  | 1.217523  | -0.860144 | 3.291400  |
| H  | 1.973801  | 1.437650  | 2.664599  |
| H  | 4.109543  | -0.235302 | -0.769388 |
| H  | 3.387137  | -2.542743 | -0.104399 |
| C  | 3.637819  | 2.169494  | 0.509459  |
| H  | 3.754281  | 2.115665  | -0.595747 |
| C  | 1.901164  | -3.289064 | 2.121158  |
| H  | 1.548483  | -3.855552 | 1.235624  |
| C  | -3.301580 | 1.851187  | 0.681466  |
| C  | -5.615091 | 1.716175  | 2.290493  |
| C  | -4.651363 | 0.693792  | 2.344289  |
| H  | -4.799889 | -0.169178 | 3.011712  |
| C  | -3.499104 | 0.748782  | 1.547021  |
| C  | 2.632417  | 3.288816  | 0.818128  |
| H  | 2.534238  | 3.472065  | 1.908594  |
| H  | 2.974265  | 4.238964  | 0.361687  |
| H  | 1.628979  | 3.051934  | 0.408124  |
| C  | 5.027526  | 2.448444  | 1.127262  |
| H  | 5.761358  | 1.657836  | 0.868319  |
| H  | 5.423191  | 3.416000  | 0.757414  |
| H  | 4.961992  | 2.505307  | 2.233974  |
| H  | 1.087130  | -3.265329 | 2.870348  |
| H  | 2.757288  | -3.846628 | 2.559081  |
| H  | -6.517883 | 1.662658  | 2.917612  |

|   |           |           |           |
|---|-----------|-----------|-----------|
| C | -4.271169 | 2.878350  | 0.620235  |
| C | -5.419294 | 2.804359  | 1.423267  |
| H | -6.167280 | 3.610099  | 1.367564  |
| H | -4.141858 | 3.742757  | -0.045945 |
| C | 0.012382  | 2.947914  | -3.064121 |
| C | -0.704345 | 2.532507  | -1.931362 |
| C | -0.143661 | 1.528888  | -1.147613 |
| C | 1.063977  | 0.863268  | -1.385223 |
| C | 1.760390  | 1.243006  | -2.544440 |
| C | 1.238445  | 2.293450  | -3.342758 |
| C | -2.047964 | 2.854419  | -1.311644 |
| N | -2.144360 | 1.924179  | -0.141806 |
| C | -1.011299 | 1.168341  | -0.058958 |
| H | -0.361563 | 3.728721  | -3.743528 |
| H | -2.758923 | -0.060076 | 1.583863  |
| H | 2.681836  | 0.726742  | -2.854918 |
| H | 1.800597  | 2.592814  | -4.241419 |
| H | -2.891806 | 2.655495  | -2.006513 |
| O | -0.669306 | 0.269997  | 0.782205  |
| H | -2.121169 | 3.908328  | -0.967967 |
| N | 0.609883  | -1.233983 | -1.243167 |
| O | -1.314316 | -0.753398 | -2.510265 |
| C | -0.654472 | -1.424620 | -1.718296 |
| C | -1.083108 | -2.801590 | -1.219667 |
| C | -1.108662 | -3.120301 | 0.155718  |
| C | -1.552213 | -3.730100 | -2.175917 |
| H | -0.745025 | -2.383785 | 0.890028  |
| H | -1.542060 | -3.457637 | -3.242108 |
| C | -1.627266 | -4.355531 | 0.576581  |
| C | -2.054030 | -4.967222 | -1.748193 |
| H | -1.669458 | -4.597839 | 1.650093  |
| H | -2.427768 | -5.690533 | -2.489665 |
| C | -2.089933 | -5.283044 | -0.374756 |
| H | -2.483457 | -6.257599 | -0.046084 |

65

III-IV' SCF Done: -1552.59194840 A.U.

|    |           |           |           |
|----|-----------|-----------|-----------|
| Ru | -0.733624 | 0.458823  | -0.506642 |
| C  | -2.294073 | 0.305115  | -2.157148 |
| C  | -1.004562 | 0.563147  | -2.729410 |
| C  | -0.230111 | 1.726105  | -2.375845 |
| C  | -0.661781 | 2.597460  | -1.346037 |
| C  | -1.902527 | 2.263761  | -0.667579 |
| C  | -2.722108 | 1.167379  | -1.084593 |
| H  | -0.593857 | -0.142975 | -3.467294 |
| H  | 0.748908  | 1.873517  | -2.852803 |
| H  | -2.224689 | 2.865173  | 0.196424  |
| H  | -3.656520 | 0.953294  | -0.542385 |
| C  | 0.151517  | 3.788802  | -0.867385 |
| H  | -0.108112 | 3.925654  | 0.206084  |
| C  | -3.111631 | -0.897361 | -2.534144 |

|   |           |           |           |
|---|-----------|-----------|-----------|
| H | -3.514229 | -1.402558 | -1.631390 |
| C | 4.080940  | -1.508852 | -0.046298 |
| C | 5.841887  | -3.216792 | -1.446248 |
| C | 4.498838  | -3.098286 | -1.844438 |
| H | 4.126056  | -3.675438 | -2.704825 |
| C | 3.614514  | -2.255315 | -1.155863 |
| C | 1.670482  | 3.575683  | -0.954207 |
| H | 2.025392  | 3.520149  | -2.004553 |
| H | 2.198768  | 4.426826  | -0.480368 |
| H | 1.976077  | 2.646812  | -0.429567 |
| C | -0.306320 | 5.047360  | -1.638853 |
| H | -1.397953 | 5.217680  | -1.539197 |
| H | 0.216072  | 5.945718  | -1.252073 |
| H | -0.071883 | 4.953266  | -2.719950 |
| H | -2.523304 | -1.628235 | -3.120173 |
| H | -3.979246 | -0.573889 | -3.149339 |
| H | 6.527426  | -3.883114 | -1.991377 |
| C | 5.430935  | -1.629506 | 0.359537  |
| C | 6.299705  | -2.479691 | -0.341230 |
| H | 7.347516  | -2.564231 | -0.014414 |
| H | 5.820786  | -1.067986 | 1.219736  |
| C | 2.085489  | 1.762961  | 3.349046  |
| C | 2.405728  | 0.870348  | 2.313574  |
| C | 1.414551  | 0.568861  | 1.382091  |
| C | 0.113211  | 1.084411  | 1.370100  |
| C | -0.228168 | 1.944503  | 2.425545  |
| C | 0.769086  | 2.284222  | 3.377985  |
| C | 3.632248  | 0.082048  | 1.902383  |
| N | 3.204702  | -0.645886 | 0.667837  |
| C | 1.906284  | -0.327537 | 0.367994  |
| H | 2.810648  | 2.046734  | 4.126704  |
| H | 2.566481  | -2.174525 | -1.469429 |
| H | -1.256879 | 2.312236  | 2.543734  |
| H | 0.491923  | 2.970435  | 4.193869  |
| H | 3.949455  | -0.646408 | 2.679597  |
| O | 1.178397  | -0.667503 | -0.618435 |
| H | 4.501083  | 0.735070  | 1.670641  |
| N | -1.149625 | -0.634301 | 0.965550  |
| O | -2.865495 | 0.393620  | 2.154907  |
| C | -2.430931 | -0.566923 | 1.512456  |
| C | -3.253198 | -1.767735 | 1.133128  |
| C | -2.676008 | -2.975823 | 0.672858  |
| C | -4.659019 | -1.620678 | 1.163795  |
| H | -1.581715 | -3.089840 | 0.666863  |
| H | -5.083061 | -0.675833 | 1.538028  |
| C | -3.505656 | -4.023220 | 0.242557  |
| C | -5.480373 | -2.672318 | 0.732488  |
| H | -3.060075 | -4.967905 | -0.105765 |
| H | -6.575505 | -2.561042 | 0.762246  |
| C | -4.904971 | -3.871795 | 0.268104  |

|                  |                     |           |           |
|------------------|---------------------|-----------|-----------|
| H                | -5.552738           | -4.696430 | -0.068439 |
| 65               |                     |           |           |
| III-IV SCF Done: | -1552.60448151 A.U. |           |           |
| Ru               | 1.450844            | -0.078827 | -0.243573 |
| C                | 3.402601            | -0.973542 | -1.184894 |
| C                | 3.616822            | -0.367297 | 0.115688  |
| C                | 3.300578            | 0.997808  | 0.384218  |
| C                | 2.677525            | 1.810336  | -0.626538 |
| C                | 2.354023            | 1.169339  | -1.865559 |
| C                | 2.749485            | -0.185936 | -2.159268 |
| H                | 4.080791            | -0.970871 | 0.909659  |
| H                | 3.494558            | 1.407239  | 1.385718  |
| H                | 1.773412            | 1.724650  | -2.618594 |
| H                | 2.473163            | -0.627982 | -3.128425 |
| C                | 2.282619            | 3.254900  | -0.380677 |
| H                | 1.359416            | 3.432183  | -0.976714 |
| C                | 3.778913            | -2.409748 | -1.416823 |
| H                | 3.331463            | -2.806260 | -2.347779 |
| C                | -0.235044           | -2.666213 | 0.361644  |
| C                | 1.666514            | -3.807797 | 2.117439  |
| C                | 1.812634            | -2.488635 | 1.662468  |
| H                | 2.620151            | -1.869300 | 2.075258  |
| C                | 0.926636            | -1.929288 | 0.720591  |
| C                | 1.972300            | 3.573220  | 1.090217  |
| H                | 2.890171            | 3.567262  | 1.714564  |
| H                | 1.532733            | 4.586864  | 1.171109  |
| H                | 1.247790            | 2.850899  | 1.518594  |
| C                | 3.397467            | 4.169189  | -0.947059 |
| H                | 3.579747            | 3.981645  | -2.024775 |
| H                | 3.110396            | 5.233120  | -0.824968 |
| H                | 4.351610            | 4.008847  | -0.402902 |
| H                | 3.448285            | -3.041154 | -0.566478 |
| H                | 4.883335            | -2.501229 | -1.493002 |
| H                | 2.379871            | -4.219660 | 2.847274  |
| C                | -0.357060           | -4.008539 | 0.791816  |
| C                | 0.590309            | -4.579962 | 1.649813  |
| H                | 0.461645            | -5.620668 | 1.983474  |
| H                | -1.214990           | -4.611816 | 0.464037  |
| C                | -4.918257           | -1.502810 | -1.093490 |
| C                | -3.533811           | -1.585072 | -0.907808 |
| C                | -2.682920           | -0.604627 | -1.456657 |
| C                | -3.172886           | 0.488757  | -2.190217 |
| C                | -4.560988           | 0.570083  | -2.375637 |
| C                | -5.419610           | -0.414477 | -1.834738 |
| C                | -2.700430           | -2.581875 | -0.151480 |
| N                | -1.316474           | -2.093682 | -0.348754 |
| C                | -1.314554           | -0.923753 | -1.053766 |
| H                | -5.599904           | -2.255892 | -0.669502 |
| H                | -2.486209           | 1.247690  | -2.592454 |
| H                | -4.990200           | 1.409399  | -2.943599 |

|   |           |           |           |
|---|-----------|-----------|-----------|
| H | -6.505833 | -0.325197 | -1.991384 |
| H | -2.821288 | -3.613710 | -0.543360 |
| O | -0.307205 | -0.195699 | -1.312411 |
| H | -2.912799 | -2.578753 | 0.940244  |
| N | 0.416337  | 0.194101  | 1.300771  |
| C | -0.888859 | 0.164845  | 1.699165  |
| O | -1.469382 | -0.780301 | 2.252190  |
| C | -1.529637 | 1.533331  | 1.549019  |
| C | -1.326754 | 2.366390  | 0.426185  |
| C | -2.425883 | 1.929912  | 2.567004  |
| C | -2.022045 | 3.580757  | 0.319509  |
| C | -3.108668 | 3.149971  | 2.459706  |
| C | -2.907030 | 3.978432  | 1.338520  |
| H | -0.642923 | 2.047278  | -0.373547 |
| H | -2.584940 | 1.257952  | 3.423953  |
| H | -1.875210 | 4.221574  | -0.564304 |
| H | -3.806462 | 3.457255  | 3.254297  |
| H | -3.445220 | 4.935869  | 1.258123  |

65

III' SCF Done: -1552.60942295 A.U.

|    |           |           |           |
|----|-----------|-----------|-----------|
| Ru | 1.567877  | -0.629086 | -0.269728 |
| C  | 2.873199  | -2.643317 | -0.079439 |
| C  | 2.373173  | -2.216025 | 1.191706  |
| C  | 2.752713  | -0.951497 | 1.781615  |
| C  | 3.462609  | 0.013628  | 1.042942  |
| C  | 3.723956  | -0.308587 | -0.351251 |
| C  | 3.507252  | -1.634211 | -0.866129 |
| H  | 1.759831  | -2.909591 | 1.788170  |
| H  | 2.406699  | -0.721776 | 2.799746  |
| H  | 4.207238  | 0.444107  | -0.993450 |
| H  | 3.780905  | -1.850495 | -1.911457 |
| C  | 3.873438  | 1.364841  | 1.594249  |
| H  | 3.850327  | 2.067767  | 0.731860  |
| C  | 2.629862  | -4.019843 | -0.625922 |
| H  | 2.290745  | -3.966785 | -1.680221 |
| C  | -3.188007 | 0.245265  | 1.523882  |
| C  | -5.349729 | -1.248314 | 2.554457  |
| C  | -4.052036 | -1.789941 | 2.542753  |
| H  | -3.874150 | -2.802983 | 2.935894  |
| C  | -2.970953 | -1.054931 | 2.035898  |
| C  | 2.914762  | 1.906326  | 2.664903  |
| H  | 2.957296  | 1.311672  | 3.601502  |
| H  | 3.192935  | 2.945472  | 2.930523  |
| H  | 1.868324  | 1.913645  | 2.295049  |
| C  | 5.331661  | 1.276134  | 2.102728  |
| H  | 6.024880  | 0.922870  | 1.311977  |
| H  | 5.678175  | 2.273982  | 2.439531  |
| H  | 5.407323  | 0.578324  | 2.962678  |
| H  | 1.873728  | -4.568512 | -0.032837 |
| H  | 3.573508  | -4.606116 | -0.607153 |

|   |           |           |           |
|---|-----------|-----------|-----------|
| H | -6.192955 | -1.832138 | 2.953494  |
| C | -4.486863 | 0.799828  | 1.548727  |
| C | -5.557393 | 0.050693  | 2.061099  |
| H | -6.565782 | 0.492345  | 2.071560  |
| H | -4.681886 | 1.807776  | 1.158177  |
| C | -0.348591 | 3.841306  | -0.770831 |
| C | -0.917288 | 2.748332  | -0.103939 |
| C | -0.139522 | 1.594446  | 0.006587  |
| C | 1.135385  | 1.359144  | -0.524118 |
| C | 1.695616  | 2.459422  | -1.198105 |
| C | 0.959777  | 3.670143  | -1.293194 |
| C | -2.266242 | 2.405201  | 0.499315  |
| N | -2.116234 | 0.984041  | 0.956416  |
| C | -0.868890 | 0.542131  | 0.634402  |
| H | -0.881839 | 4.792935  | -0.915631 |
| H | -1.964400 | -1.490516 | 2.016427  |
| H | 2.674172  | 2.392690  | -1.698674 |
| H | 1.419435  | 4.513765  | -1.832484 |
| H | -3.070495 | 2.448520  | -0.266972 |
| O | -0.317907 | -0.610721 | 0.772839  |
| H | -2.558953 | 3.048811  | 1.356017  |
| N | 0.808480  | -1.046009 | -1.908068 |
| O | 0.253975  | 0.499034  | -3.393071 |
| C | -0.175899 | -0.318735 | -2.564128 |
| C | -1.612029 | -0.531409 | -2.241652 |
| C | -2.060204 | -1.675765 | -1.545093 |
| C | -2.523465 | 0.494141  | -2.581473 |
| H | -1.343486 | -2.469368 | -1.284415 |
| H | -2.148844 | 1.373584  | -3.128149 |
| C | -3.411709 | -1.790113 | -1.187132 |
| C | -3.870614 | 0.380053  | -2.207493 |
| H | -3.764552 | -2.677638 | -0.641280 |
| H | -4.583585 | 1.178261  | -2.468166 |
| C | -4.314829 | -0.761087 | -1.510362 |
| H | -5.370291 | -0.847120 | -1.210265 |

65

III SCF Done: -1552.62146084 A.U.

|    |           |           |           |
|----|-----------|-----------|-----------|
| Ru | -1.494690 | 0.030365  | -0.070449 |
| C  | -3.542296 | 0.603647  | -1.330788 |
| C  | -3.734553 | 0.197745  | 0.046662  |
| C  | -3.368671 | -1.106162 | 0.516145  |
| C  | -2.684005 | -2.020331 | -0.346909 |
| C  | -2.252864 | -1.496087 | -1.601876 |
| C  | -2.727244 | -0.231123 | -2.116280 |
| H  | -4.311380 | 0.848191  | 0.720550  |
| H  | -3.621419 | -1.393598 | 1.546606  |
| H  | -1.590223 | -2.104288 | -2.237372 |
| H  | -2.428664 | 0.078744  | -3.129019 |
| C  | -2.328500 | -3.435062 | 0.066024  |
| H  | -1.375359 | -3.683261 | -0.453446 |

|   |           |           |           |
|---|-----------|-----------|-----------|
| C | -4.084247 | 1.912610  | -1.823202 |
| H | -3.771593 | 2.123692  | -2.862981 |
| C | 0.086578  | 2.688996  | 0.173967  |
| C | -2.032680 | 4.144066  | 1.337337  |
| C | -2.192743 | 2.798700  | 0.965256  |
| H | -3.150469 | 2.324106  | 1.211783  |
| C | -1.172198 | 2.037374  | 0.353644  |
| C | -2.122788 | -3.612574 | 1.578688  |
| H | -3.080351 | -3.529667 | 2.134164  |
| H | -1.716233 | -4.621888 | 1.787574  |
| H | -1.419925 | -2.855438 | 1.983884  |
| C | -3.420624 | -4.387450 | -0.483584 |
| H | -3.528174 | -4.304547 | -1.584248 |
| H | -3.161220 | -5.437353 | -0.239206 |
| H | -4.405113 | -4.163559 | -0.022272 |
| H | -3.738299 | 2.744902  | -1.174200 |
| H | -5.193772 | 1.901676  | -1.781855 |
| H | -2.861905 | 4.680389  | 1.823396  |
| C | 0.243799  | 4.048448  | 0.535156  |
| C | -0.807032 | 4.778657  | 1.101328  |
| H | -0.654612 | 5.834280  | 1.371883  |
| H | 1.205502  | 4.553331  | 0.373278  |
| C | 4.876406  | 1.405709  | -0.843514 |
| C | 3.485011  | 1.493002  | -0.734669 |
| C | 2.664532  | 0.465536  | -1.243266 |
| C | 3.192106  | -0.672868 | -1.871807 |
| C | 4.588040  | -0.757398 | -1.983879 |
| C | 5.416759  | 0.267569  | -1.475581 |
| C | 2.611051  | 2.545132  | -0.107980 |
| N | 1.243143  | 2.019594  | -0.307721 |
| C | 1.279731  | 0.803169  | -0.914121 |
| H | 5.534107  | 2.194143  | -0.446658 |
| H | 2.529284  | -1.469156 | -2.238390 |
| H | 5.045588  | -1.635262 | -2.464426 |
| H | 6.509557  | 0.173977  | -1.572504 |
| H | 2.733743  | 3.531361  | -0.603671 |
| O | 0.282433  | 0.048381  | -1.132260 |
| H | 2.792366  | 2.672512  | 0.981422  |
| N | -0.560879 | -0.545943 | 1.409617  |
| C | 0.739709  | -0.296267 | 1.787752  |
| O | 0.940635  | 0.722695  | 2.475644  |
| C | 1.802528  | -1.279561 | 1.421711  |
| C | 1.520735  | -2.447964 | 0.681267  |
| C | 3.134387  | -0.977393 | 1.779621  |
| C | 2.562714  | -3.308402 | 0.305831  |
| C | 4.174725  | -1.834933 | 1.396123  |
| C | 3.889769  | -3.001947 | 0.662070  |
| H | 0.481575  | -2.675414 | 0.402238  |
| H | 3.329648  | -0.060002 | 2.356024  |
| H | 2.343302  | -4.224408 | -0.264632 |

|   |          |           |          |
|---|----------|-----------|----------|
| H | 5.213709 | -1.595571 | 1.669656 |
| H | 4.707492 | -3.677137 | 0.365045 |

75

I-6+SUBSTSBF6 SCF Done: -2345.44066956 A.U.

|    |           |           |           |
|----|-----------|-----------|-----------|
| Ru | 2.152482  | -0.405651 | -0.576866 |
| C  | 3.491141  | -1.427024 | -2.032244 |
| C  | 3.769122  | -1.879411 | -0.684111 |
| C  | 4.079326  | -0.952579 | 0.351507  |
| C  | 4.259806  | 0.463361  | 0.079546  |
| C  | 3.973169  | 0.908656  | -1.228773 |
| C  | 3.531537  | -0.018275 | -2.249744 |
| H  | 3.679147  | -2.949755 | -0.447534 |
| H  | 4.211317  | -1.333878 | 1.375346  |
| H  | 4.007783  | 1.984765  | -1.460804 |
| H  | 3.214220  | 0.379735  | -3.226732 |
| C  | 4.767209  | 1.412047  | 1.156292  |
| H  | 4.590491  | 2.447372  | 0.787405  |
| C  | 3.101996  | -2.403578 | -3.109208 |
| H  | 2.587340  | -1.891856 | -3.945610 |
| C  | -0.310917 | -1.848787 | -1.763182 |
| C  | 0.271204  | -4.313154 | -0.533375 |
| C  | 0.984464  | -3.149984 | -0.197986 |
| H  | 1.722491  | -3.203537 | 0.616049  |
| C  | 0.770063  | -1.910535 | -0.841198 |
| C  | 4.057152  | 1.266298  | 2.514430  |
| H  | 4.160658  | 0.243830  | 2.932028  |
| H  | 4.498008  | 1.968301  | 3.250678  |
| H  | 2.977583  | 1.494488  | 2.437943  |
| C  | 6.294061  | 1.215476  | 1.300174  |
| H  | 6.815056  | 1.354703  | 0.330915  |
| H  | 6.713748  | 1.940015  | 2.028375  |
| H  | 6.526253  | 0.193141  | 1.667403  |
| H  | 2.417022  | -3.175843 | -2.703382 |
| H  | 4.003469  | -2.912451 | -3.512270 |
| H  | 0.466682  | -5.252592 | 0.007143  |
| C  | -0.985817 | -3.029803 | -2.151166 |
| C  | -0.689144 | -4.259127 | -1.553648 |
| H  | -1.246597 | -5.159252 | -1.854048 |
| H  | -1.794854 | -2.983794 | -2.892268 |
| C  | -3.567870 | 1.707371  | -3.226814 |
| C  | -2.438181 | 0.976846  | -2.842986 |
| C  | -1.282801 | 1.640344  | -2.393594 |
| C  | -1.206270 | 3.037788  | -2.308834 |
| C  | -2.337127 | 3.771594  | -2.699634 |
| C  | -3.502490 | 3.112546  | -3.152100 |
| C  | -2.211800 | -0.502413 | -2.744120 |
| N  | -0.815120 | -0.612702 | -2.259661 |
| C  | -0.313150 | 0.622525  | -1.981089 |
| H  | -4.489280 | 1.202059  | -3.553736 |
| H  | -0.299377 | 3.523103  | -1.921968 |



|    |           |           |           |
|----|-----------|-----------|-----------|
| H  | -2.323474 | 4.871040  | -2.639501 |
| H  | -4.383091 | 3.709121  | -3.438228 |
| H  | -2.343760 | -1.025774 | -3.714735 |
| O  | 0.793971  | 0.897566  | -1.432291 |
| H  | -2.880841 | -0.964805 | -1.986400 |
| N  | 1.204471  | -0.058315 | 1.224892  |
| C  | 0.476481  | 0.890443  | 1.765346  |
| O  | 0.049953  | 0.551408  | 3.006932  |
| C  | 0.551490  | -0.719436 | 3.295197  |
| O  | 1.292920  | -1.091918 | 2.191031  |
| O  | 0.445422  | -1.319064 | 4.317326  |
| C  | 0.221483  | 2.250104  | 1.285143  |
| C  | 1.231347  | 2.978354  | 0.617220  |
| C  | -1.022793 | 2.855120  | 1.574556  |
| C  | 1.007730  | 4.316612  | 0.266097  |
| C  | -1.241589 | 4.187699  | 1.197345  |
| C  | -0.228381 | 4.924204  | 0.557142  |
| H  | 2.186042  | 2.491142  | 0.378327  |
| H  | -1.813649 | 2.259152  | 2.054342  |
| H  | 1.800823  | 4.887417  | -0.241815 |
| H  | -2.217104 | 4.653122  | 1.405573  |
| H  | -0.404525 | 5.974312  | 0.274774  |
| Sb | -3.012821 | -0.787826 | 1.124764  |
| F  | -1.636685 | 0.262978  | 0.211429  |
| F  | -2.879320 | -2.177129 | -0.219576 |
| F  | -4.335572 | -1.777094 | 2.084107  |
| F  | -3.087700 | 0.643622  | 2.424194  |
| F  | -1.538789 | -1.606199 | 2.084996  |
| F  | -4.280073 | 0.093596  | -0.030246 |

68

II' SCF Done: -1741.06519411 A.U.

|    |           |           |           |
|----|-----------|-----------|-----------|
| Ru | 1.539787  | 0.115890  | -0.572382 |
| C  | 2.466661  | 1.072948  | -2.485052 |
| C  | 1.953031  | -0.204937 | -2.805474 |
| C  | 2.289490  | -1.366644 | -2.007757 |
| C  | 3.203476  | -1.302088 | -0.912596 |
| C  | 3.701733  | 0.013067  | -0.558064 |
| C  | 3.305868  | 1.165797  | -1.302224 |
| H  | 1.233977  | -0.314510 | -3.631948 |
| H  | 1.795308  | -2.320922 | -2.240727 |
| H  | 4.350973  | 0.134139  | 0.322575  |
| H  | 3.635900  | 2.158083  | -0.955382 |
| C  | 3.619895  | -2.519556 | -0.104101 |
| H  | 3.815855  | -2.151031 | 0.927504  |
| C  | 2.100275  | 2.313288  | -3.254594 |
| H  | 1.840771  | 3.146166  | -2.569752 |
| C  | -3.292899 | -1.592836 | 0.177481  |
| C  | -5.666224 | -1.855139 | -1.326487 |
| C  | -4.411501 | -1.947576 | -1.955096 |
| H  | -4.350379 | -2.127076 | -3.039791 |

|   |           |           |           |
|---|-----------|-----------|-----------|
| C | -3.226902 | -1.821026 | -1.215679 |
| C | 2.532724  | -3.600267 | -0.011190 |
| H | 2.348209  | -4.090384 | -0.990198 |
| H | 2.849455  | -4.396008 | 0.692073  |
| H | 1.576543  | -3.175426 | 0.358089  |
| C | 4.941867  | -3.073401 | -0.680290 |
| H | 5.736116  | -2.299279 | -0.707297 |
| H | 5.308707  | -3.917319 | -0.061467 |
| H | 4.794407  | -3.447047 | -1.715415 |
| H | 1.246137  | 2.136438  | -3.936620 |
| H | 2.963105  | 2.649909  | -3.868278 |
| H | -6.591431 | -1.960713 | -1.913220 |
| C | -4.550908 | -1.508218 | 0.814407  |
| C | -5.727943 | -1.639688 | 0.060649  |
| H | -6.702717 | -1.573209 | 0.568135  |
| H | -4.623072 | -1.331495 | 1.896851  |
| C | 0.179673  | -1.322938 | 3.939567  |
| C | -0.589292 | -1.357253 | 2.768309  |
| C | 0.033851  | -0.962792 | 1.581205  |
| C | 1.340286  | -0.485689 | 1.397196  |
| C | 2.095112  | -0.443889 | 2.588209  |
| C | 1.518519  | -0.871305 | 3.814901  |
| C | -2.030437 | -1.677307 | 2.412418  |
| N | -2.101068 | -1.440068 | 0.934698  |
| C | -0.877986 | -1.032422 | 0.478507  |
| H | -0.218587 | -1.616504 | 4.922574  |
| H | -2.251115 | -1.885977 | -1.713391 |
| H | 3.128095  | -0.059975 | 2.597320  |
| H | 2.140208  | -0.829526 | 4.723889  |
| H | -2.738644 | -1.003325 | 2.940689  |
| O | -0.497698 | -0.707314 | -0.694292 |
| H | -2.331165 | -2.724060 | 2.633598  |
| N | 0.713110  | 1.857740  | 0.216326  |
| O | 1.587727  | 2.559608  | 1.101035  |
| C | 0.833184  | 3.400622  | 1.890745  |
| O | -0.487377 | 3.265008  | 1.441998  |
| C | -0.490320 | 2.347409  | 0.439880  |
| O | 1.220427  | 4.106768  | 2.764955  |
| C | -1.737384 | 2.033815  | -0.242161 |
| C | -2.953084 | 2.094096  | 0.481560  |
| C | -1.739256 | 1.685735  | -1.614499 |
| H | -2.942895 | 2.375947  | 1.545168  |
| H | -0.788436 | 1.642877  | -2.165374 |
| C | -4.157573 | 1.782941  | -0.164094 |
| C | -2.951521 | 1.402161  | -2.251672 |
| H | -5.102657 | 1.808660  | 0.398047  |
| H | -2.958424 | 1.135818  | -3.319226 |
| C | -4.158609 | 1.443530  | -1.529046 |
| H | -5.106628 | 1.197701  | -2.030115 |

68

II SCF Done: -1741.07314794 A.U.

|    |           |           |           |
|----|-----------|-----------|-----------|
| Ru | 1.043902  | 0.503821  | 0.585321  |
| C  | 1.684038  | 1.999193  | 2.124840  |
| C  | 2.795014  | 1.638660  | 1.270991  |
| C  | 3.170400  | 0.273316  | 1.102970  |
| C  | 2.553235  | -0.797270 | 1.864404  |
| C  | 1.439763  | -0.443777 | 2.657903  |
| C  | 0.983279  | 0.927398  | 2.751839  |
| H  | 3.328007  | 2.423188  | 0.714198  |
| H  | 3.976143  | 0.038594  | 0.390899  |
| H  | 0.867579  | -1.231232 | 3.173899  |
| H  | 0.070611  | 1.147606  | 3.327608  |
| C  | 3.081505  | -2.222408 | 1.812391  |
| H  | 2.275008  | -2.880538 | 2.207146  |
| C  | 1.261094  | 3.433792  | 2.280109  |
| H  | 0.208088  | 3.509969  | 2.613266  |
| C  | -0.980207 | 2.506837  | -0.681945 |
| C  | 1.002824  | 4.021420  | -1.990446 |
| C  | 1.329965  | 2.846265  | -1.292945 |
| H  | 2.375897  | 2.508436  | -1.312899 |
| C  | 0.375335  | 2.073406  | -0.590132 |
| C  | 3.442222  | -2.707503 | 0.397253  |
| H  | 4.273931  | -2.120375 | -0.044216 |
| H  | 3.775597  | -3.763834 | 0.432088  |
| H  | 2.576549  | -2.649014 | -0.290738 |
| C  | 4.292508  | -2.331340 | 2.768105  |
| H  | 4.026363  | -2.026788 | 3.800493  |
| H  | 4.667558  | -3.374650 | 2.800288  |
| H  | 5.125427  | -1.682143 | 2.424239  |
| H  | 1.366288  | 3.982323  | 1.323095  |
| H  | 1.901471  | 3.932713  | 3.038093  |
| H  | 1.788249  | 4.582936  | -2.519678 |
| C  | -1.311283 | 3.707455  | -1.360206 |
| C  | -0.327052 | 4.466497  | -2.004055 |
| H  | -0.608170 | 5.392527  | -2.527904 |
| H  | -2.351393 | 4.058580  | -1.402440 |
| C  | -5.601722 | 0.868743  | 0.617375  |
| C  | -4.230330 | 1.045112  | 0.402723  |
| C  | -3.319174 | 0.024149  | 0.736225  |
| C  | -3.734909 | -1.202186 | 1.279489  |
| C  | -5.111584 | -1.381022 | 1.490150  |
| C  | -6.030250 | -0.357090 | 1.166199  |
| C  | -3.463126 | 2.202867  | -0.179463 |
| N  | -2.055004 | 1.754119  | -0.121037 |
| C  | -1.970966 | 0.499478  | 0.411289  |
| H  | -6.328917 | 1.655915  | 0.365395  |
| H  | -2.999686 | -1.986213 | 1.512335  |
| H  | -5.483533 | -2.327178 | 1.912174  |
| H  | -7.104482 | -0.521219 | 1.343581  |
| H  | -3.593197 | 3.144793  | 0.396637  |

|   |           |           |           |
|---|-----------|-----------|-----------|
| O | -0.917746 | -0.172073 | 0.607657  |
| H | -3.759318 | 2.404641  | -1.231739 |
| N | 1.227762  | -0.504216 | -1.211810 |
| C | 0.607072  | -1.471054 | -1.857402 |
| O | 1.014053  | -1.551862 | -3.154769 |
| C | 2.005995  | -0.587377 | -3.352079 |
| O | 2.165703  | 0.041894  | -2.135370 |
| O | 2.598363  | -0.364647 | -4.358711 |
| C | -0.354523 | -2.451704 | -1.365796 |
| C | -0.350781 | -2.870045 | -0.012818 |
| C | -1.258939 | -3.038600 | -2.285103 |
| C | -1.245833 | -3.859463 | 0.409986  |
| C | -2.164657 | -4.013534 | -1.844609 |
| C | -2.159559 | -4.426302 | -0.499692 |
| H | 0.358784  | -2.421304 | 0.694838  |
| H | -1.247279 | -2.725486 | -3.339708 |
| H | -1.228714 | -4.197072 | 1.457816  |
| H | -2.872780 | -4.461148 | -2.558332 |
| H | -2.864173 | -5.201417 | -0.160410 |

68

I,+PIVOH+ SCF Done: -1499.99408666 A.U.

|    |           |           |           |
|----|-----------|-----------|-----------|
| Ru | 1.368152  | -0.079414 | -0.447156 |
| C  | 2.834455  | 0.578153  | -2.132617 |
| C  | 1.994566  | -0.441617 | -2.629963 |
| C  | 1.782324  | -1.657758 | -1.871864 |
| C  | 2.498359  | -1.948287 | -0.665603 |
| C  | 3.347247  | -0.893798 | -0.151425 |
| C  | 3.461465  | 0.353053  | -0.838757 |
| H  | 1.417308  | -0.275753 | -3.552232 |
| H  | 1.033125  | -2.375472 | -2.237442 |
| H  | 3.856210  | -1.028381 | 0.815908  |
| H  | 4.041821  | 1.167563  | -0.376464 |
| C  | 2.366805  | -3.263591 | 0.084497  |
| H  | 2.516691  | -3.022478 | 1.160617  |
| C  | 2.967508  | 1.918252  | -2.799925 |
| H  | 2.628718  | 2.719605  | -2.110228 |
| C  | -3.823998 | -0.722124 | -0.468717 |
| C  | -6.016069 | -0.458225 | -2.231504 |
| C  | -4.726451 | -0.071683 | -2.636245 |
| H  | -4.565079 | 0.337674  | -3.645644 |
| C  | -3.630670 | -0.196901 | -1.769630 |
| C  | 0.984914  | -3.919817 | -0.055979 |
| H  | 0.801293  | -4.285045 | -1.088177 |
| H  | 0.913272  | -4.799516 | 0.614233  |
| H  | 0.173976  | -3.213609 | 0.216494  |
| C  | 3.502778  | -4.209965 | -0.362228 |
| H  | 4.502077  | -3.749760 | -0.219228 |
| H  | 3.473948  | -5.152391 | 0.221668  |
| H  | 3.398476  | -4.470207 | -1.436607 |
| H  | 2.362351  | 1.978753  | -3.724141 |

|   |           |           |           |
|---|-----------|-----------|-----------|
| H | 4.028427  | 2.120059  | -3.057052 |
| H | -6.869608 | -0.355426 | -2.918535 |
| C | -5.120615 | -1.110893 | -0.058181 |
| C | -6.204523 | -0.976640 | -0.939585 |
| H | -7.207942 | -1.283913 | -0.606824 |
| H | -5.301906 | -1.522083 | 0.944542  |
| C | -0.919765 | -1.585040 | 3.660509  |
| C | -1.502011 | -1.287851 | 2.418597  |
| C | -0.661158 | -0.846672 | 1.397924  |
| C | 0.732232  | -0.638433 | 1.438554  |
| C | 1.296529  | -0.939827 | 2.704800  |
| C | 0.479607  | -1.401518 | 3.772966  |
| C | -2.902819 | -1.321716 | 1.840692  |
| N | -2.729597 | -0.855265 | 0.429229  |
| C | -1.405106 | -0.598786 | 0.191998  |
| H | -1.505791 | -1.941978 | 4.520856  |
| H | -2.628056 | 0.109037  | -2.093516 |
| H | 2.375729  | -0.808478 | 2.889465  |
| H | 0.960879  | -1.622871 | 4.739160  |
| H | -3.605742 | -0.647921 | 2.376641  |
| O | -0.806393 | -0.215839 | -0.864363 |
| H | -3.339713 | -2.343763 | 1.847833  |
| H | 0.717745  | 1.197221  | 2.032923  |
| O | 0.903520  | 1.977663  | -0.158935 |
| C | 0.558694  | 2.662145  | 0.831089  |
| O | 0.501611  | 2.178322  | 2.056845  |
| C | 0.114293  | 4.111726  | 0.671757  |
| C | 0.647891  | 4.966663  | 1.843452  |
| C | -1.441108 | 4.067618  | 0.704333  |
| H | -1.842918 | 3.435543  | -0.114354 |
| H | -1.811738 | 3.676594  | 1.673094  |
| H | -1.835496 | 5.095634  | 0.571746  |
| H | 0.294409  | 4.586447  | 2.821348  |
| H | 0.291058  | 6.009668  | 1.726587  |
| H | 1.757020  | 4.985389  | 1.856791  |
| C | 0.602788  | 4.665431  | -0.679766 |
| H | 1.710951  | 4.682941  | -0.729453 |
| H | 0.226977  | 4.060091  | -1.527644 |
| H | 0.241113  | 5.705301  | -0.805555 |

68

I+PIVOH+ SCF Done: -1500.00804051 A.U.

|    |           |           |           |
|----|-----------|-----------|-----------|
| Ru | -1.297388 | 0.124177  | -0.394631 |
| C  | -2.571864 | 1.498775  | -1.541961 |
| C  | -3.196998 | 1.216712  | -0.280448 |
| C  | -3.388902 | -0.145325 | 0.137136  |
| C  | -2.979768 | -1.240092 | -0.689143 |
| C  | -2.485554 | -0.925304 | -2.020297 |
| C  | -2.306900 | 0.401951  | -2.452598 |
| H  | -3.459280 | 2.047520  | 0.392124  |
| H  | -3.770370 | -0.347625 | 1.148772  |

|   |           |           |           |
|---|-----------|-----------|-----------|
| H | -2.133678 | -1.751396 | -2.659131 |
| H | -1.834718 | 0.605231  | -3.425684 |
| C | -3.086096 | -2.691856 | -0.247245 |
| H | -2.272998 | -3.232240 | -0.781854 |
| C | -2.231041 | 2.911199  | -1.939623 |
| H | -2.103632 | 3.562367  | -1.052922 |
| C | 0.550048  | -0.224256 | 2.075496  |
| C | -1.178711 | 1.011841  | 3.929963  |
| C | -1.549227 | 0.854755  | 2.584242  |
| H | -2.530800 | 1.252848  | 2.288988  |
| C | -0.717780 | 0.249780  | 1.601589  |
| C | -2.863872 | -2.890887 | 1.260521  |
| H | -3.693348 | -2.463790 | 1.862585  |
| H | -2.819162 | -3.972313 | 1.498841  |
| H | -1.917266 | -2.418043 | 1.593985  |
| C | -4.440041 | -3.269196 | -0.714948 |
| H | -4.579462 | -3.158135 | -1.810121 |
| H | -4.507885 | -4.348740 | -0.469943 |
| H | -5.282597 | -2.750597 | -0.210641 |
| H | -3.045565 | 3.335928  | -2.564519 |
| H | -1.297745 | 2.940004  | -2.536131 |
| H | -1.863697 | 1.507820  | 4.634802  |
| C | 0.920360  | -0.081534 | 3.435739  |
| C | 0.068223  | 0.536429  | 4.358562  |
| H | 0.383910  | 0.642033  | 5.407444  |
| H | 1.886523  | -0.462067 | 3.793926  |
| C | 4.792877  | -2.259737 | 0.194149  |
| C | 3.490672  | -1.805974 | 0.431950  |
| C | 2.478055  | -2.006122 | -0.526533 |
| C | 2.721489  | -2.661174 | -1.745113 |
| C | 4.026869  | -3.120503 | -1.982099 |
| C | 5.047475  | -2.919655 | -1.025034 |
| C | 2.897723  | -1.093394 | 1.617059  |
| N | 1.500076  | -0.839098 | 1.208361  |
| C | 1.247816  | -1.385953 | -0.024133 |
| H | 5.597027  | -2.111143 | 0.931195  |
| H | -0.380596 | 2.193199  | 1.120186  |
| H | 4.262326  | -3.640843 | -2.923006 |
| H | 6.063729  | -3.286861 | -1.236660 |
| H | 3.407038  | -0.136353 | 1.860371  |
| O | 0.153217  | -1.354920 | -0.650131 |
| H | 2.928812  | -1.735503 | 2.524227  |
| H | 1.912438  | -2.800780 | -2.477320 |
| O | 0.431352  | 1.322575  | -0.861318 |
| C | 0.868193  | 2.343792  | -0.285377 |
| O | 0.299089  | 2.857159  | 0.789653  |
| C | 2.154170  | 3.008810  | -0.760292 |
| C | 3.288348  | 2.171424  | -0.099396 |
| C | 2.231221  | 4.476428  | -0.295386 |
| H | 1.401613  | 5.077673  | -0.719650 |

|   |          |          |           |
|---|----------|----------|-----------|
| H | 2.187945 | 4.561075 | 0.807748  |
| H | 3.185886 | 4.921291 | -0.640803 |
| H | 3.212288 | 2.202240 | 1.007405  |
| H | 4.271849 | 2.594729 | -0.388074 |
| H | 3.251934 | 1.114953 | -0.437038 |
| C | 2.249484 | 2.906522 | -2.296662 |
| H | 2.190263 | 1.854011 | -2.635949 |
| H | 1.433292 | 3.477023 | -2.785992 |
| H | 3.213609 | 3.333140 | -2.638275 |

65

IV' SCF Done: -1552.68316932 A.U.

|    |           |           |           |
|----|-----------|-----------|-----------|
| Ru | 0.453498  | -0.987335 | -0.143795 |
| C  | 1.604754  | -2.034884 | -1.684998 |
| C  | 0.231645  | -2.466478 | -1.795844 |
| C  | -0.472289 | -2.964174 | -0.664748 |
| C  | 0.138680  | -3.011210 | 0.634628  |
| C  | 1.538334  | -2.649105 | 0.728758  |
| C  | 2.265089  | -2.201529 | -0.412606 |
| H  | -0.307465 | -2.311598 | -2.743258 |
| H  | -1.551090 | -3.155284 | -0.760031 |
| H  | 2.025281  | -2.616163 | 1.716812  |
| H  | 3.304582  | -1.857884 | -0.294077 |
| C  | -0.626751 | -3.434753 | 1.877594  |
| H  | -0.071828 | -3.011942 | 2.743984  |
| C  | 2.339170  | -1.450171 | -2.859691 |
| H  | 3.100683  | -0.715181 | -2.532562 |
| C  | -4.104523 | 1.112512  | -0.503403 |
| C  | -6.526501 | -0.005765 | -1.430057 |
| C  | -5.508226 | -0.833143 | -0.924883 |
| H  | -5.655862 | -1.923552 | -0.881526 |
| C  | -4.302833 | -0.287715 | -0.458604 |
| C  | -2.064631 | -2.891293 | 1.928337  |
| H  | -2.707403 | -3.339368 | 1.141514  |
| H  | -2.530386 | -3.138450 | 2.903072  |
| H  | -2.082627 | -1.788940 | 1.805239  |
| C  | -0.585858 | -4.976494 | 1.984471  |
| H  | 0.454502  | -5.360699 | 1.987383  |
| H  | -1.076231 | -5.308648 | 2.922098  |
| H  | -1.122147 | -5.445510 | 1.132726  |
| H  | 1.645197  | -0.955297 | -3.566776 |
| H  | 2.862141  | -2.264181 | -3.407834 |
| H  | -7.470115 | -0.442320 | -1.790857 |
| C  | -5.128711 | 1.946560  | -1.005809 |
| C  | -6.330793 | 1.385004  | -1.463637 |
| H  | -7.119640 | 2.046485  | -1.853604 |
| H  | -4.995163 | 3.036799  | -1.052088 |
| C  | -0.759636 | 4.297994  | 1.598934  |
| C  | -1.427455 | 3.235910  | 0.987184  |
| C  | -0.748581 | 2.035740  | 0.702061  |
| C  | 0.619419  | 1.820697  | 1.009802  |

|   |           |           |           |
|---|-----------|-----------|-----------|
| C | 1.286201  | 2.908794  | 1.644831  |
| C | 0.605971  | 4.104518  | 1.921688  |
| C | -2.851291 | 3.085051  | 0.507750  |
| N | -2.902338 | 1.700837  | -0.015520 |
| C | -1.667950 | 1.112309  | 0.079768  |
| H | -1.264054 | 5.247163  | 1.832396  |
| H | -3.521725 | -0.941902 | -0.053140 |
| H | 2.344108  | 2.810145  | 1.928630  |
| H | 1.158460  | 4.919240  | 2.415190  |
| H | -3.086304 | 3.817245  | -0.295340 |
| O | -1.394695 | -0.065484 | -0.328751 |
| H | -3.605905 | 3.213707  | 1.313556  |
| N | 1.230309  | 0.613872  | 0.706076  |
| O | 2.952605  | -0.133240 | 2.072612  |
| C | 2.635240  | 0.456376  | 1.049928  |
| C | 3.615352  | 0.967114  | 0.045617  |
| C | 3.215355  | 1.639261  | -1.134160 |
| C | 4.990993  | 0.744562  | 0.292238  |
| H | 2.146831  | 1.811241  | -1.331838 |
| H | 5.281921  | 0.226934  | 1.219205  |
| C | 4.179934  | 2.077619  | -2.053560 |
| C | 5.950572  | 1.178858  | -0.632258 |
| H | 3.867042  | 2.602596  | -2.969313 |
| H | 7.019907  | 1.002207  | -0.438838 |
| C | 5.546446  | 1.845249  | -1.805699 |
| H | 6.301565  | 2.188257  | -2.530298 |

65

IV SCF Done: -1552.67540125 A.U.

|    |          |           |           |
|----|----------|-----------|-----------|
| Ru | 1.301075 | 0.187887  | 0.441137  |
| C  | 2.809101 | 1.072416  | 1.880891  |
| C  | 3.317210 | 0.951437  | 0.532198  |
| C  | 3.364429 | -0.304083 | -0.158690 |
| C  | 2.820594 | -1.495225 | 0.433483  |
| C  | 2.207424 | -1.357205 | 1.721170  |
| C  | 2.226513 | -0.101211 | 2.436201  |
| H  | 3.647135 | 1.861016  | 0.003971  |
| H  | 3.746708 | -0.331023 | -1.188772 |
| H  | 1.687328 | -2.218728 | 2.168013  |
| H  | 1.688327 | -0.030774 | 3.394649  |
| C  | 2.860360 | -2.836677 | -0.274580 |
| H  | 2.032908 | -3.446192 | 0.151611  |
| C  | 2.809269 | 2.398007  | 2.589560  |
| H  | 2.052231 | 2.429549  | 3.396604  |
| C  | 0.203839 | 2.060810  | -0.501393 |
| C  | 2.260854 | 2.820490  | -2.319698 |
| C  | 1.750297 | 1.535926  | -2.397404 |
| H  | 2.085618 | 0.815424  | -3.157959 |
| C  | 0.727470 | 1.103708  | -1.485916 |
| C  | 2.653952 | -2.739578 | -1.795298 |
| H  | 3.529020 | -2.276058 | -2.297995 |



|   |           |           |           |
|---|-----------|-----------|-----------|
| H | 2.538596  | -3.754413 | -2.224803 |
| H | 1.751410  | -2.143620 | -2.040893 |
| C | 4.192937  | -3.534735 | 0.088537  |
| H | 4.314425  | -3.651852 | 1.184750  |
| H | 4.228845  | -4.542611 | -0.372335 |
| H | 5.058763  | -2.954384 | -0.293947 |
| H | 2.607473  | 3.223209  | 1.876564  |
| H | 3.805780  | 2.583836  | 3.044378  |
| H | 3.026641  | 3.150677  | -3.038730 |
| C | 0.775749  | 3.376849  | -0.454421 |
| C | 1.795276  | 3.734694  | -1.323126 |
| H | 2.224118  | 4.747415  | -1.274080 |
| H | 0.359895  | 4.102047  | 0.262054  |
| C | -4.824628 | 1.927331  | 0.015932  |
| C | -3.437451 | 1.789871  | 0.139513  |
| C | -2.898274 | 0.771253  | 0.959685  |
| C | -3.705570 | -0.146629 | 1.650922  |
| C | -5.094724 | -0.007240 | 1.519617  |
| C | -5.643231 | 1.019155  | 0.716551  |
| C | -2.313144 | 2.541487  | -0.531065 |
| N | -1.115094 | 1.888588  | 0.038100  |
| C | -1.446497 | 0.845189  | 0.846301  |
| H | -5.268631 | 2.708367  | -0.619949 |
| H | -3.253177 | -0.950882 | 2.249177  |
| H | -5.767303 | -0.706510 | 2.038991  |
| H | -6.737494 | 1.104286  | 0.627177  |
| H | -2.312068 | 3.632388  | -0.319826 |
| O | -0.574706 | 0.071625  | 1.352350  |
| H | -2.313375 | 2.373888  | -1.630790 |
| N | 0.281853  | -0.205743 | -1.390173 |
| C | -1.056534 | -0.497223 | -1.683362 |
| O | -1.696890 | 0.240772  | -2.446148 |
| C | -1.661776 | -1.724522 | -1.077702 |
| C | -0.939739 | -2.634892 | -0.277214 |
| C | -3.045084 | -1.928590 | -1.280951 |
| C | -1.587828 | -3.730488 | 0.311643  |
| C | -3.694355 | -3.020156 | -0.687665 |
| C | -2.967771 | -3.923432 | 0.110718  |
| H | 0.133050  | -2.473979 | -0.115107 |
| H | -3.593011 | -1.204685 | -1.902548 |
| H | -1.016806 | -4.440857 | 0.930197  |
| H | -4.773474 | -3.169322 | -0.847280 |
| H | -3.476780 | -4.782731 | 0.575128  |

51

I' SCF Done: -1153.14432434 A.U.

|    |          |           |           |
|----|----------|-----------|-----------|
| Ru | 1.287725 | -0.498884 | -0.479102 |
| C  | 2.452490 | -2.454352 | -0.942861 |
| C  | 2.043850 | -2.498407 | 0.410406  |
| C  | 2.212301 | -1.344928 | 1.253597  |
| C  | 2.955030 | -0.173626 | 0.827399  |

|   |           |           |           |
|---|-----------|-----------|-----------|
| C | 3.431082  | -0.162219 | -0.531700 |
| C | 3.098021  | -1.237650 | -1.411333 |
| H | 1.464287  | -3.357617 | 0.780702  |
| H | 1.754868  | -1.350983 | 2.254777  |
| H | 3.940101  | 0.730192  | -0.927049 |
| H | 3.344814  | -1.146684 | -2.481993 |
| C | 3.222060  | 0.999165  | 1.755782  |
| H | 3.397985  | 1.881232  | 1.101098  |
| C | 2.171811  | -3.574641 | -1.906288 |
| H | 1.835152  | -3.186680 | -2.889058 |
| C | -3.843771 | -0.210011 | 0.213164  |
| C | -6.035819 | -1.873505 | 0.840273  |
| C | -4.743381 | -2.414844 | 0.722012  |
| H | -4.581652 | -3.493405 | 0.872457  |
| C | -3.647138 | -1.598957 | 0.409094  |
| C | 2.049498  | 1.336582  | 2.690672  |
| H | 1.870062  | 0.537450  | 3.440036  |
| H | 2.274807  | 2.262249  | 3.256858  |
| H | 1.113081  | 1.500811  | 2.119164  |
| C | 4.521393  | 0.708378  | 2.540989  |
| H | 5.376806  | 0.509379  | 1.863690  |
| H | 4.784211  | 1.575429  | 3.180533  |
| H | 4.394711  | -0.175187 | 3.201631  |
| H | 1.404442  | -4.270802 | -1.517613 |
| H | 3.104589  | -4.152655 | -2.085215 |
| H | -6.890350 | -2.522756 | 1.083941  |
| C | -5.143333 | 0.337642  | 0.329892  |
| C | -6.227663 | -0.495718 | 0.641959  |
| H | -7.233687 | -0.057827 | 0.730459  |
| H | -5.326975 | 1.410805  | 0.182951  |
| C | -0.934563 | 3.832544  | -0.984127 |
| C | -1.523495 | 2.599771  | -0.666028 |
| C | -0.680551 | 1.494284  | -0.563366 |
| C | 0.714722  | 1.440593  | -0.747252 |
| C | 1.287423  | 2.696608  | -1.067852 |
| C | 0.470764  | 3.849402  | -1.182990 |
| C | -2.924186 | 2.105438  | -0.371418 |
| N | -2.747199 | 0.640504  | -0.100598 |
| C | -1.427930 | 0.313999  | -0.214420 |
| H | -1.518499 | 4.760829  | -1.078526 |
| H | -2.642554 | -2.029421 | 0.315204  |
| H | 2.370250  | 2.798778  | -1.247164 |
| H | 0.948753  | 4.808323  | -1.439760 |
| H | -3.619894 | 2.242785  | -1.226851 |
| O | -0.826661 | -0.807005 | -0.062246 |
| H | -3.373193 | 2.595842  | 0.518758  |

51

I SCF Done: -1153.16853219 A.U.

|    |          |           |          |
|----|----------|-----------|----------|
| Ru | 1.067363 | -0.277947 | 0.436944 |
| C  | 2.311999 | -1.080611 | 2.031735 |

|   |           |           |           |
|---|-----------|-----------|-----------|
| C | 3.022282  | 0.007173  | 1.393737  |
| C | 3.194989  | 0.023367  | -0.014254 |
| C | 2.641555  | -1.034452 | -0.829697 |
| C | 2.130877  | -2.216099 | -0.160599 |
| C | 1.975822  | -2.242667 | 1.236979  |
| H | 3.335159  | 0.872705  | 1.998849  |
| H | 3.642921  | 0.903143  | -0.499013 |
| H | 1.727137  | -3.039767 | -0.770629 |
| H | 1.450432  | -3.084521 | 1.713978  |
| C | 2.711960  | -0.994123 | -2.348298 |
| H | 1.881648  | -1.638041 | -2.715391 |
| C | 2.029526  | -1.050720 | 3.509697  |
| H | 1.118124  | -1.627990 | 3.759919  |
| C | -0.973934 | 1.995201  | 0.034734  |
| C | 0.956370  | 4.057741  | 0.202066  |
| C | 1.326556  | 2.719783  | 0.329860  |
| H | 2.390475  | 2.505444  | 0.500791  |
| C | 0.405650  | 1.627573  | 0.254996  |
| C | 2.520234  | 0.412462  | -2.939509 |
| H | 3.380710  | 1.076998  | -2.714450 |
| H | 2.442150  | 0.352347  | -4.043273 |
| H | 1.601058  | 0.896150  | -2.548902 |
| C | 4.048450  | -1.630079 | -2.796714 |
| H | 4.166349  | -2.661788 | -2.406910 |
| H | 4.099175  | -1.673694 | -3.903694 |
| H | 4.910295  | -1.028470 | -2.438770 |
| H | 1.906452  | -0.013559 | 3.877799  |
| H | 2.882562  | -1.507877 | 4.058196  |
| H | 1.712886  | 4.854273  | 0.272683  |
| C | -1.349081 | 3.360786  | -0.102643 |
| C | -0.398830 | 4.377596  | -0.020251 |
| H | -0.715884 | 5.426186  | -0.128733 |
| H | -2.395458 | 3.643718  | -0.275516 |
| C | -5.519627 | -0.182824 | -0.459430 |
| C | -4.161455 | 0.107318  | -0.292586 |
| C | -3.226033 | -0.929038 | -0.104364 |
| C | -3.605221 | -2.281972 | -0.075050 |
| C | -4.968148 | -2.573217 | -0.242089 |
| C | -5.910445 | -1.536856 | -0.431492 |
| C | -3.433810 | 1.424311  | -0.272329 |
| N | -2.015735 | 1.042045  | -0.055950 |
| C | -1.904040 | -0.320703 | 0.039240  |
| H | -6.264415 | 0.614056  | -0.607732 |
| H | -2.855311 | -3.072875 | 0.073805  |
| H | -5.310388 | -3.619132 | -0.225741 |
| H | -6.973562 | -1.792866 | -0.559906 |
| H | -3.778632 | 2.086468  | 0.550588  |
| O | -0.828117 | -0.969319 | 0.220638  |
| H | -3.536638 | 1.979308  | -1.229406 |

MONOMER SCF Done: -1404.57394019 A.U.

|    |           |           |           |
|----|-----------|-----------|-----------|
| Ru | 0.535309  | 0.232375  | 0.025854  |
| C  | 1.164920  | -1.745956 | -0.567004 |
| C  | 0.282635  | -1.206051 | -1.585397 |
| C  | -1.012135 | -0.712324 | -1.255028 |
| C  | -1.432695 | -0.652137 | 0.119296  |
| C  | -0.586153 | -1.271134 | 1.123513  |
| C  | 0.669152  | -1.848476 | 0.780215  |
| H  | 0.660508  | -1.081501 | -2.612703 |
| H  | -1.597422 | -0.197576 | -2.029874 |
| H  | -0.873622 | -1.199204 | 2.184882  |
| H  | 1.343210  | -2.191902 | 1.579640  |
| C  | -2.730957 | 0.015044  | 0.548891  |
| H  | -2.542173 | 0.421628  | 1.567900  |
| C  | 2.565008  | -2.178609 | -0.914736 |
| H  | 3.243401  | -2.067811 | -0.046910 |
| C  | -3.157675 | 1.183319  | -0.352979 |
| H  | -3.493524 | 0.829337  | -1.350922 |
| H  | -4.012961 | 1.721533  | 0.103463  |
| H  | -2.324926 | 1.901245  | -0.501304 |
| C  | -3.833657 | -1.062832 | 0.658349  |
| H  | -3.545041 | -1.881515 | 1.349635  |
| H  | -4.776531 | -0.613464 | 1.032638  |
| H  | -4.040834 | -1.513044 | -0.335628 |
| H  | 2.970492  | -1.577808 | -1.752472 |
| H  | 2.564139  | -3.246572 | -1.225253 |
| Cl | 0.481669  | 2.269338  | -1.075324 |
| Cl | 1.947804  | 1.104020  | 1.638184  |

17

PIVOH SCF Done: -346.787566485 A.U.

|   |           |           |           |
|---|-----------|-----------|-----------|
| O | -1.530623 | -1.256227 | -0.000030 |
| C | -0.947464 | -0.187198 | -0.000027 |
| O | -1.615291 | 1.003248  | -0.000003 |
| C | 0.576856  | 0.009957  | -0.000006 |
| C | 0.973184  | 0.807183  | -1.266877 |
| C | 1.253057  | -1.371923 | -0.000015 |
| H | 0.960715  | -1.960006 | 0.892844  |
| H | 0.960729  | -1.959981 | -0.892895 |
| H | 2.356455  | -1.254594 | -0.000010 |
| H | 0.684700  | 0.262293  | -2.189898 |
| H | 2.073279  | 0.955349  | -1.288240 |
| H | 0.485516  | 1.802005  | -1.284166 |
| C | 0.973120  | 0.807107  | 1.266939  |
| H | 0.485440  | 1.801919  | 1.284267  |
| H | 0.684610  | 0.262144  | 2.189906  |
| H | 2.073217  | 0.955273  | 1.288335  |
| H | -2.569864 | 0.768678  | 0.000038  |

16

PIVO- SCF Done: -346.216168558 A.U.

|   |           |           |          |
|---|-----------|-----------|----------|
| O | -1.599911 | -1.119725 | 0.000105 |
|---|-----------|-----------|----------|

|   |           |           |           |
|---|-----------|-----------|-----------|
| C | -1.075539 | 0.029258  | 0.000250  |
| O | -1.620001 | 1.164929  | 0.000235  |
| C | 0.542771  | 0.014612  | 0.000081  |
| C | 1.105637  | 1.441348  | 0.000703  |
| C | 0.999586  | -0.751209 | -1.254607 |
| H | 0.485909  | -1.735144 | -1.277393 |
| H | 0.716129  | -0.200872 | -2.179652 |
| H | 2.106092  | -0.910503 | -1.278350 |
| H | 0.738841  | 2.000065  | -0.885298 |
| H | 2.223908  | 1.452076  | -0.000201 |
| H | 0.740674  | 1.998764  | 0.888314  |
| C | 1.000354  | -0.752881 | 1.253425  |
| H | 0.717680  | -0.203684 | 2.179391  |
| H | 0.486376  | -1.736666 | 1.275242  |
| H | 2.106837  | -0.912437 | 1.276118  |

41

PROD5 SCF Done: -1069.15859865 A.U.

|   |           |           |           |
|---|-----------|-----------|-----------|
| C | 3.958711  | -0.101005 | 0.141305  |
| C | 6.612538  | -1.043589 | 0.514426  |
| C | 5.542175  | -1.945396 | 0.379423  |
| H | 5.728179  | -3.030673 | 0.417310  |
| C | 4.227659  | -1.493625 | 0.194462  |
| H | 7.640406  | -1.410695 | 0.658652  |
| C | 5.039619  | 0.807331  | 0.278049  |
| C | 6.348502  | 0.334503  | 0.461959  |
| H | 7.170182  | 1.061020  | 0.565474  |
| H | 4.873614  | 1.892979  | 0.244043  |
| C | 0.050593  | 3.031228  | -0.511933 |
| C | 0.884007  | 1.922323  | -0.336053 |
| C | 0.367704  | 0.619510  | -0.348621 |
| C | -1.012749 | 0.346509  | -0.527578 |
| C | -1.850502 | 1.470930  | -0.747665 |
| C | -1.320380 | 2.773209  | -0.728476 |
| C | 2.374956  | 1.838244  | -0.119498 |
| N | 2.647073  | 0.395879  | -0.042050 |
| C | 1.466917  | -0.356189 | -0.188561 |
| H | 0.440406  | 4.060391  | -0.500887 |
| H | 3.398231  | -2.202358 | 0.088145  |
| H | -2.920871 | 1.328777  | -0.943556 |
| H | -2.006963 | 3.617447  | -0.900134 |
| H | 2.685406  | 2.352666  | 0.818185  |
| O | 1.363359  | -1.588861 | -0.202919 |
| H | 2.942544  | 2.302617  | -0.957329 |
| N | -1.415852 | -0.988787 | -0.518158 |
| O | -2.801424 | -2.740105 | -0.956075 |
| C | -2.678134 | -1.592849 | -0.534297 |
| C | -3.846982 | -0.847949 | 0.051772  |
| C | -3.729654 | -0.088722 | 1.237033  |
| C | -5.114912 | -1.020955 | -0.542164 |
| H | -2.744628 | 0.028039  | 1.714805  |

|   |           |           |           |
|---|-----------|-----------|-----------|
| H | -5.194121 | -1.649212 | -1.442710 |
| C | -4.865744 | 0.506945  | 1.806861  |
| C | -6.245436 | -0.404590 | 0.016024  |
| H | -4.770953 | 1.088003  | 2.737799  |
| H | -7.230456 | -0.529054 | -0.460966 |
| C | -6.122560 | 0.360103  | 1.191312  |
| H | -7.011630 | 0.836213  | 1.634652  |
| H | -0.631345 | -1.659874 | -0.606782 |

41

PROD6 SCF Done: -1069.15979529 A.U.

|   |           |           |           |
|---|-----------|-----------|-----------|
| C | -2.446950 | 0.584852  | -0.208588 |
| C | -4.988593 | -0.592209 | 0.100234  |
| C | -3.841022 | -1.403206 | 0.062125  |
| H | -3.910202 | -2.496638 | 0.162441  |
| C | -2.570256 | -0.827406 | -0.080201 |
| H | -5.981687 | -1.052926 | 0.218181  |
| C | -3.598768 | 1.390557  | -0.160304 |
| C | -4.865357 | 0.804250  | -0.001793 |
| H | -5.761838 | 1.442965  | 0.030744  |
| H | -3.492272 | 2.481375  | -0.264238 |
| C | 1.966051  | 2.639133  | 1.034518  |
| C | 0.882484  | 2.048050  | 0.371888  |
| C | 1.086905  | 1.329106  | -0.819557 |
| C | 2.360234  | 1.163248  | -1.379977 |
| C | 3.448846  | 1.748022  | -0.713162 |
| C | 3.250948  | 2.479809  | 0.478649  |
| C | -0.577209 | 1.976472  | 0.748887  |
| N | -1.156839 | 1.165901  | -0.333763 |
| C | -0.202154 | 0.740918  | -1.268679 |
| H | 1.825420  | 3.199575  | 1.972434  |
| H | 2.481893  | 0.567112  | -2.296816 |
| H | 4.467703  | 1.628149  | -1.113348 |
| H | 4.119342  | 2.926021  | 0.989085  |
| H | -1.055849 | 2.979957  | 0.810433  |
| O | -0.409557 | -0.021085 | -2.214964 |
| H | -0.726788 | 1.449838  | 1.718320  |
| N | -1.384710 | -1.628884 | -0.097521 |
| C | -0.442283 | -1.410141 | 0.905866  |
| O | -0.750476 | -0.922990 | 1.997281  |
| C | 0.991569  | -1.719254 | 0.550556  |
| C | 1.388820  | -2.422572 | -0.607249 |
| C | 1.981048  | -1.173378 | 1.397472  |
| C | 2.751291  | -2.563038 | -0.917398 |
| C | 3.339750  | -1.304907 | 1.082271  |
| C | 3.728475  | -1.999705 | -0.077935 |
| H | 0.640199  | -2.872153 | -1.277479 |
| H | 1.647170  | -0.622567 | 2.289318  |
| H | 3.050909  | -3.113858 | -1.822858 |
| H | 4.100651  | -0.853709 | 1.737947  |
| H | 4.796021  | -2.100271 | -0.330833 |

H -0.992535 -1.700990 -1.048626  
8  
SbF6Ag SCF Done: -751.209300257 A.U.  
Sb 0.581961 0.846604 -0.000000  
F 0.464541 -0.657912 1.307929  
F 0.464541 2.114004 1.412514  
F 0.464541 2.114004 -1.412514  
F 0.464541 -0.657912 -1.307929  
F 2.479832 0.729998 -0.000000  
F -1.402631 0.626190 -0.000000  
Ag -1.193580 -1.736003 0.000000

8  
SbF6H SCF Done: -604.669835176 A.U.  
Sb 0.159465 0.084693 -0.000000  
F -0.108962 -1.861468 -0.000000  
F -0.108962 -0.008222 1.881482  
F -0.354010 1.913043 0.000000  
F -0.108962 -0.008222 -1.881482  
F 2.044837 0.164712 -0.000000  
F -2.074094 -0.520085 0.000000  
H -1.741338 -1.437163 0.000000

7  
SbF6- SCF Done: -604.218524309 A.U.  
Sb 0.000000 0.000000 0.000000  
F -0.000000 -0.000000 1.932778  
F -0.000000 1.932778 -0.000000  
F -0.000000 -0.000000 -1.932778  
F -0.000000 -1.932778 0.000000  
F 1.932778 -0.000000 0.000000  
F -1.932778 -0.000000 -0.000000

26  
SUBST0del5- SCF Done: -669.024614426 A.U.  
C -1.700513 -0.088686 0.000067  
C -4.564177 -0.201855 -0.000290  
C -3.885152 1.032812 -0.000699  
H -4.460407 1.974527 -0.001180  
C -2.486565 1.103567 -0.000530  
H -5.665494 -0.242949 -0.000433  
C -2.396699 -1.334260 0.000519  
C -3.799687 -1.380803 0.000329  
H -4.300034 -2.364366 0.000687  
H -1.837573 -2.280329 0.001048  
C 3.084302 -1.563527 -0.000373  
C 1.906189 -0.811960 -0.000060  
C 1.959544 0.607296 0.000191  
C 3.133825 1.419831 0.000198  
C 4.295476 0.580668 -0.000155  
C 4.296938 -0.834763 -0.000425  
C 0.479930 -1.296205 0.000094  
N -0.308319 -0.060797 0.000170

|   |           |           |           |
|---|-----------|-----------|-----------|
| C | 0.554878  | 1.109705  | 0.000386  |
| H | 3.072087  | -2.668274 | -0.000533 |
| H | 5.306352  | 1.052974  | -0.000268 |
| H | 5.255308  | -1.393779 | -0.000656 |
| H | 0.239286  | -1.918426 | 0.896895  |
| O | 0.124467  | 2.258761  | 0.000625  |
| H | 0.238909  | -1.918569 | -0.896491 |
| H | -1.955669 | 2.063762  | -0.000762 |

26

SUBST0del6- SCF Done: -669.032051193 A.U.

|   |           |           |           |
|---|-----------|-----------|-----------|
| C | -1.785798 | -0.105404 | -0.103121 |
| C | -4.537513 | -0.303339 | 0.218476  |
| C | -3.693856 | -1.427973 | 0.381655  |
| H | -4.193184 | -2.386542 | 0.652109  |
| C | -2.285820 | -1.394694 | 0.236111  |
| H | -5.634334 | -0.392473 | 0.349763  |
| C | -2.579921 | 1.056980  | -0.274426 |
| C | -3.971850 | 0.944611  | -0.107587 |
| H | -4.611670 | 1.836155  | -0.233348 |
| H | -2.112075 | 2.024278  | -0.513635 |
| C | 3.010370  | -1.591610 | -0.135146 |
| C | 1.817346  | -0.850022 | -0.156402 |
| C | 1.856192  | 0.550981  | 0.015936  |
| C | 3.058662  | 1.235168  | 0.240173  |
| C | 4.253004  | 0.490193  | 0.277213  |
| C | 4.225312  | -0.911805 | 0.087013  |
| C | 0.394719  | -1.261521 | -0.362388 |
| N | -0.355021 | -0.005830 | -0.263495 |
| C | 0.466978  | 1.100835  | -0.064872 |
| H | 2.998547  | -2.685153 | -0.280653 |
| H | 3.040611  | 2.329310  | 0.373723  |
| H | 5.217132  | 0.996869  | 0.451158  |
| H | 5.169696  | -1.481387 | 0.115138  |
| H | -0.112589 | -1.969475 | 0.358063  |
| O | 0.139798  | 2.289862  | 0.051462  |
| H | 0.237685  | -1.744076 | -1.355369 |

27

SUBST0 SCF Done: -669.663592848 A.U.

|   |           |           |           |
|---|-----------|-----------|-----------|
| C | -1.749340 | -0.091603 | -0.000168 |
| C | -4.590645 | -0.180276 | 0.000251  |
| C | -3.909743 | 1.050096  | 0.000313  |
| H | -4.478327 | 1.993924  | 0.000545  |
| C | -2.508802 | 1.108122  | 0.000118  |
| H | -5.691173 | -0.212681 | 0.000393  |
| C | -2.438800 | -1.331918 | -0.000237 |
| C | -3.842116 | -1.368279 | -0.000027 |
| H | -4.351959 | -2.344977 | -0.000088 |
| H | -1.889728 | -2.283699 | -0.000464 |
| C | 3.070005  | -1.586562 | 0.000124  |
| C | 1.874533  | -0.856344 | 0.000036  |



|   |           |           |           |
|---|-----------|-----------|-----------|
| C | 1.894702  | 0.546160  | -0.000029 |
| C | 3.095355  | 1.270495  | 0.000028  |
| C | 4.297992  | 0.543450  | 0.000146  |
| C | 4.283153  | -0.869188 | 0.000187  |
| C | 0.440606  | -1.321046 | -0.000045 |
| N | -0.336004 | -0.075035 | -0.000338 |
| C | 0.499591  | 1.068372  | -0.000198 |
| H | 3.069047  | -2.688339 | 0.000142  |
| H | 3.071626  | 2.371205  | -0.000026 |
| H | 5.262493  | 1.075225  | 0.000195  |
| H | 5.237203  | -1.419931 | 0.000264  |
| H | 0.204980  | -1.938041 | 0.897173  |
| O | 0.149590  | 2.244020  | -0.000233 |
| H | 0.205176  | -1.938456 | -0.897009 |
| H | -1.982968 | 2.069982  | 0.000121  |

17

SUBST SCF Done: -587.852479551 A.U.

|   |           |           |           |
|---|-----------|-----------|-----------|
| N | -1.283312 | 1.411323  | 0.000383  |
| C | -0.645715 | 0.272068  | 0.000510  |
| O | -1.469046 | -0.819218 | 0.000110  |
| C | -2.774646 | -0.315857 | -0.000200 |
| O | -2.651941 | 1.052895  | 0.000016  |
| O | -3.781624 | -0.958660 | -0.000466 |
| C | 0.805219  | 0.087908  | 0.000257  |
| C | 1.658531  | 1.217882  | -0.000169 |
| C | 1.354474  | -1.214559 | 0.000170  |
| C | 3.047219  | 1.037890  | -0.000383 |
| C | 2.747796  | -1.382278 | 0.000071  |
| C | 3.594981  | -0.260166 | -0.000112 |
| H | 1.219202  | 2.226846  | -0.000444 |
| H | 0.684715  | -2.087249 | 0.000348  |
| H | 3.710651  | 1.916653  | -0.000651 |
| H | 3.174377  | -2.397307 | -0.000043 |
| H | 4.687977  | -0.395674 | -0.000044 |

## 12. NMR Spectra.

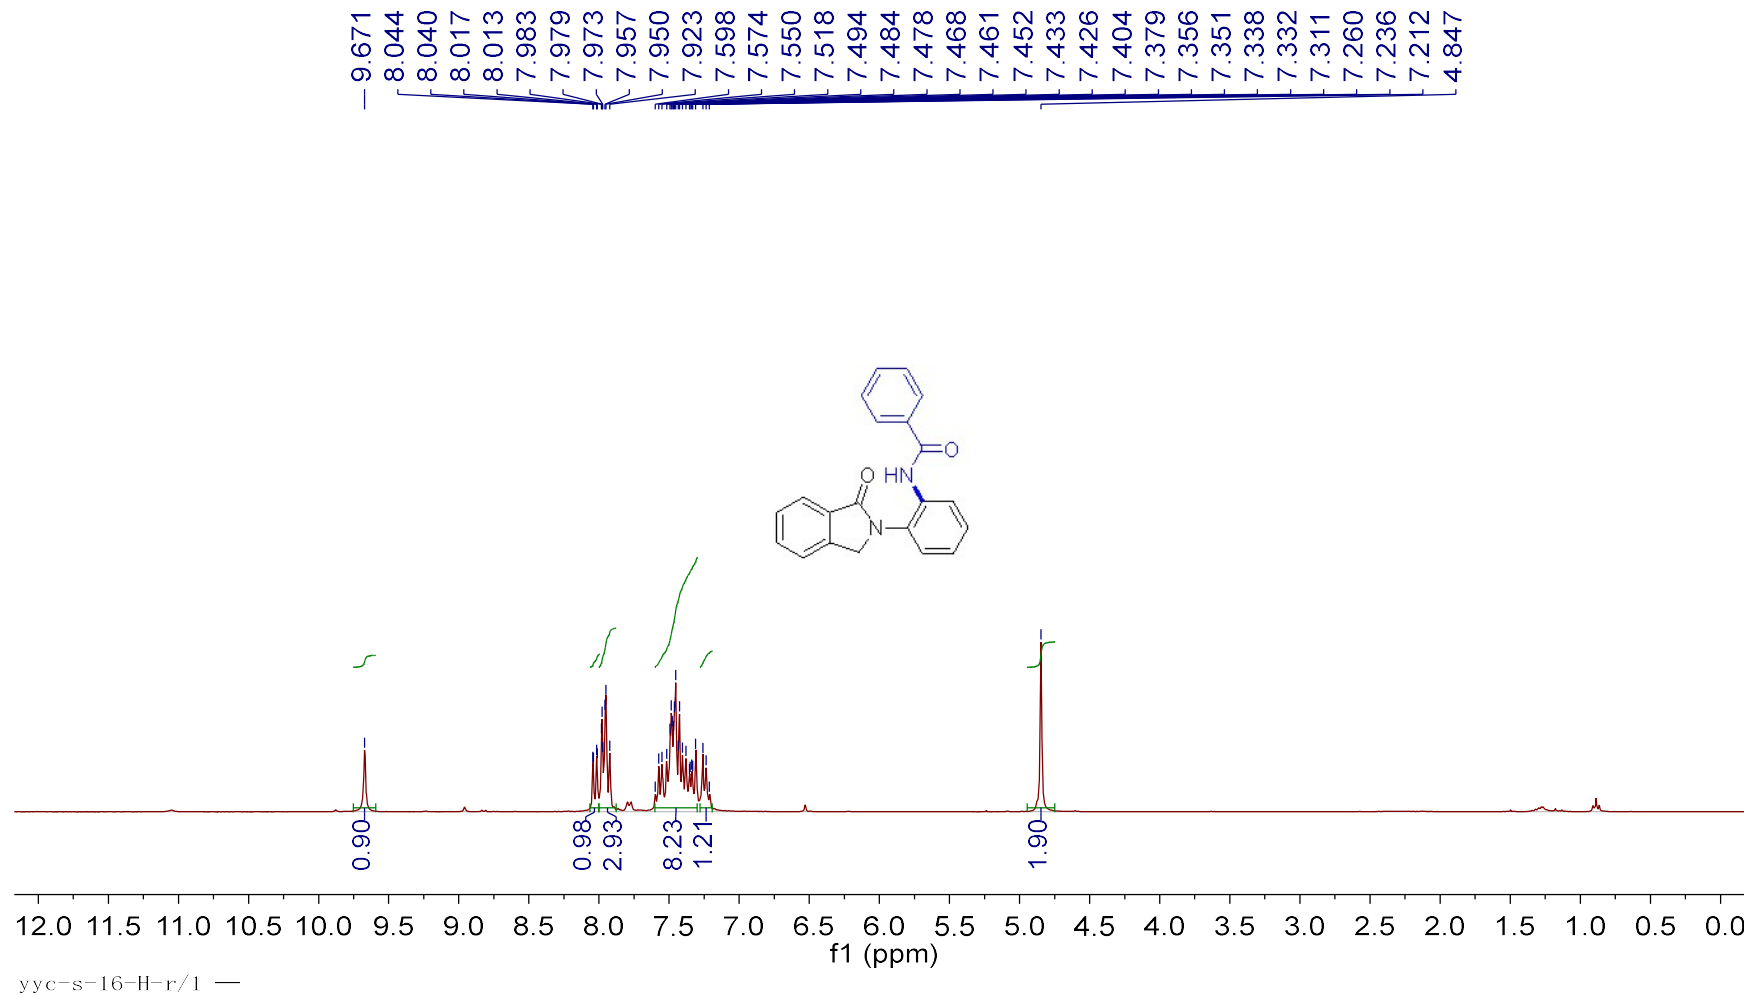

<sup>1</sup>H NMR spectrum of **3a**.

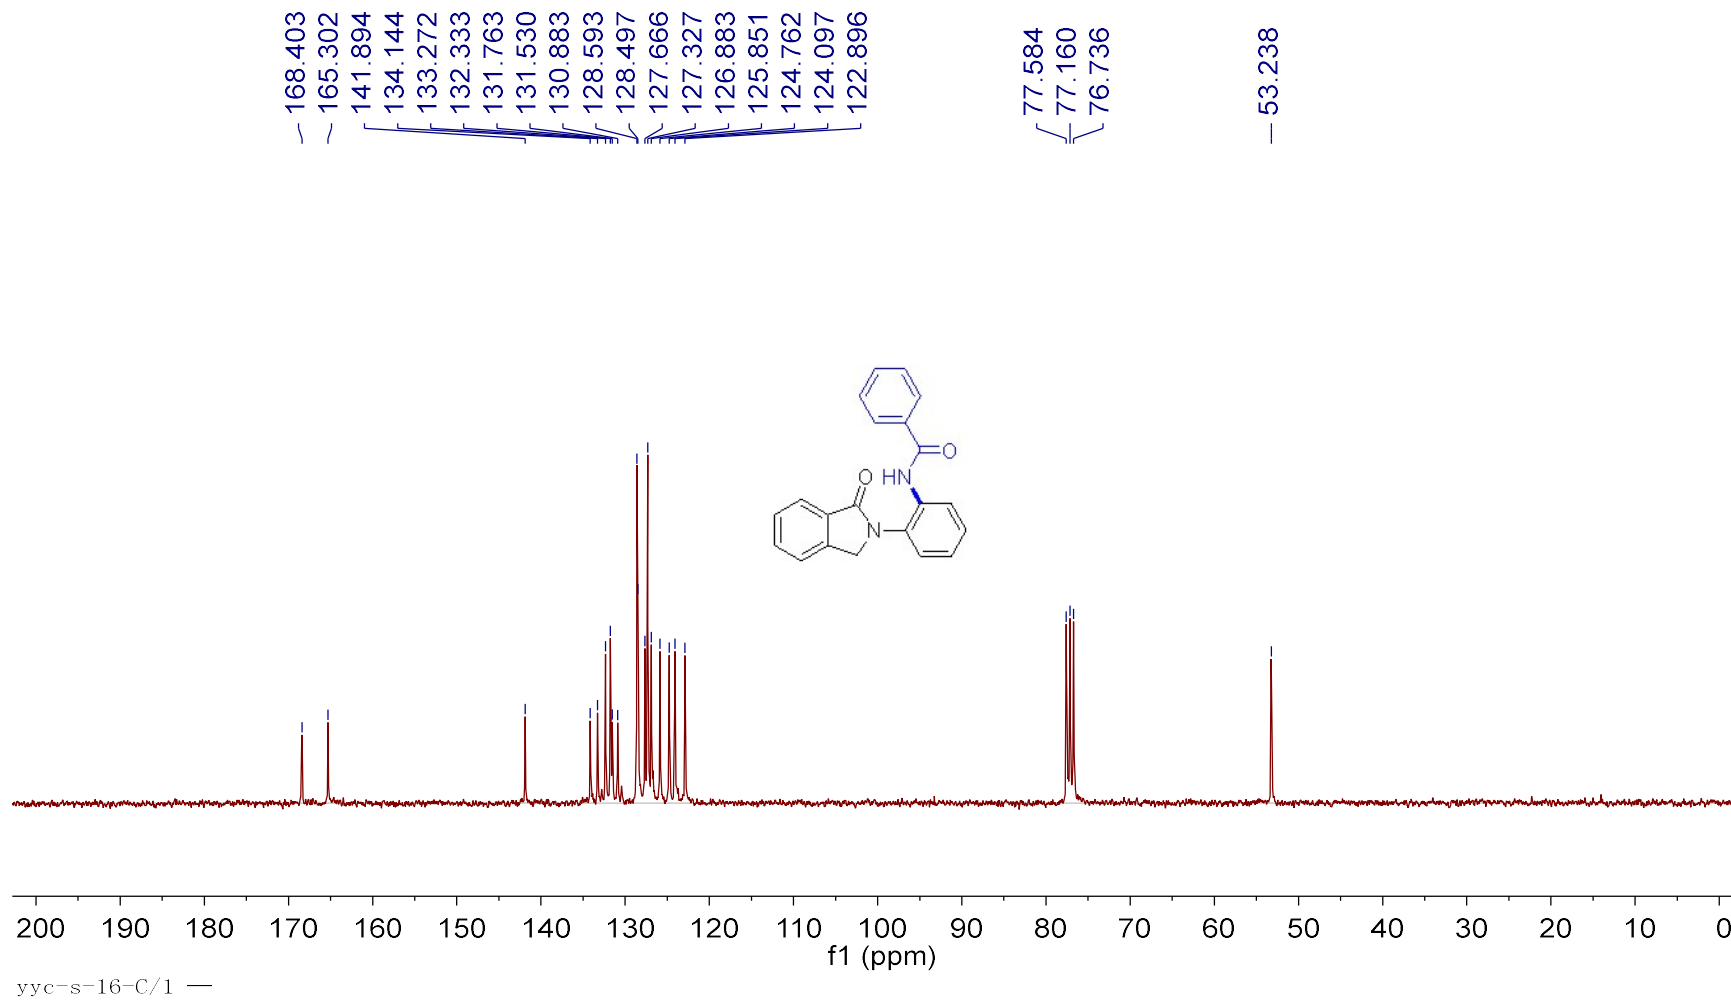

$^{13}\text{C}\{^1\text{H}\}$  NMR spectrum of **3a**.

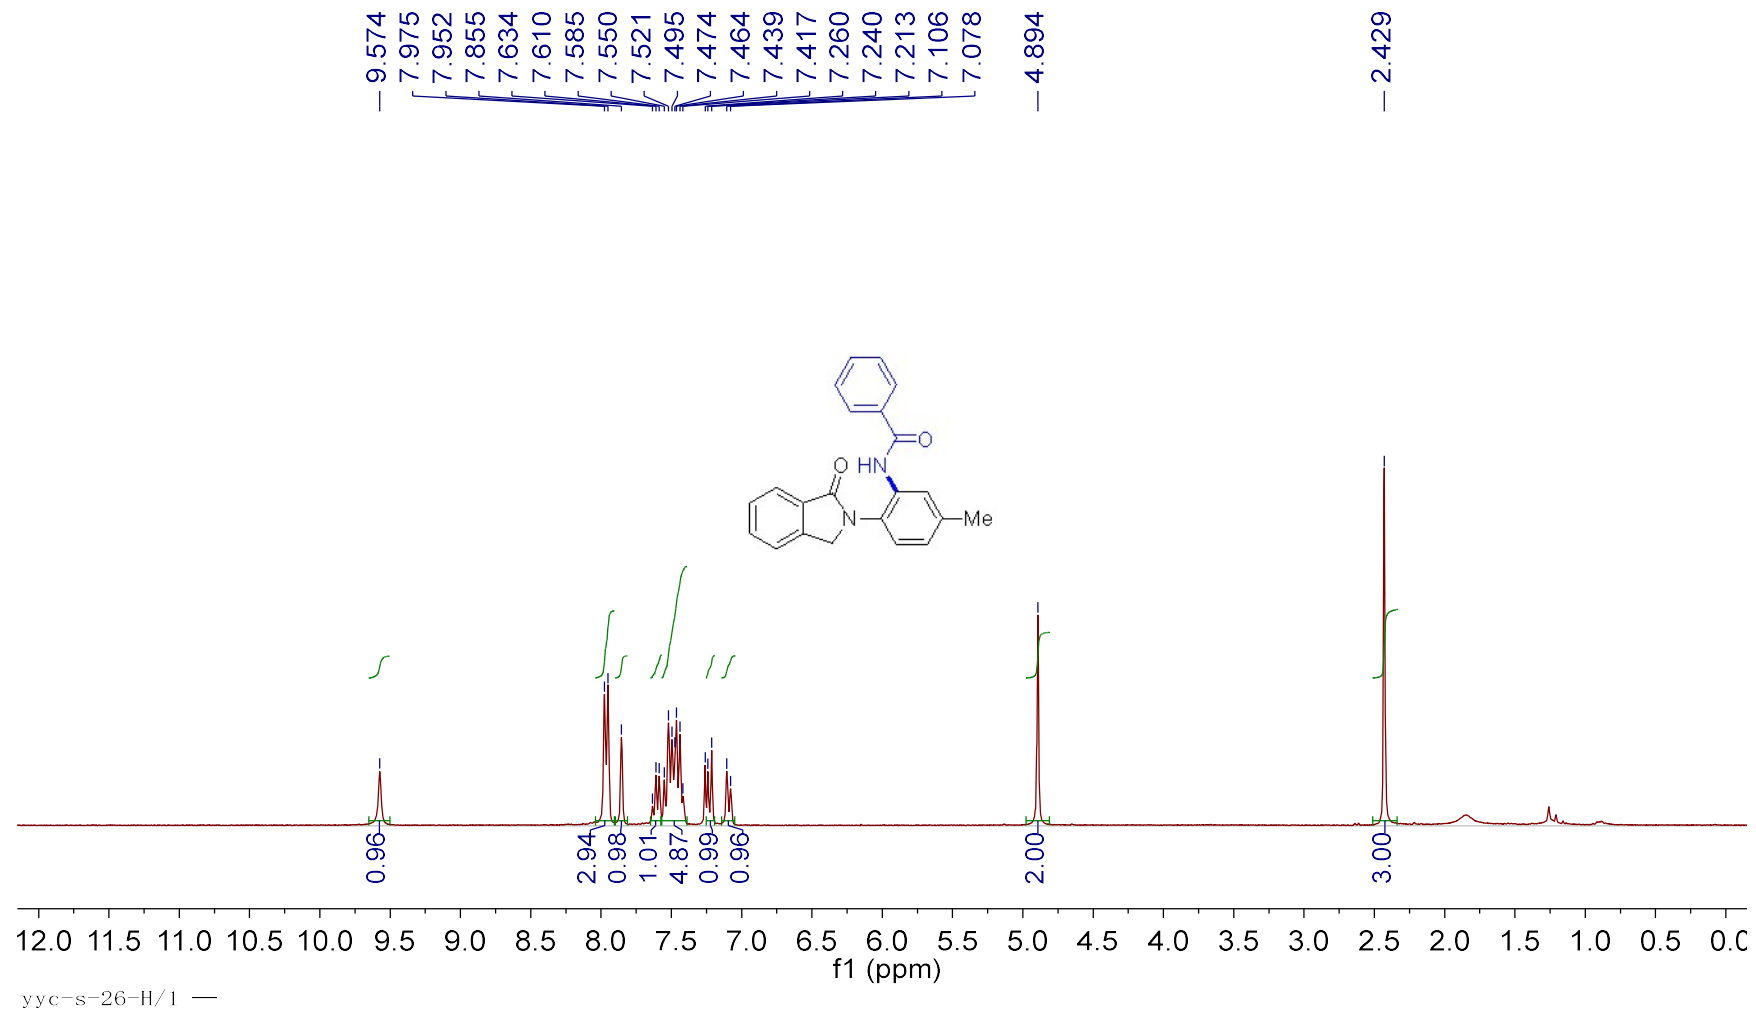

<sup>1</sup>H NMR spectrum of **3b**.

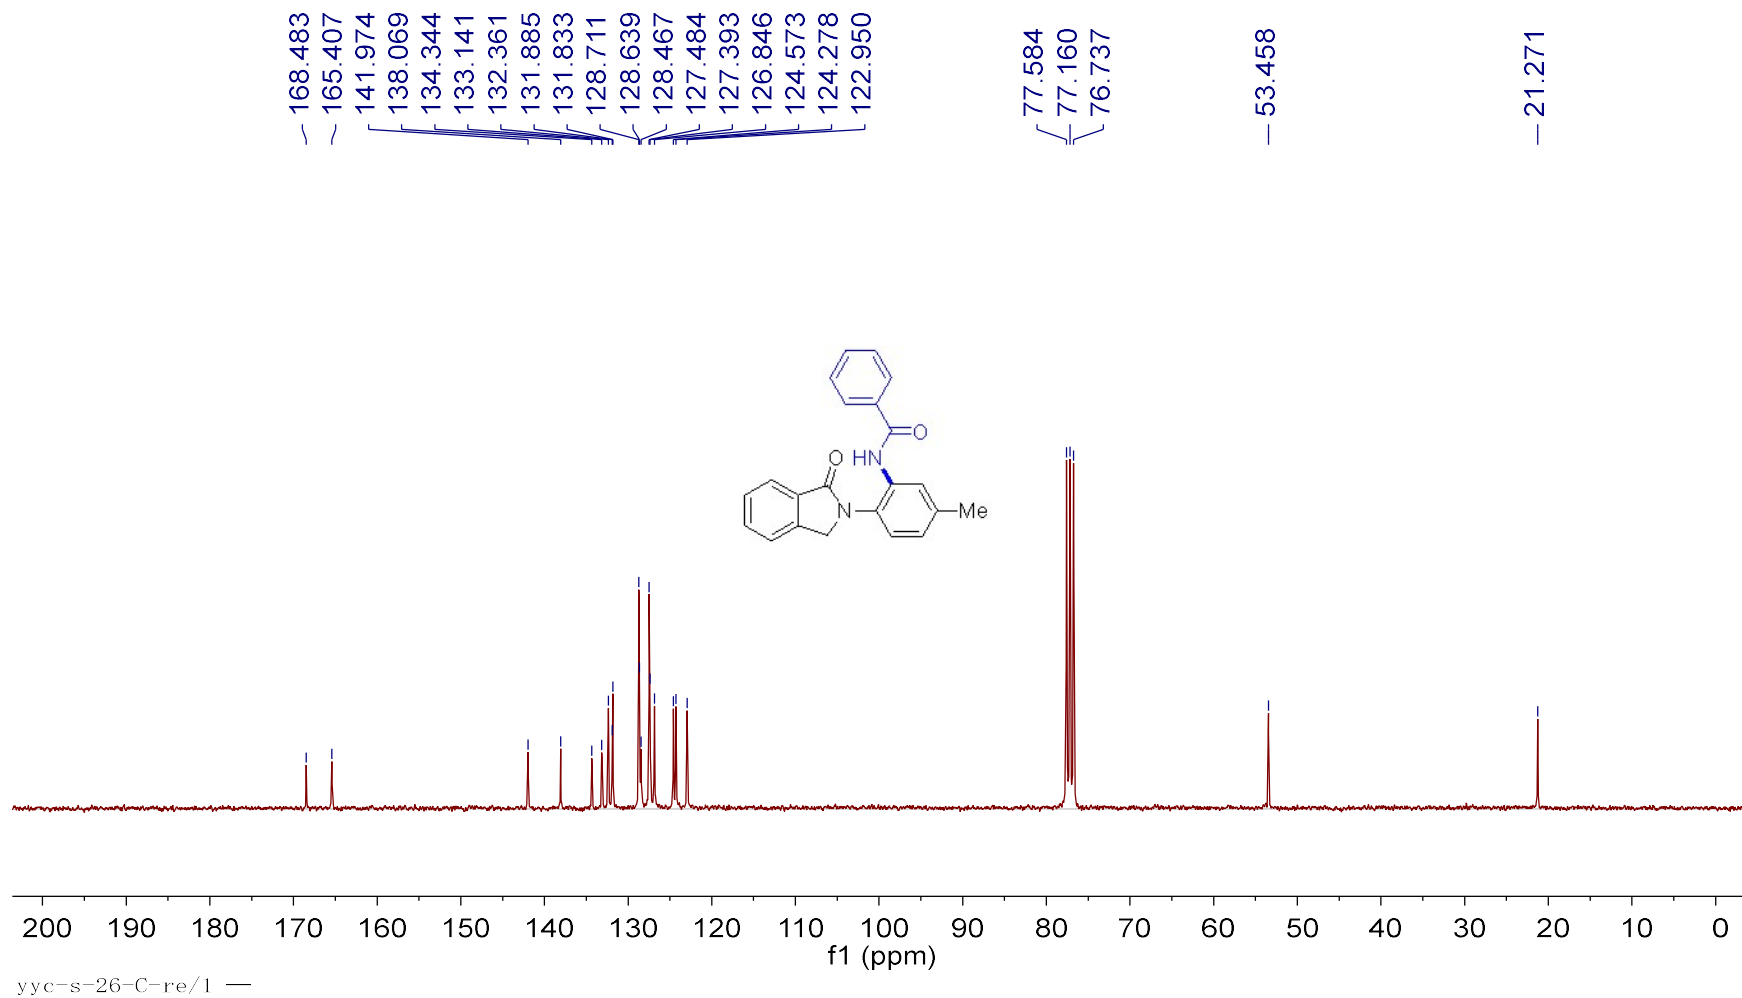

$^{13}\text{C}\{^1\text{H}\}$  NMR spectrum of **3b**.

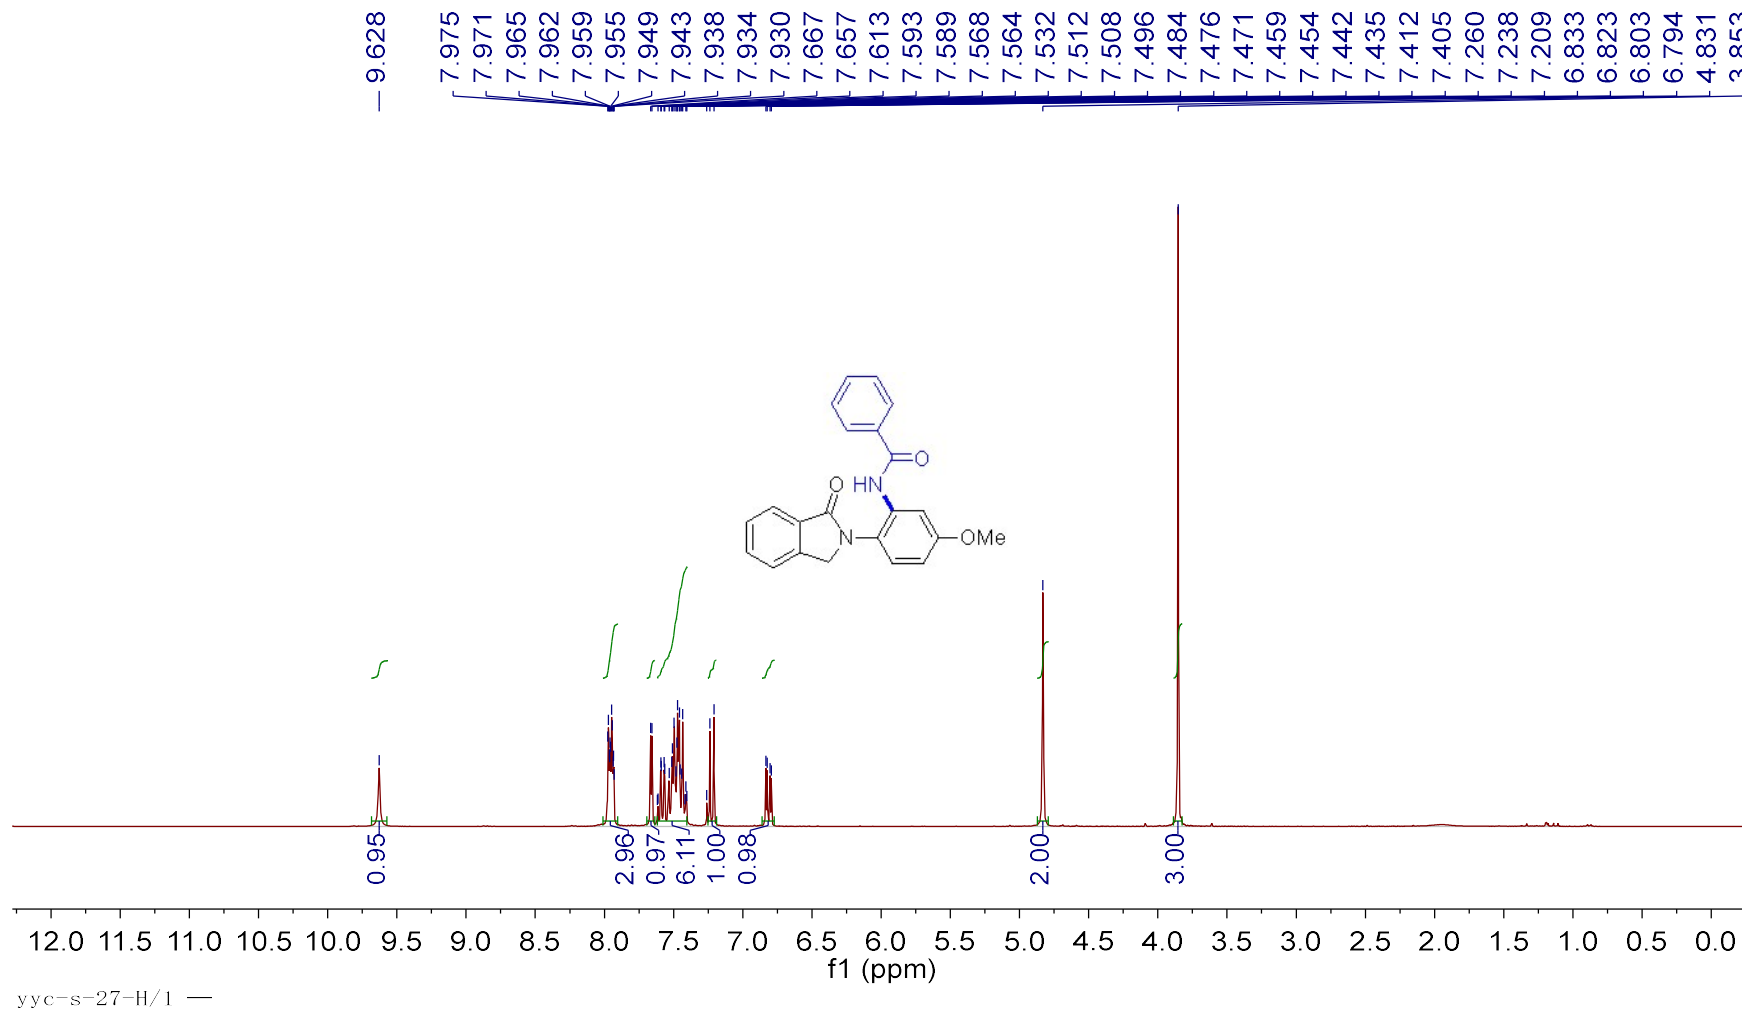

<sup>1</sup>H NMR spectrum of **3c**.

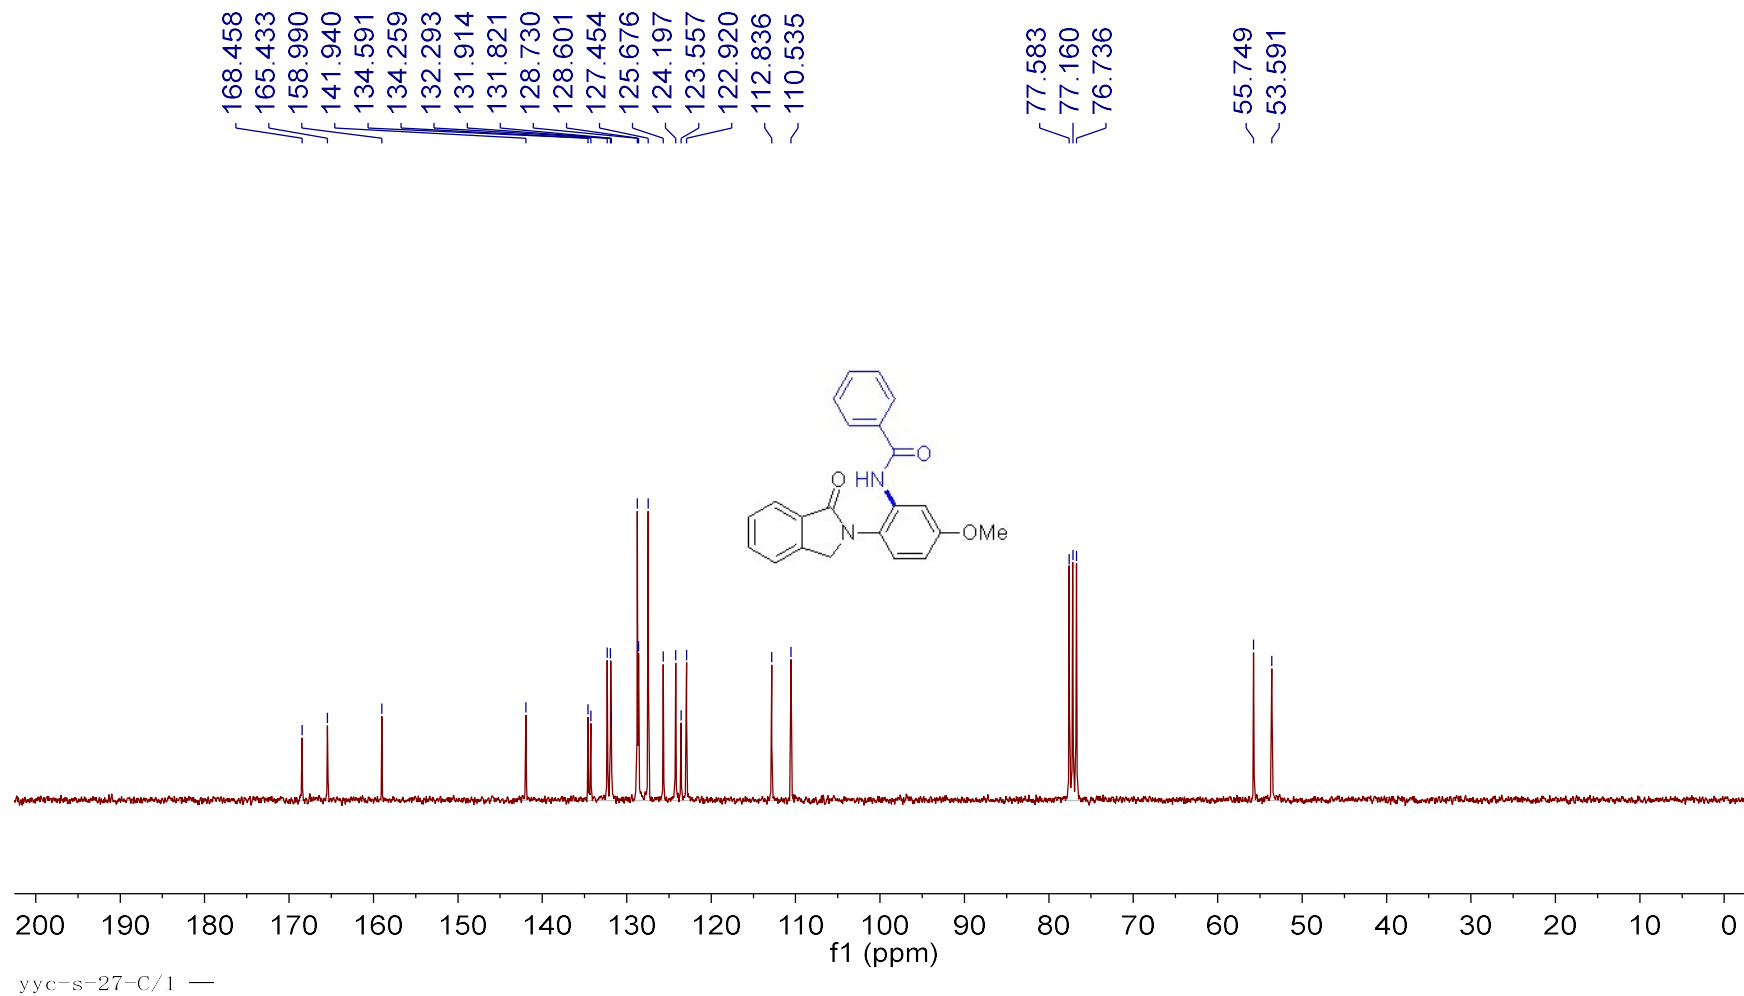

$^{13}\text{C}\{^1\text{H}\}$  NMR spectrum of **3c**.

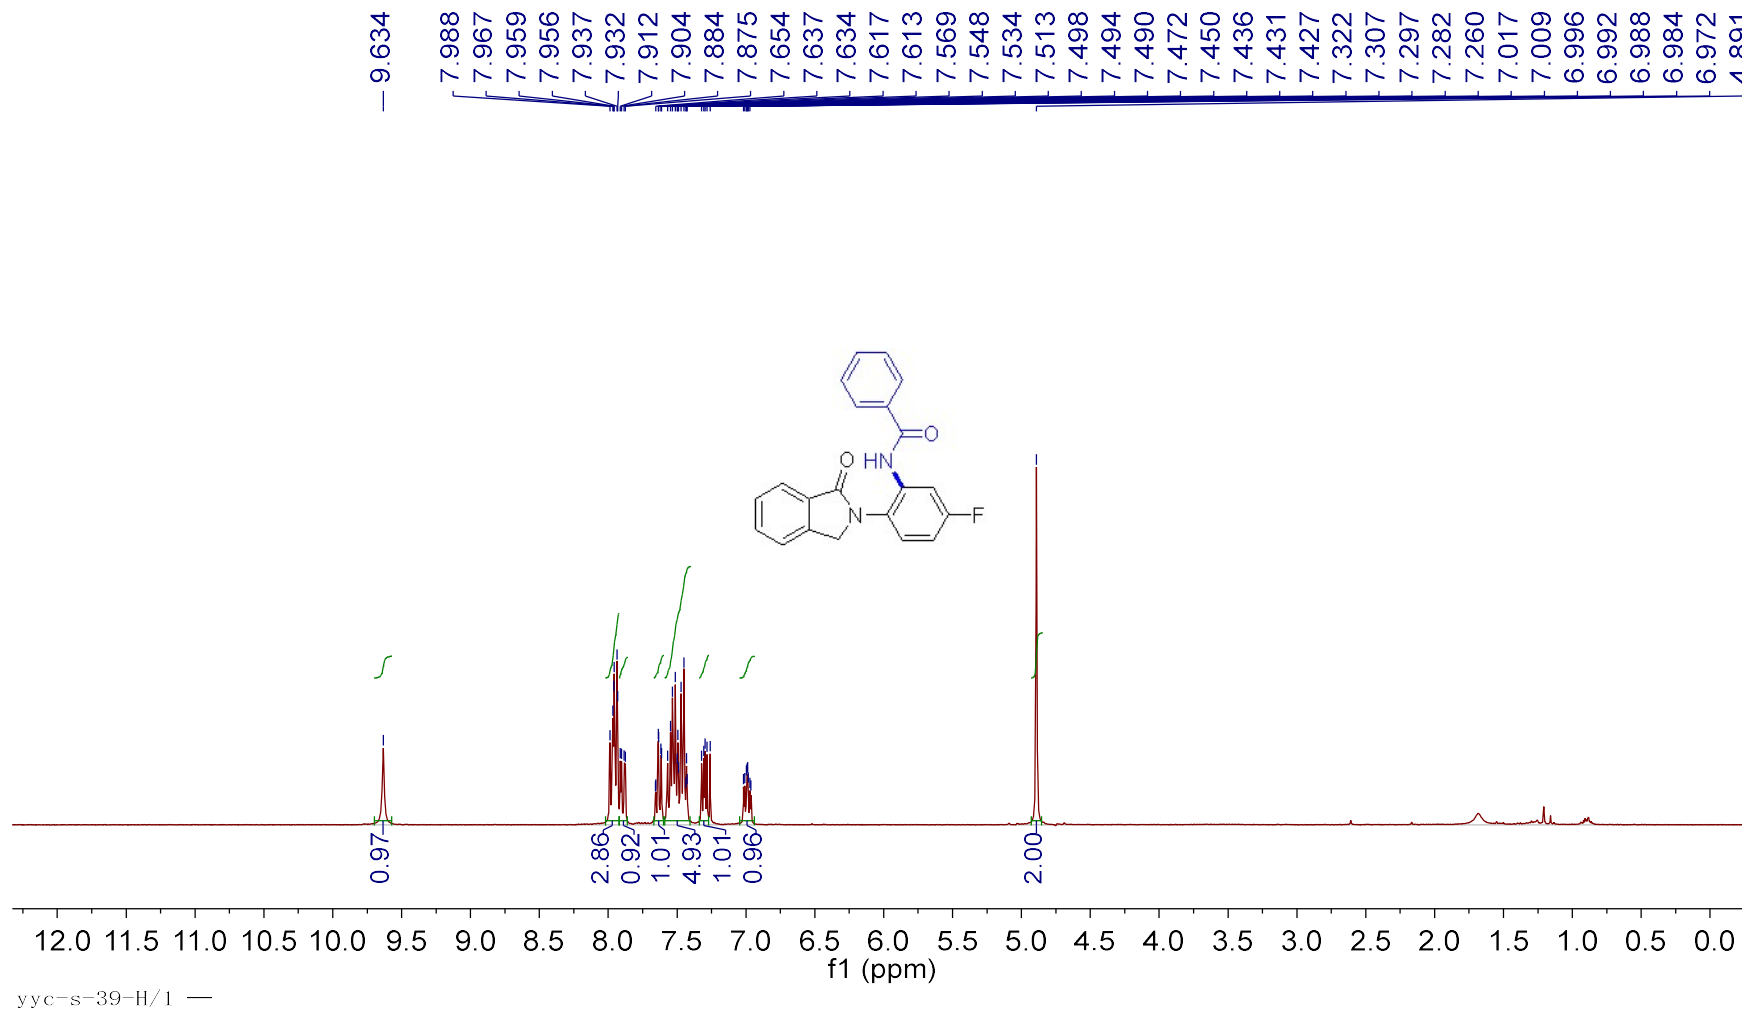

<sup>1</sup>H NMR spectrum of **3d**.



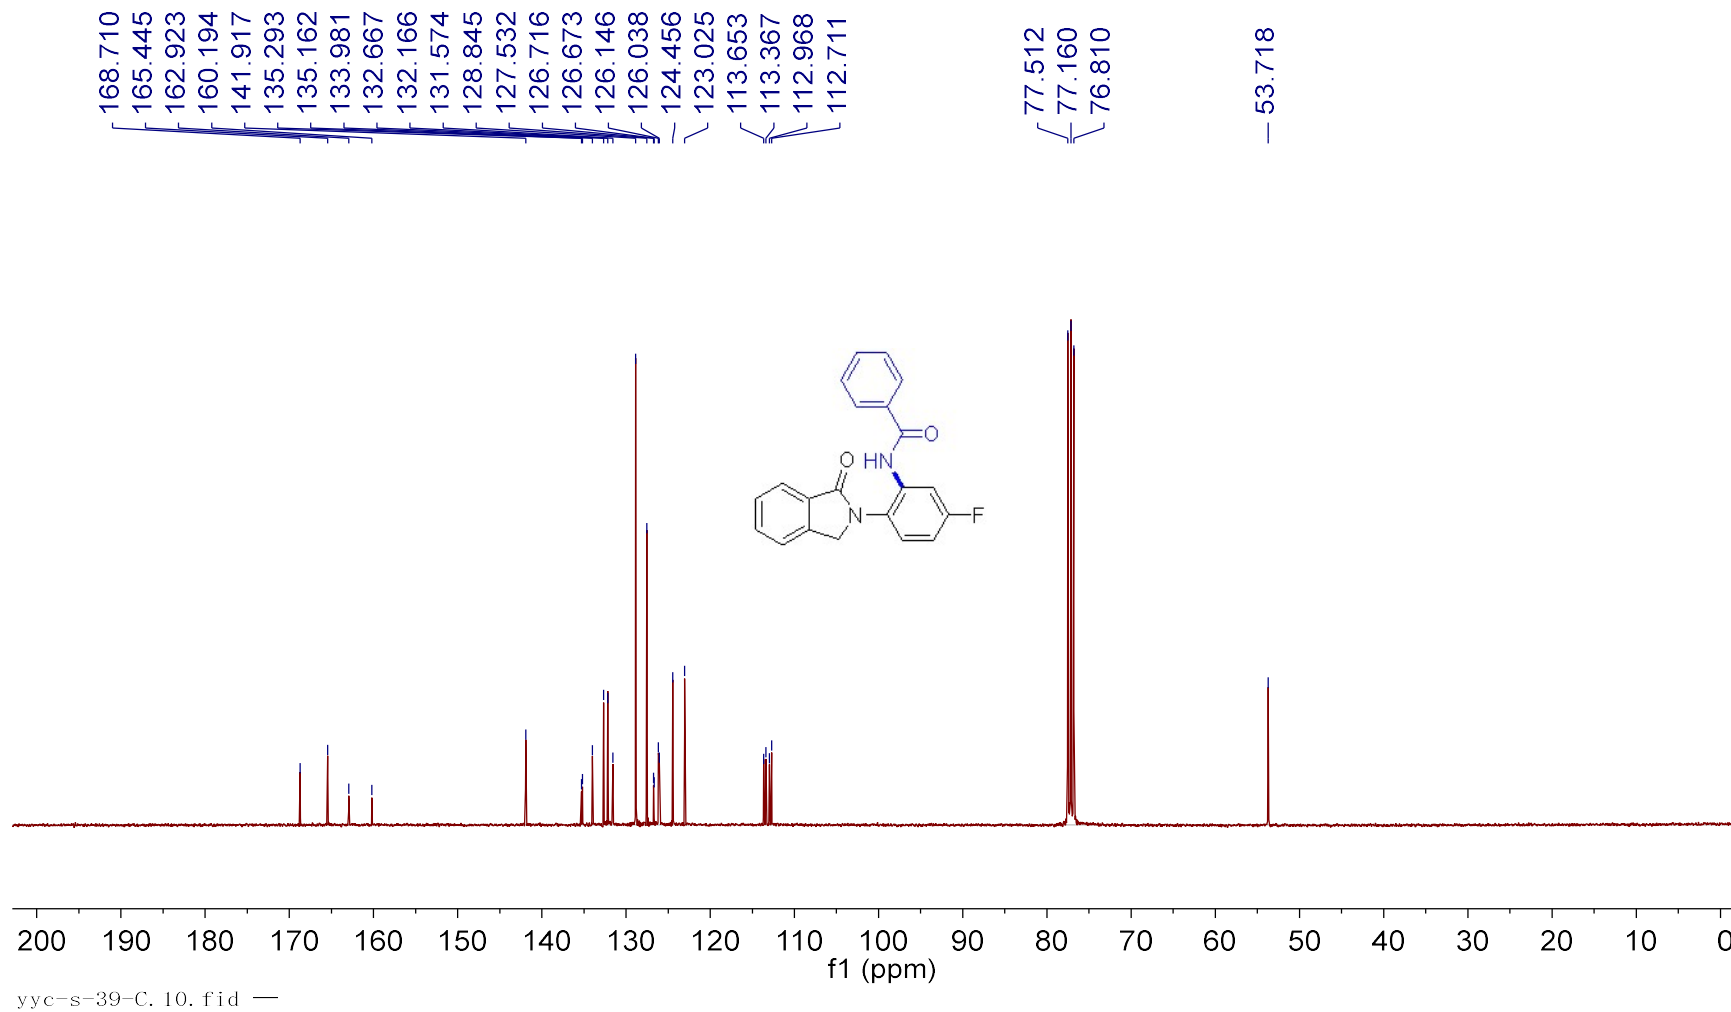

$^{13}\text{C}\{^1\text{H}\}$  NMR spectrum of **3d**.

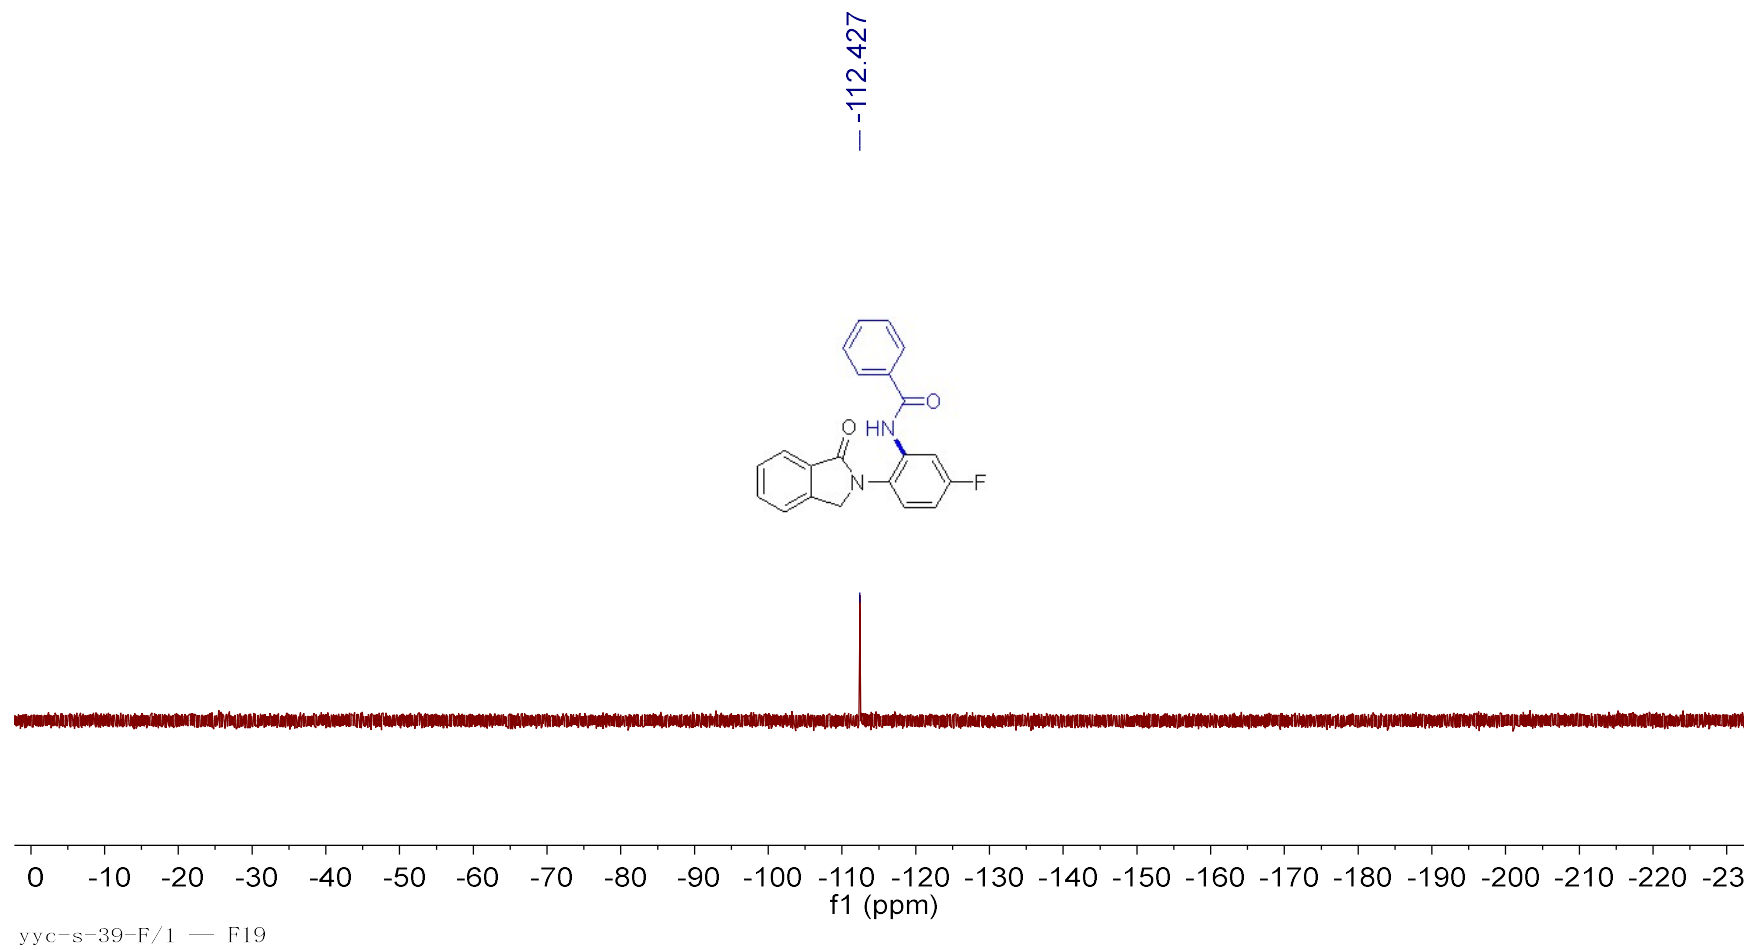

$^{19}\text{F}\{^1\text{H}\}$  NMR spectrum of **3d**.

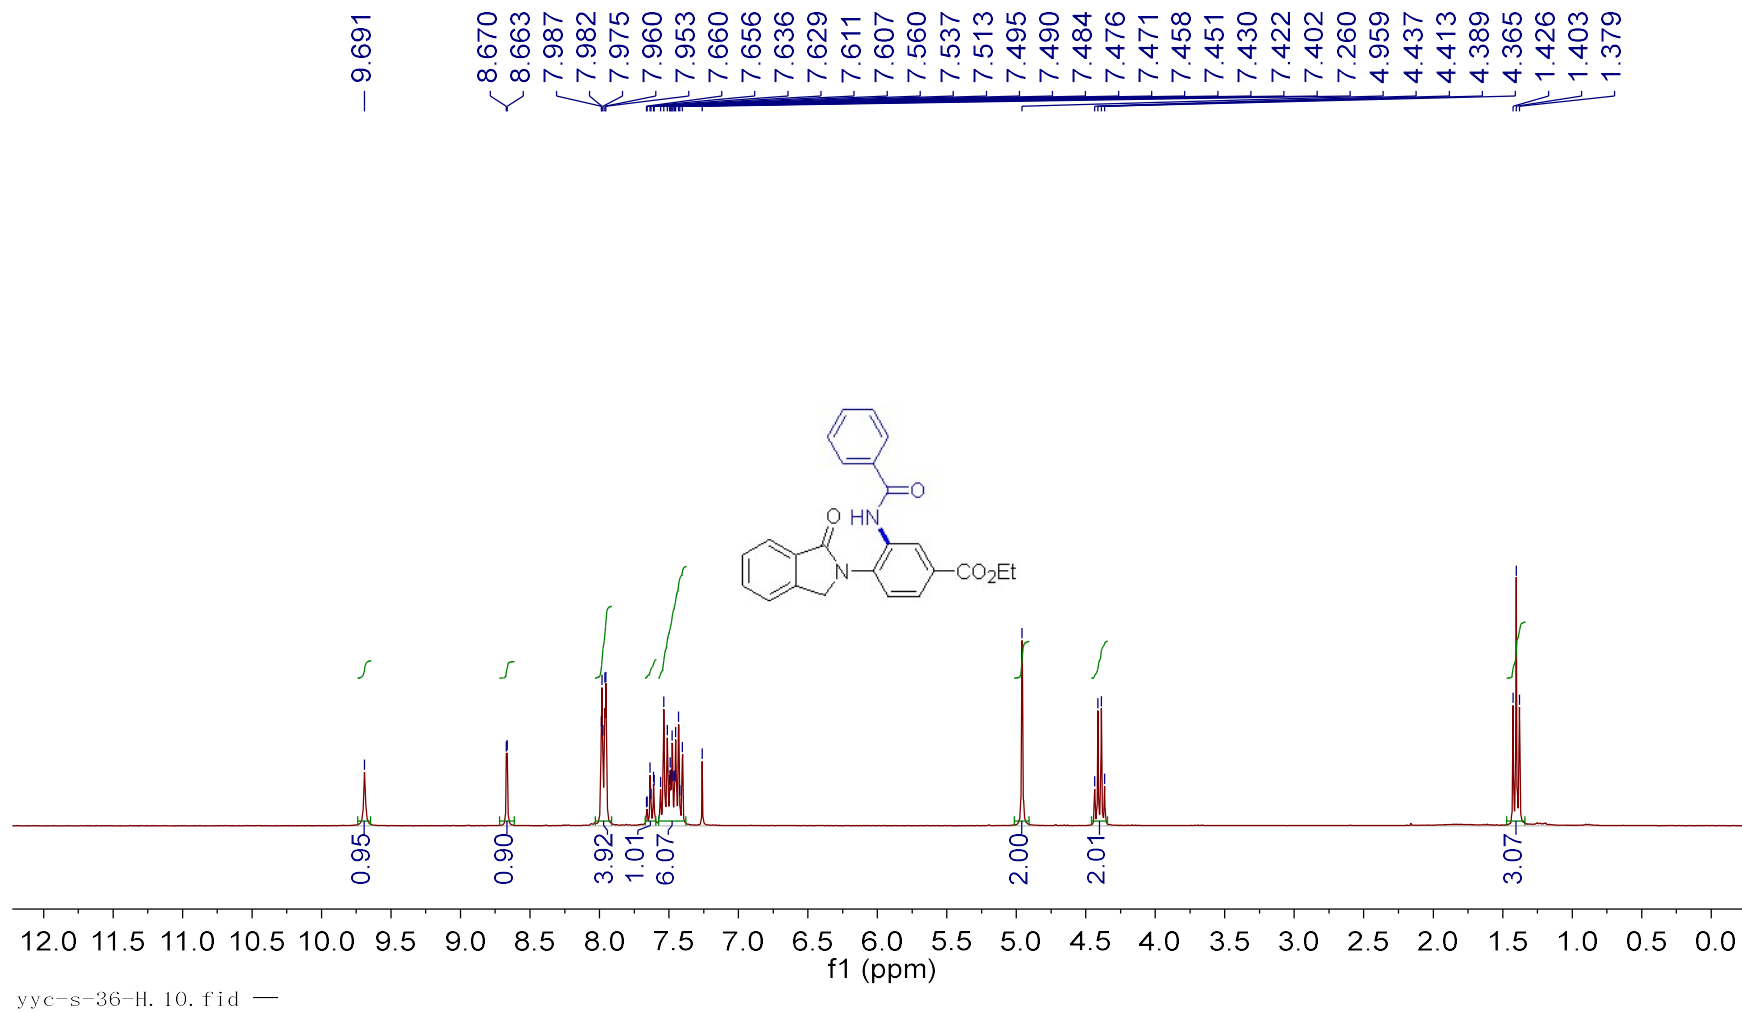

<sup>1</sup>H NMR spectrum of **3e**.

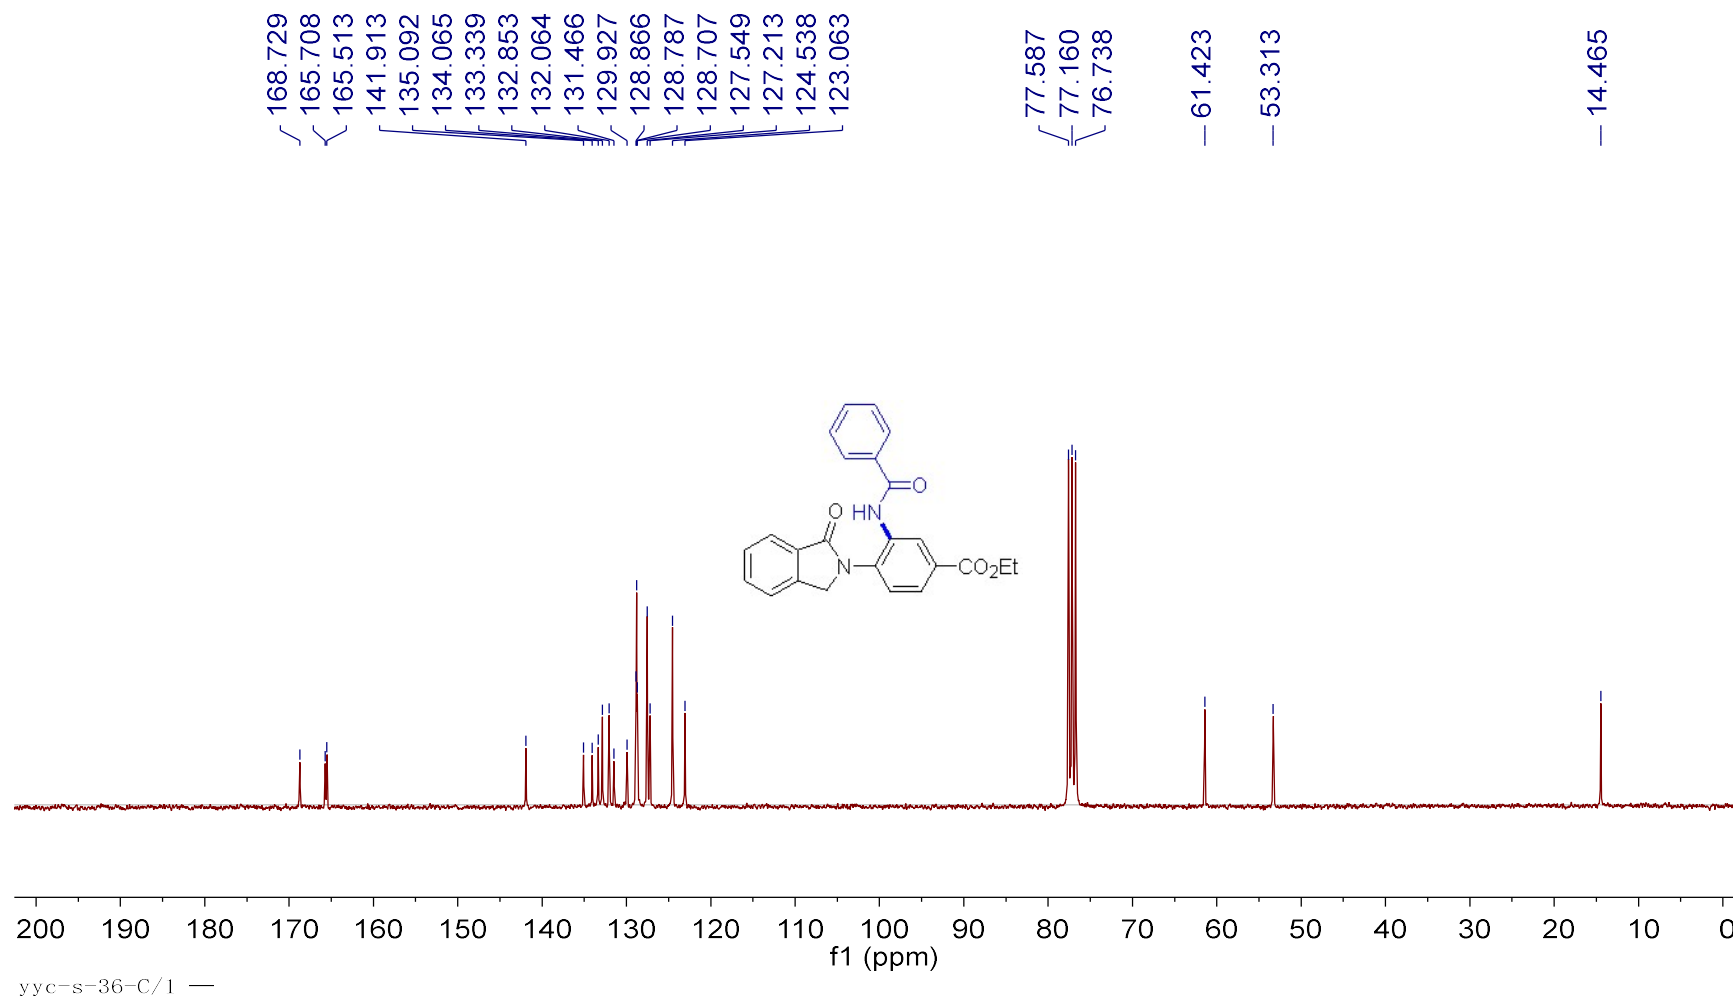

$^{13}\text{C}\{^1\text{H}\}$  NMR spectrum of **3e**.

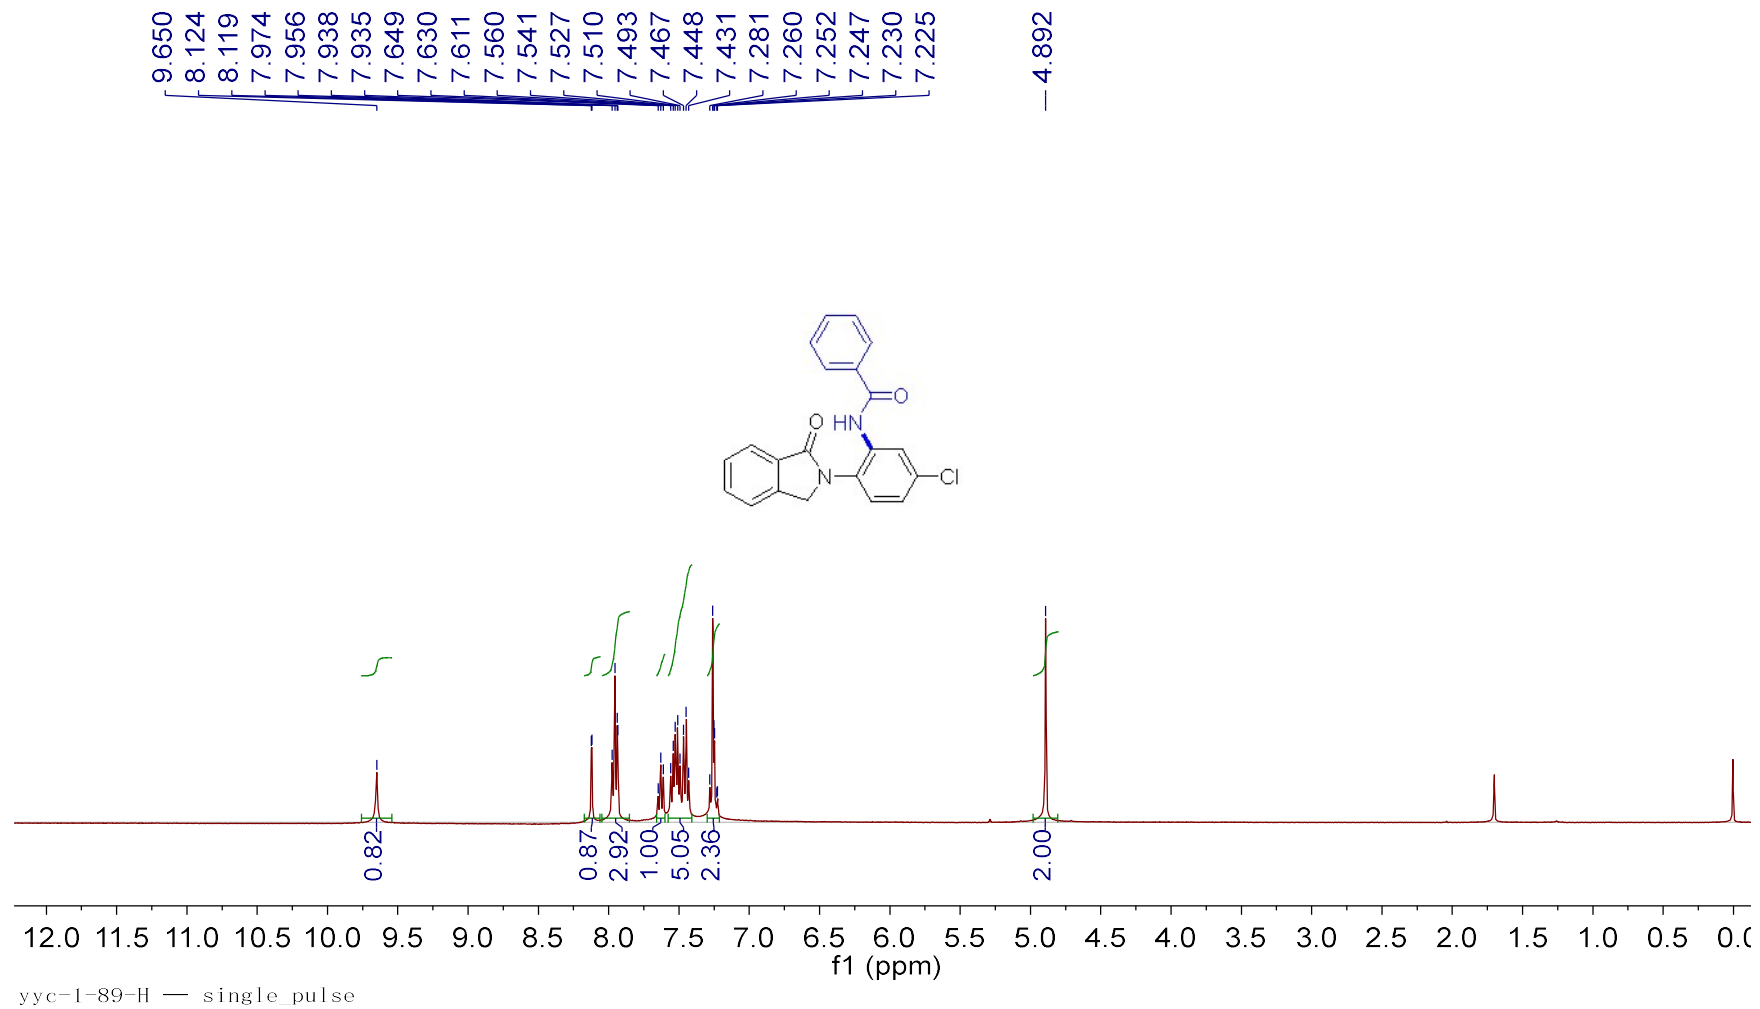

<sup>1</sup>H NMR spectrum of **3f**.

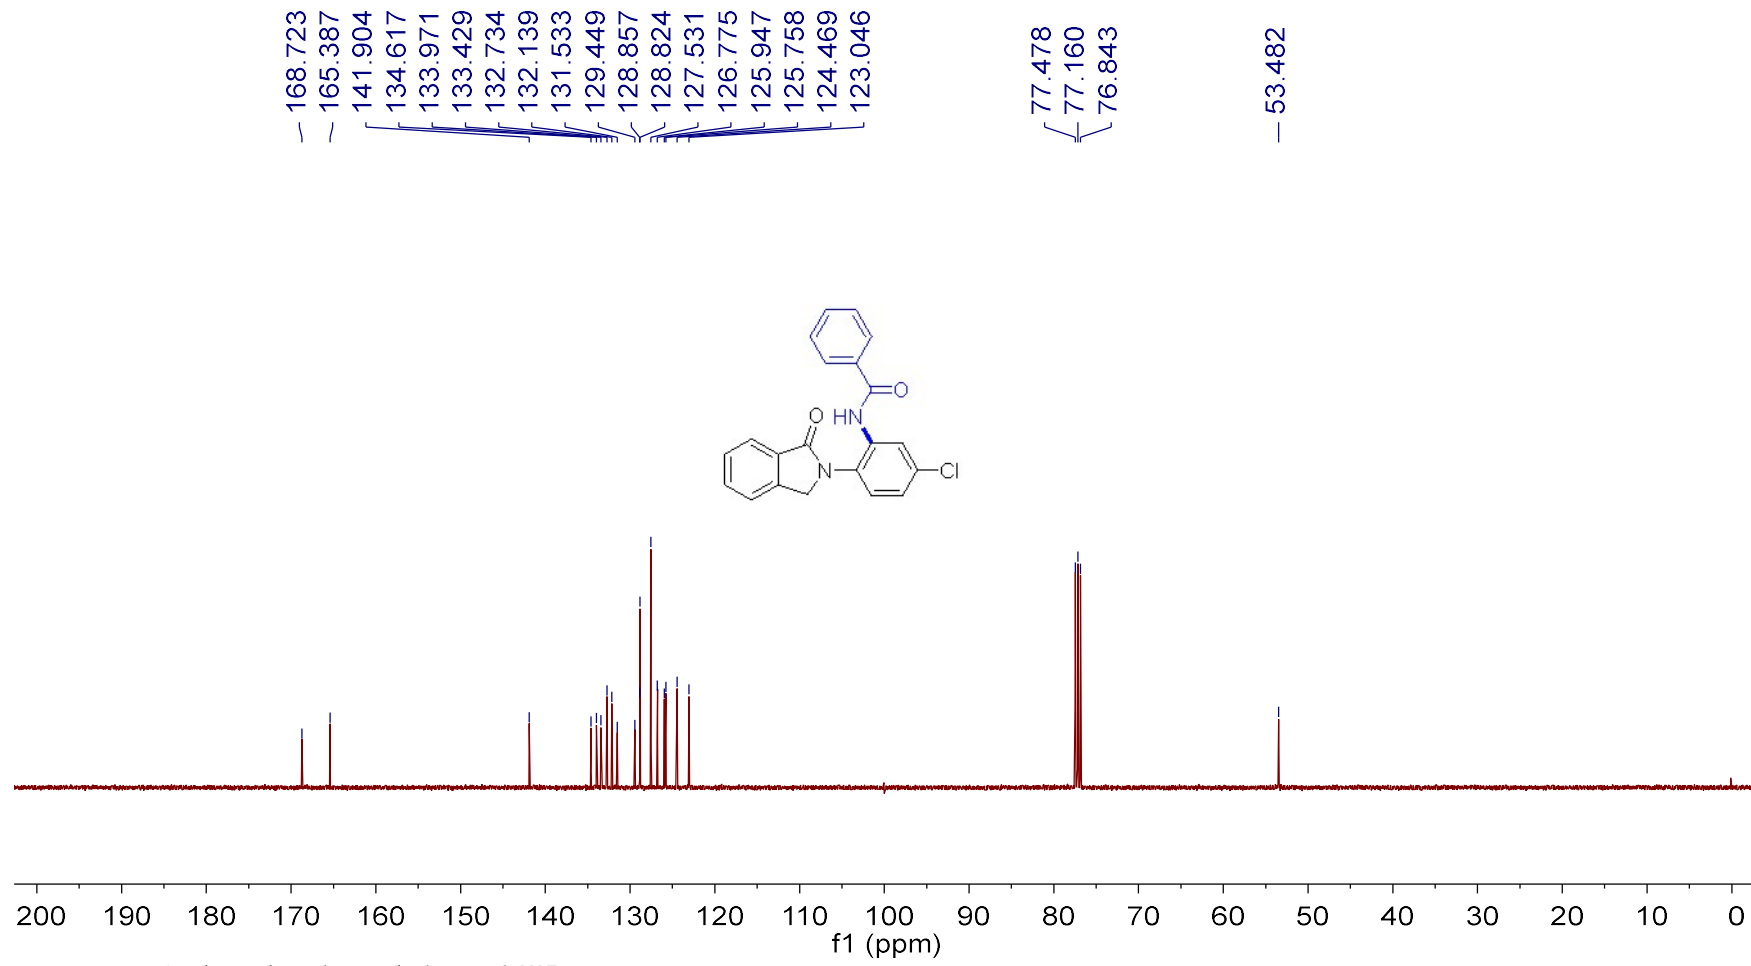

YYC-89 — single pulse decoupled gated NOE

$^{13}\text{C}\{^1\text{H}\}$  NMR spectrum of **3f**.

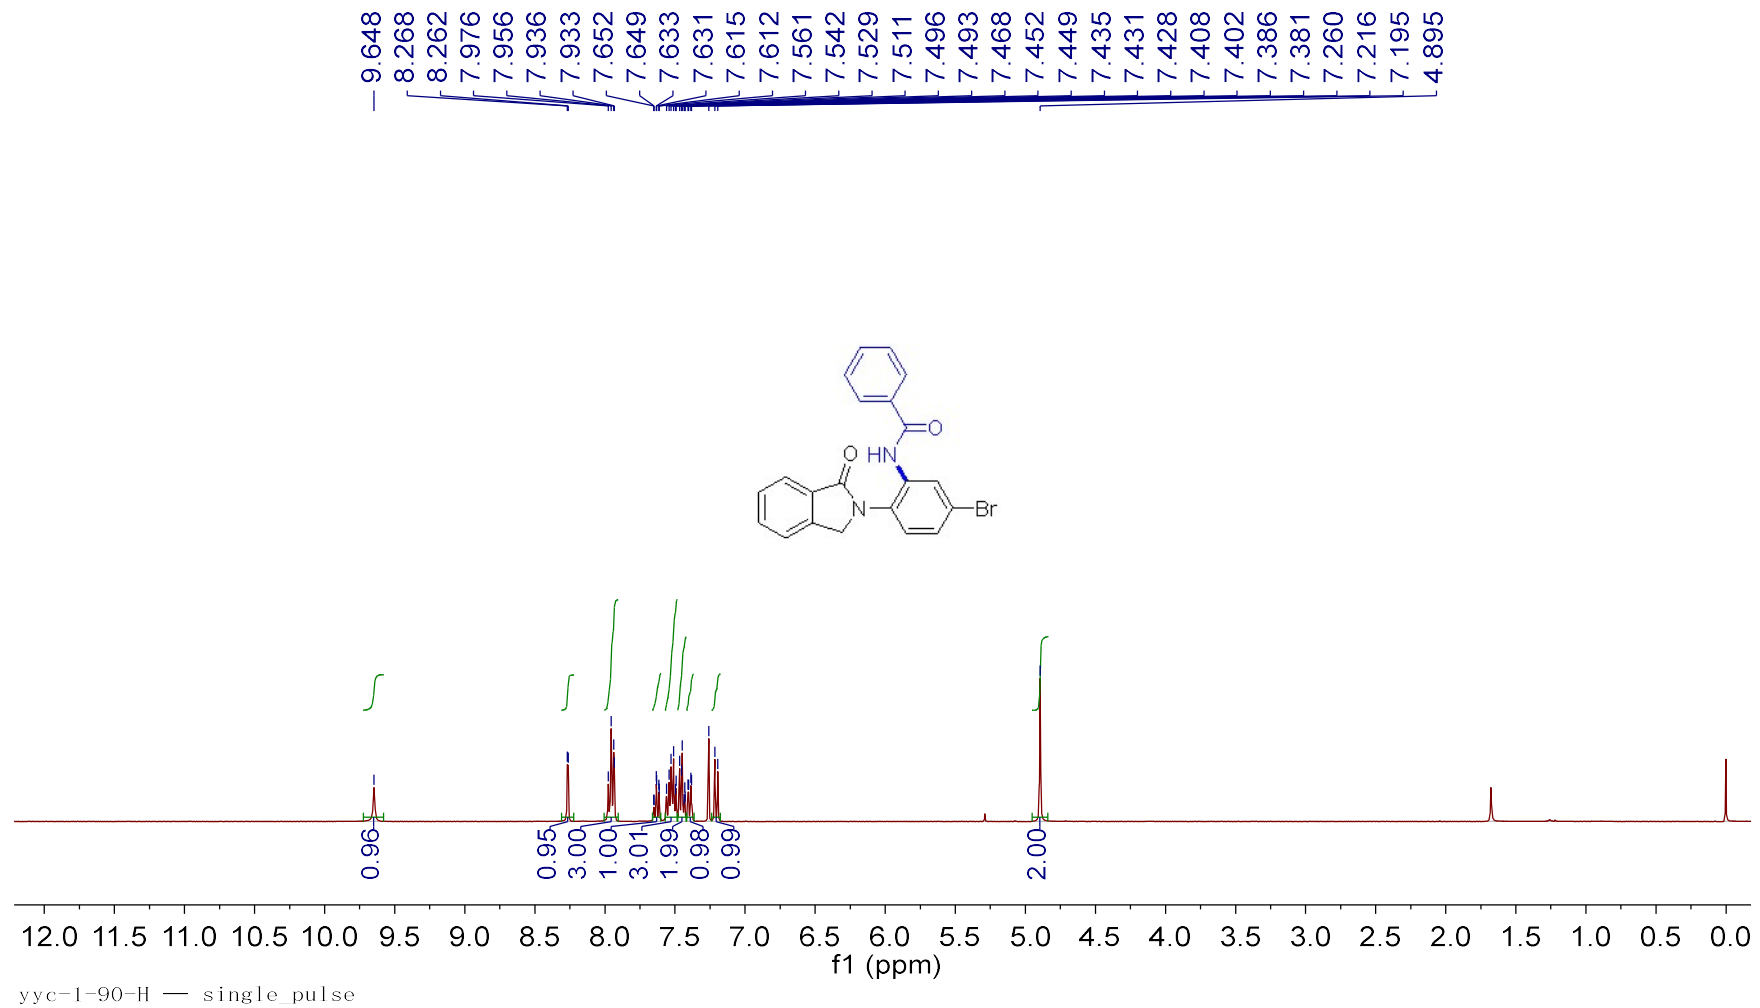

<sup>1</sup>H NMR spectrum of **3g**.

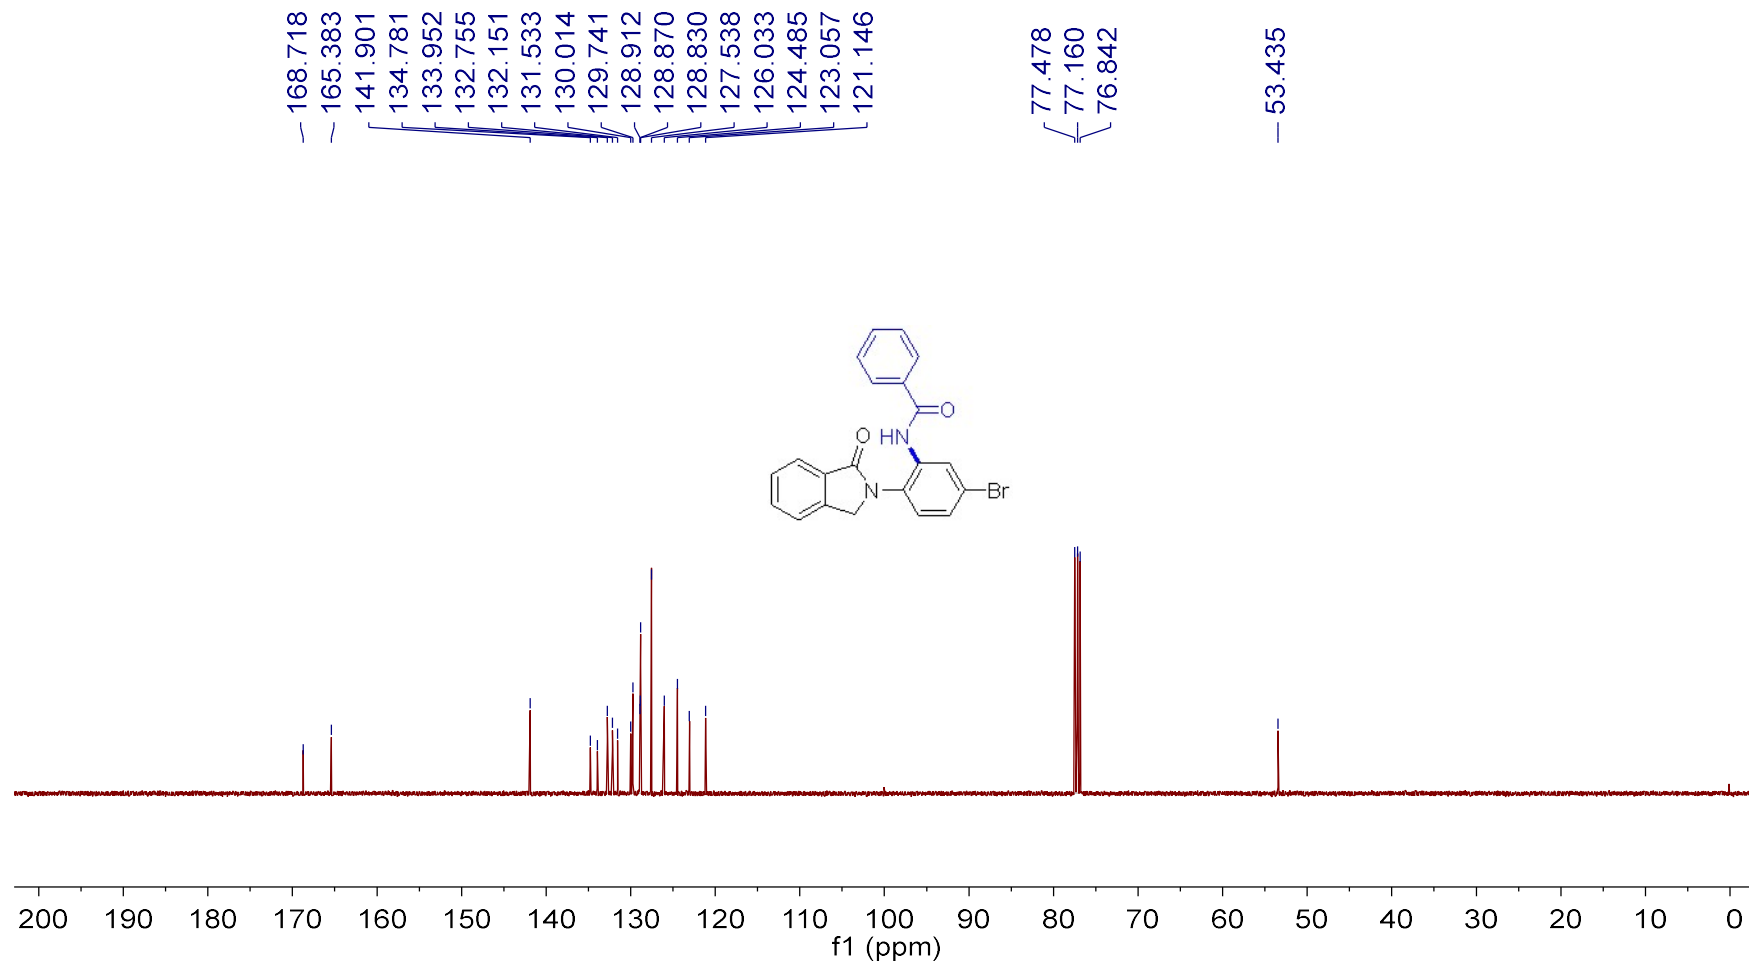

$^{13}\text{C}\{^1\text{H}\}$  NMR spectrum of **3g**.



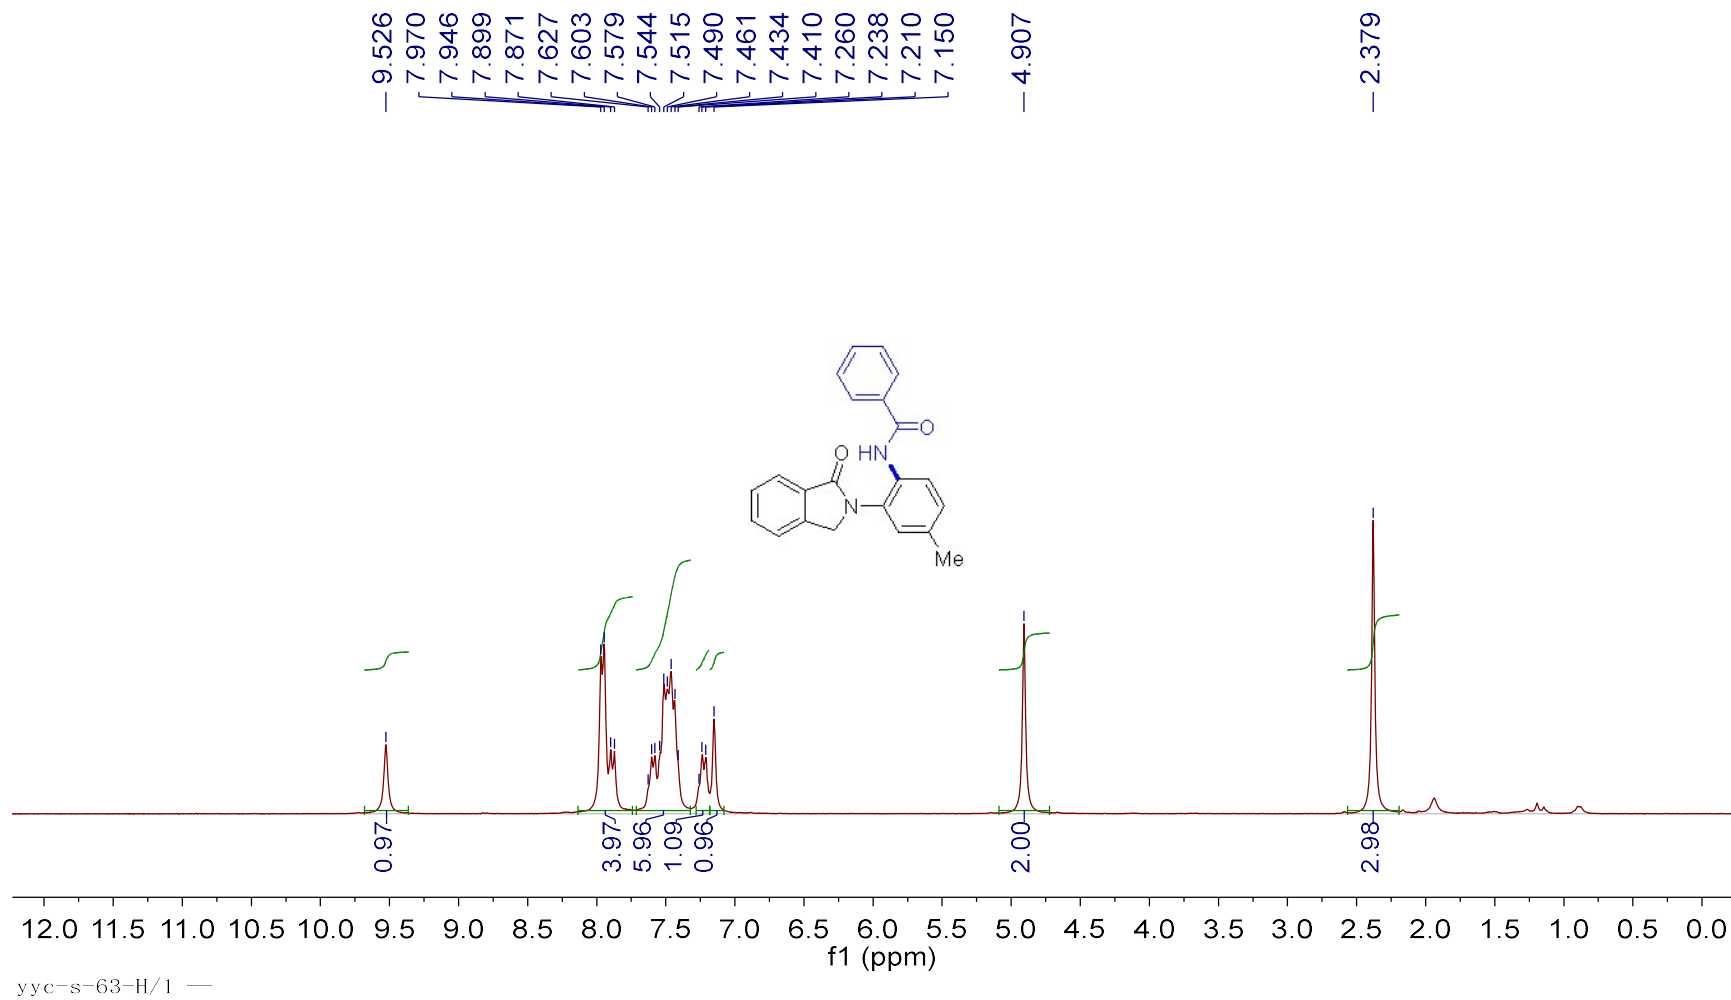

<sup>1</sup>H NMR spectrum of **3h**.

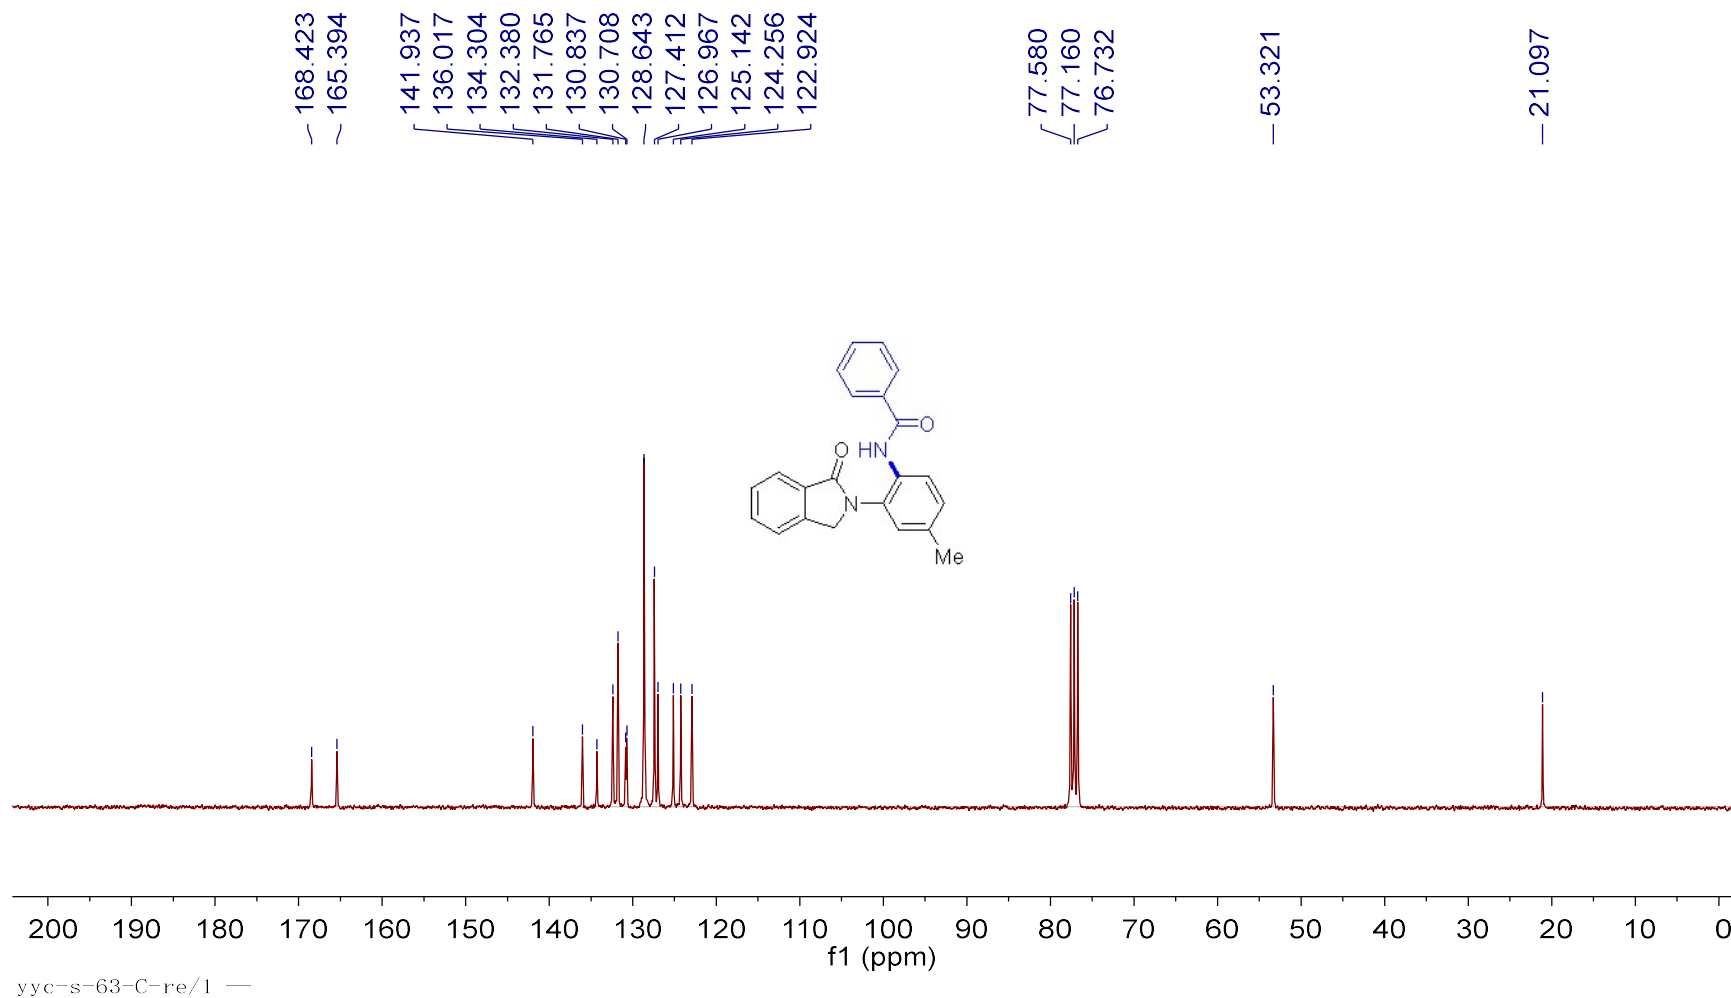

$^{13}\text{C}\{^1\text{H}\}$  NMR spectrum of **3h**.

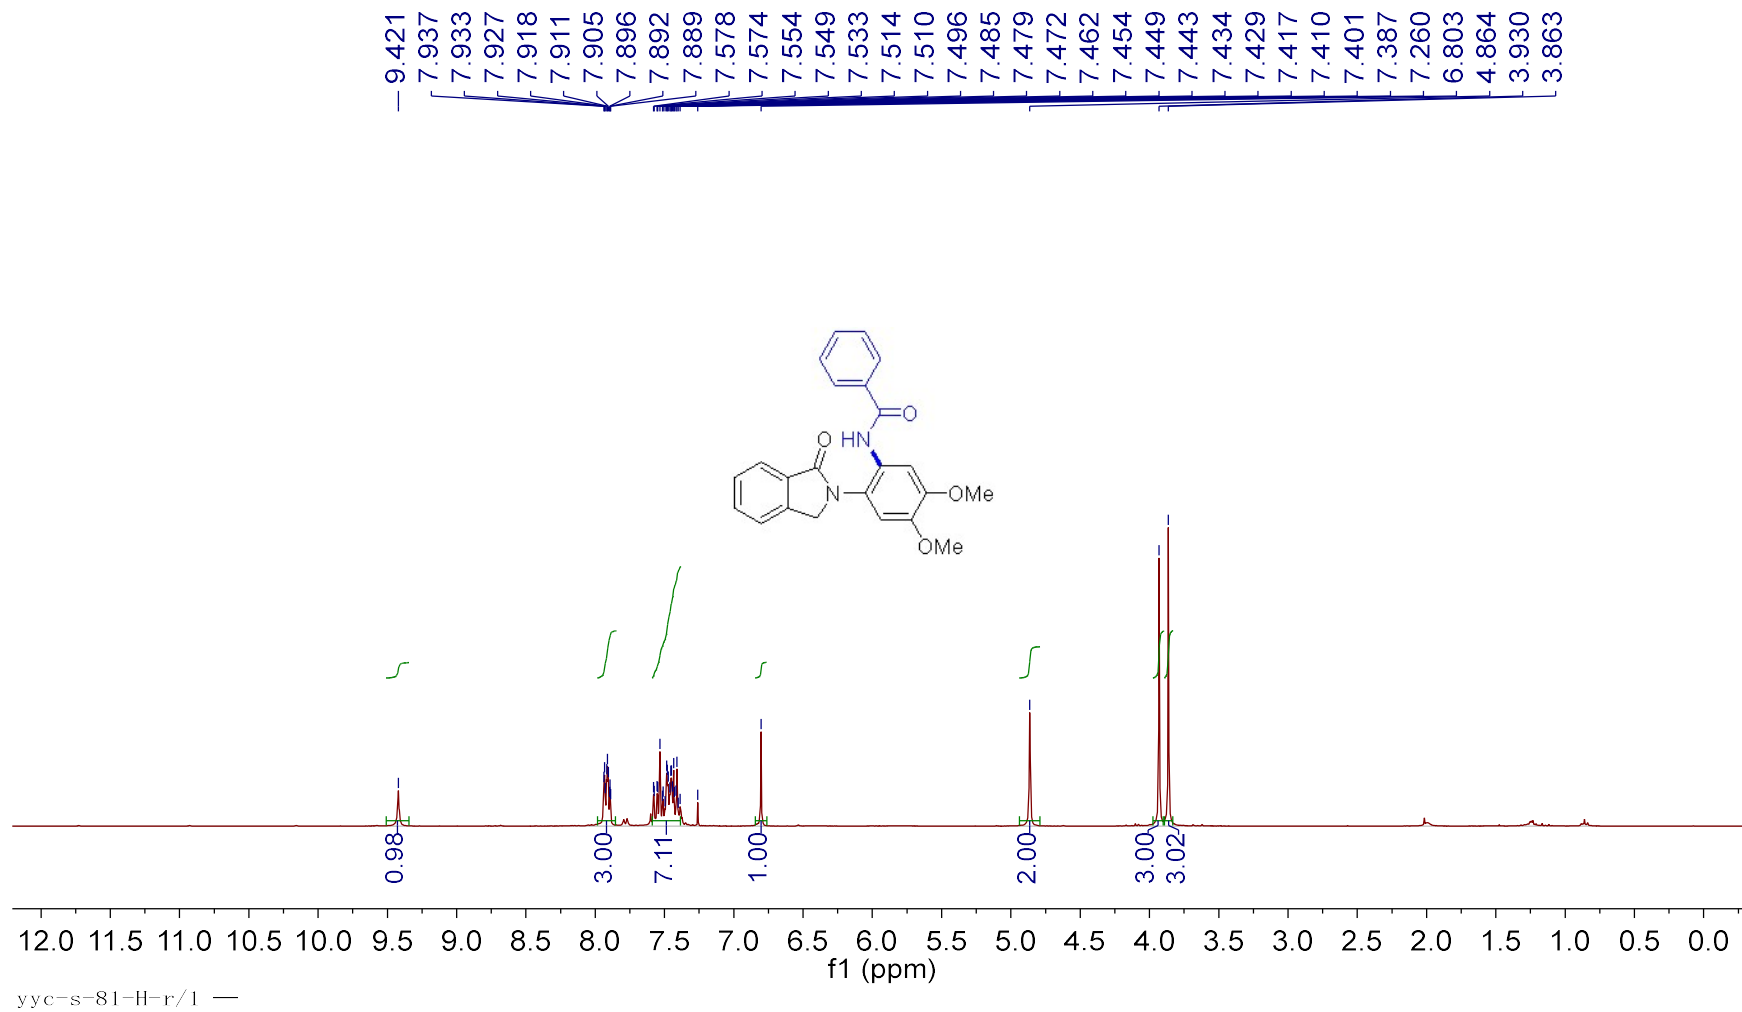

<sup>1</sup>H NMR spectrum of **3i**.

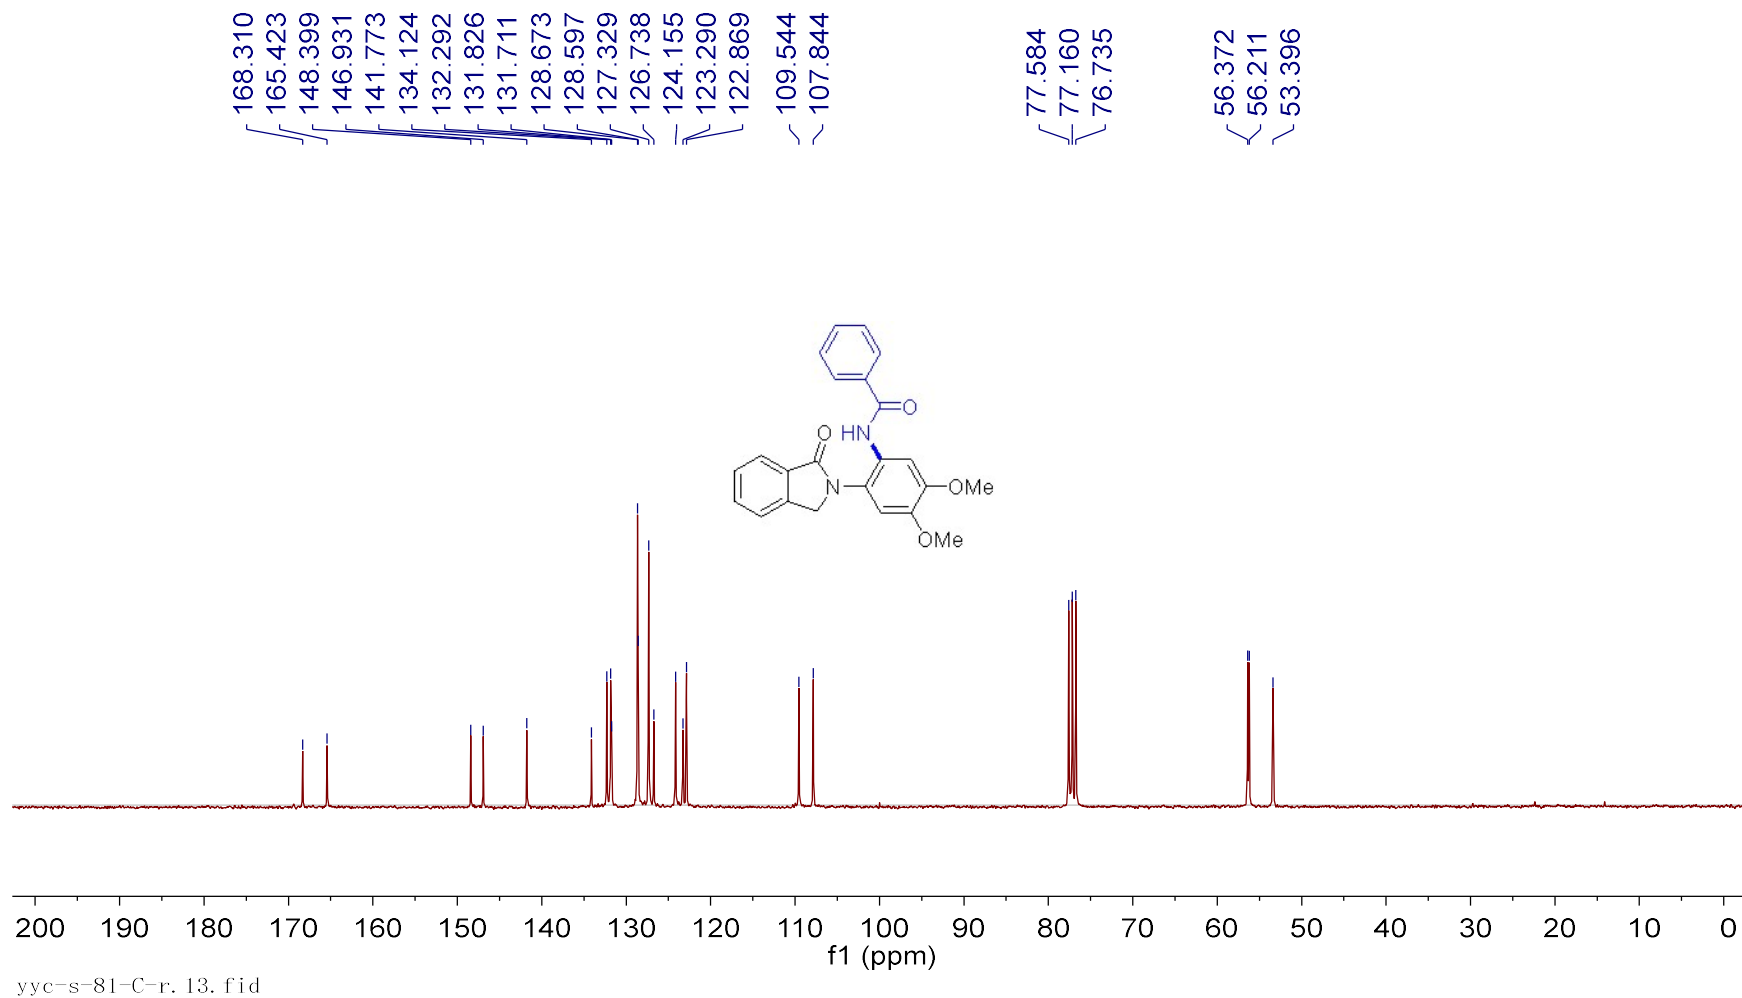

$^{13}\text{C}\{^1\text{H}\}$  NMR spectrum of **3i**.

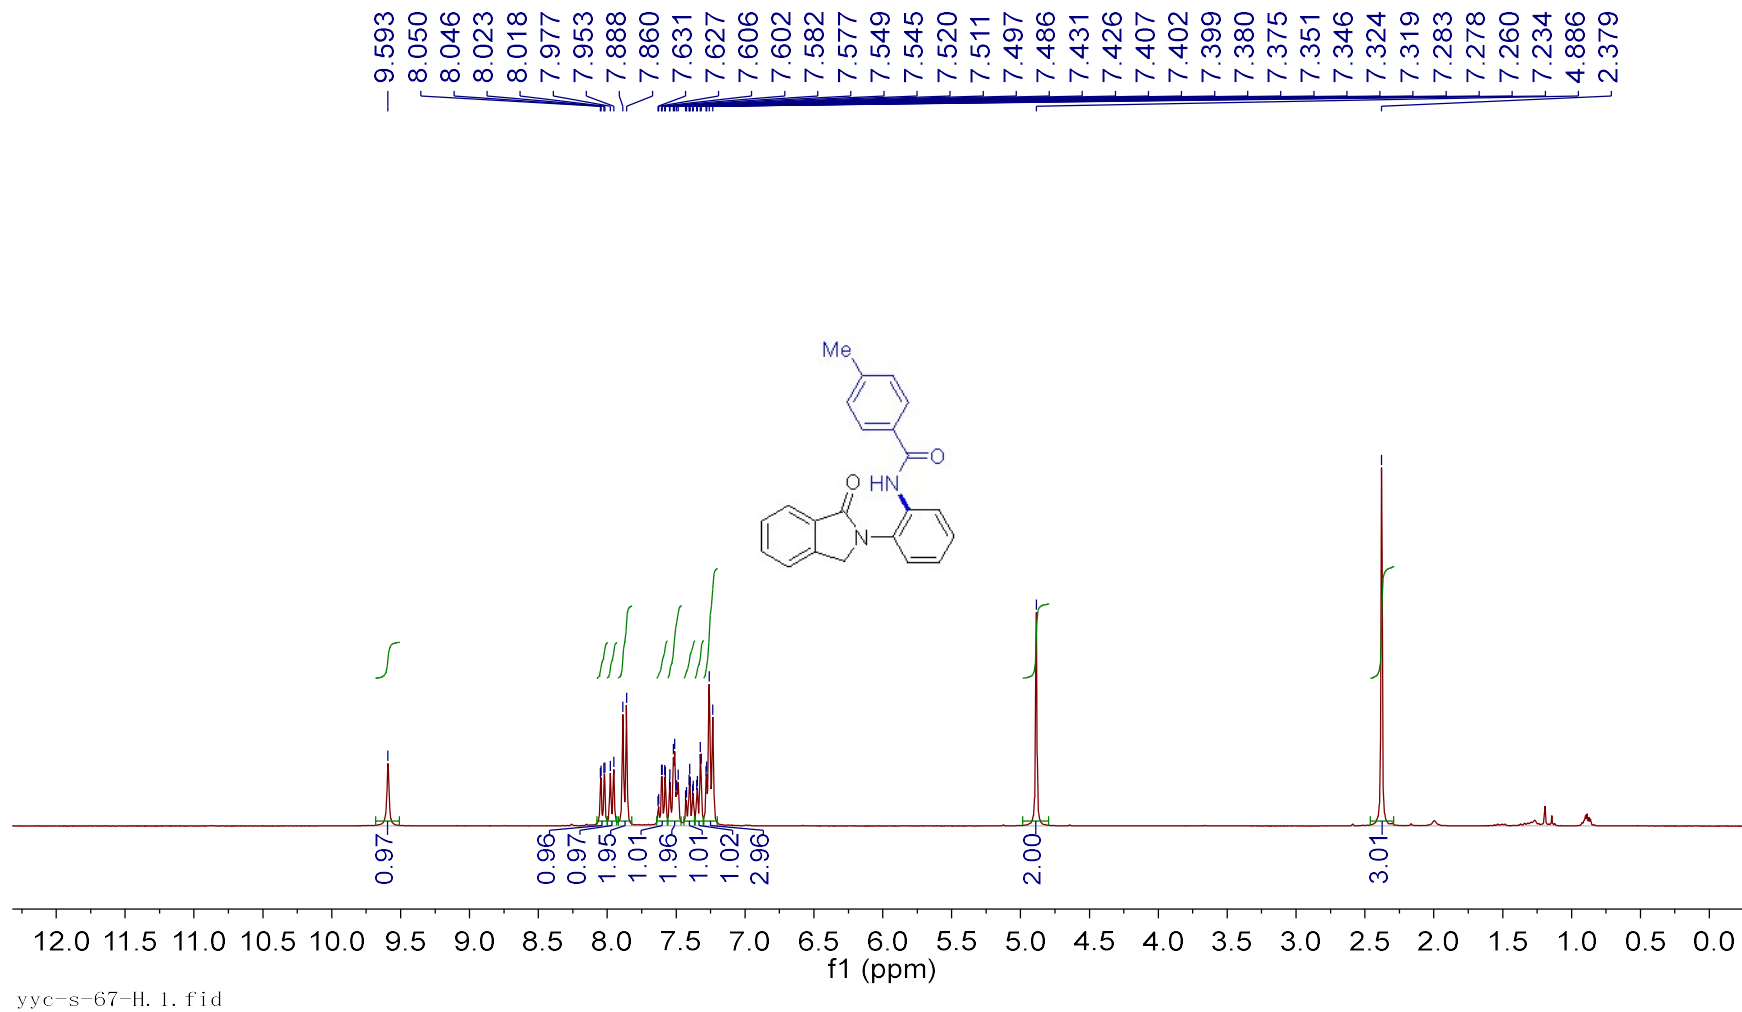

<sup>1</sup>H NMR spectrum of **3j**.

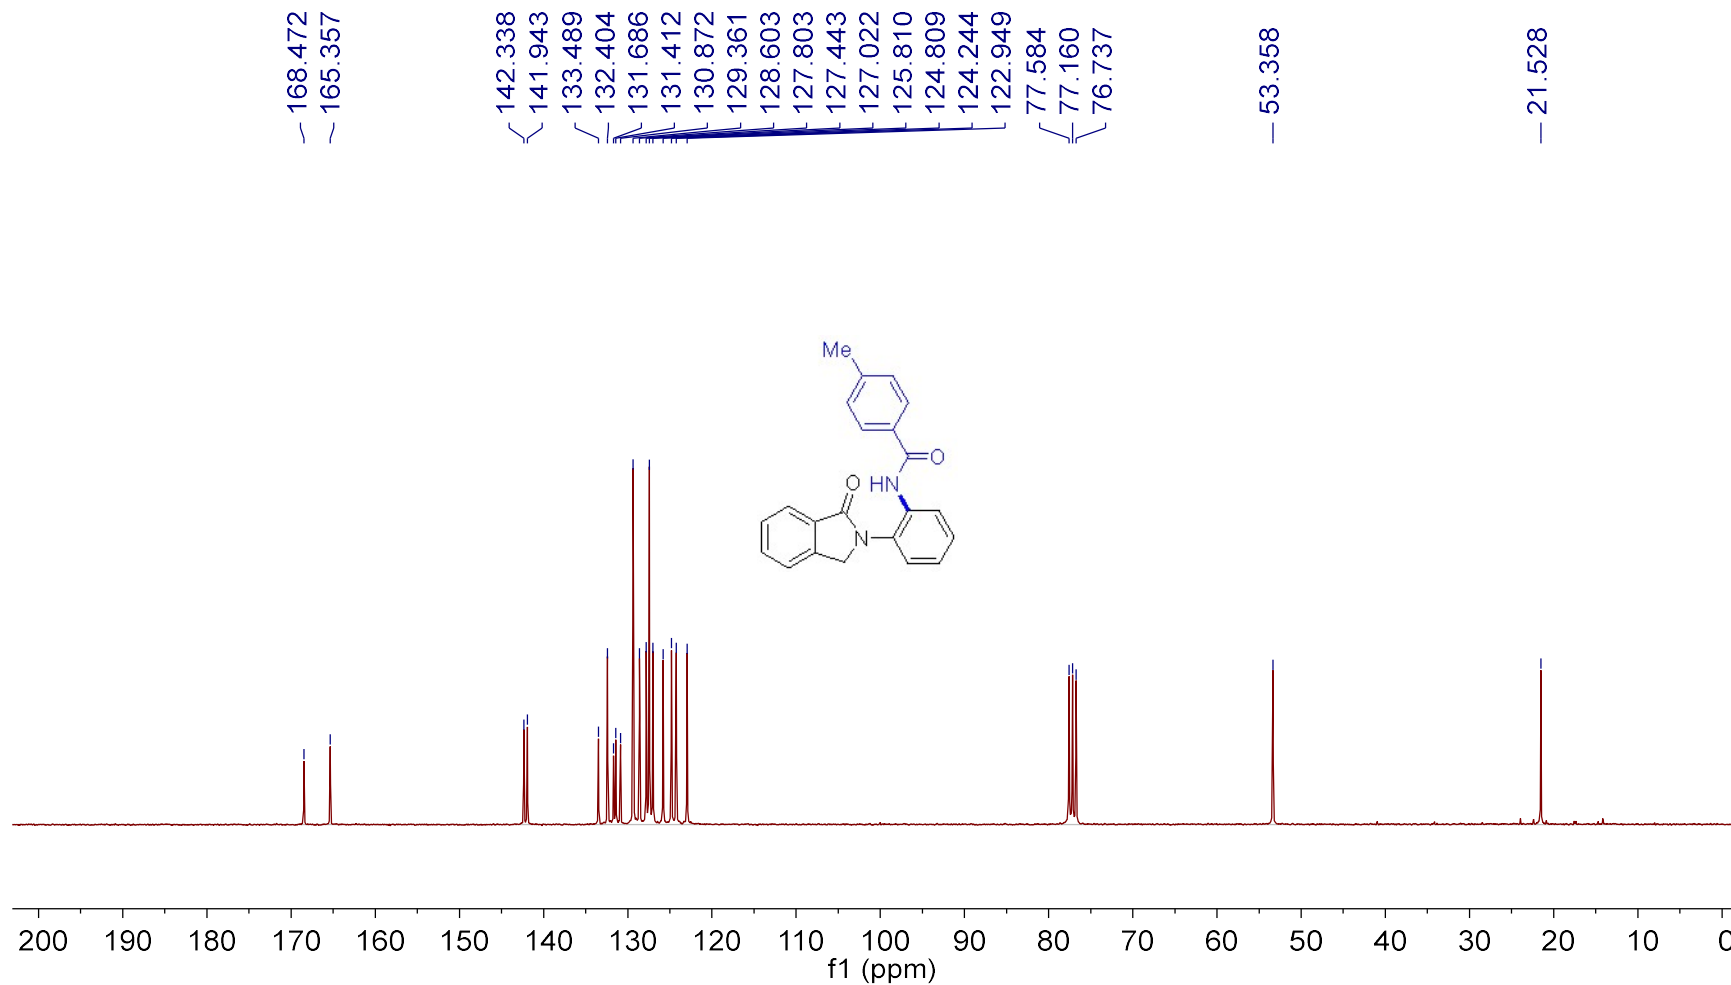

$^{13}\text{C}\{^1\text{H}\}$  NMR spectrum of **3j**.

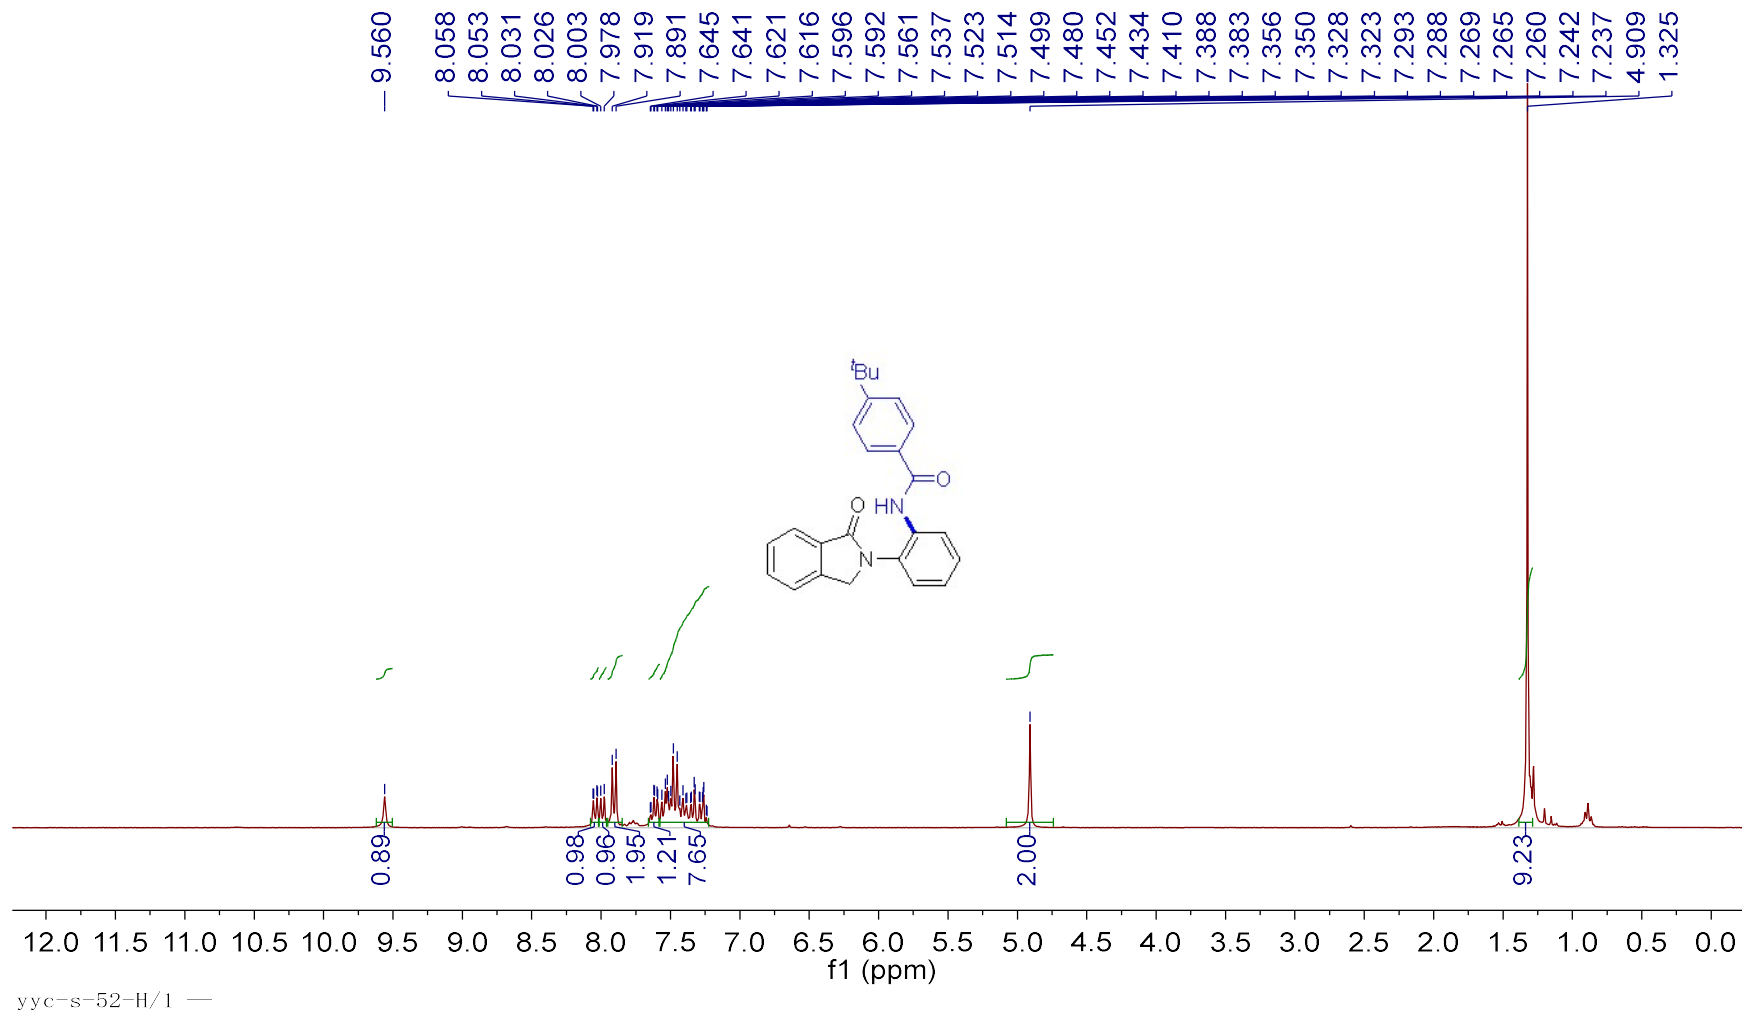

<sup>1</sup>H NMR spectrum of **3k**.

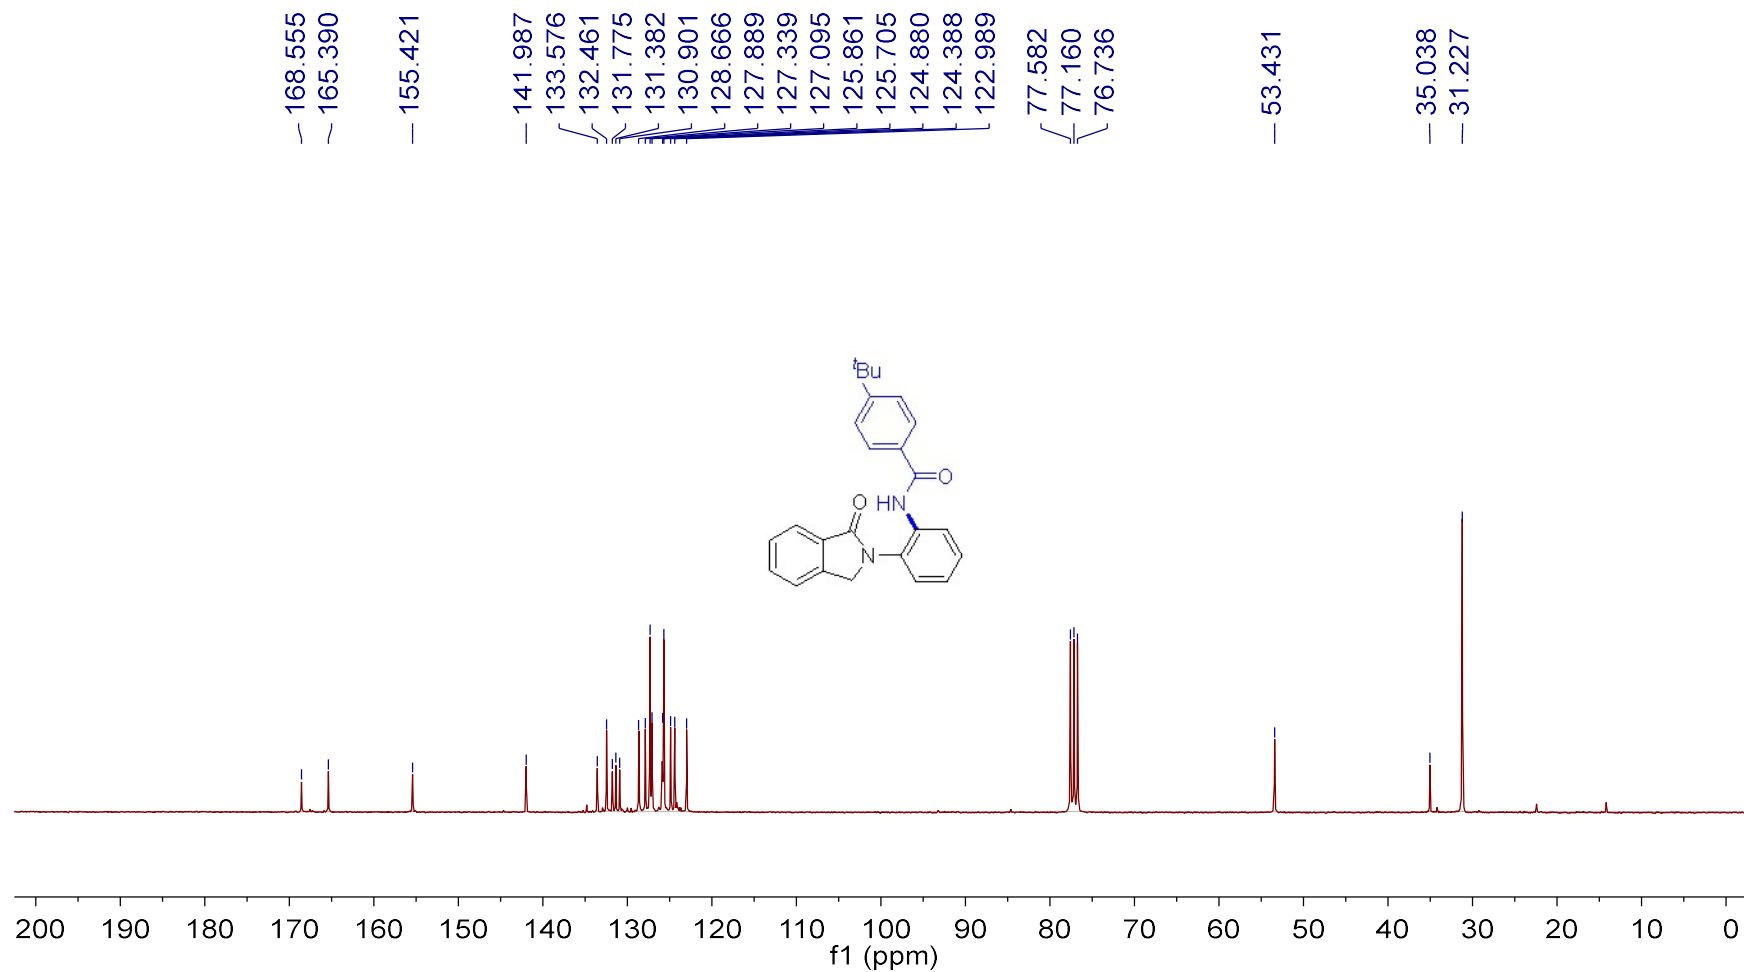

yc-s-52-C-re. 13. fid

$^{13}\text{C}\{^1\text{H}\}$  NMR spectrum of **3k**.



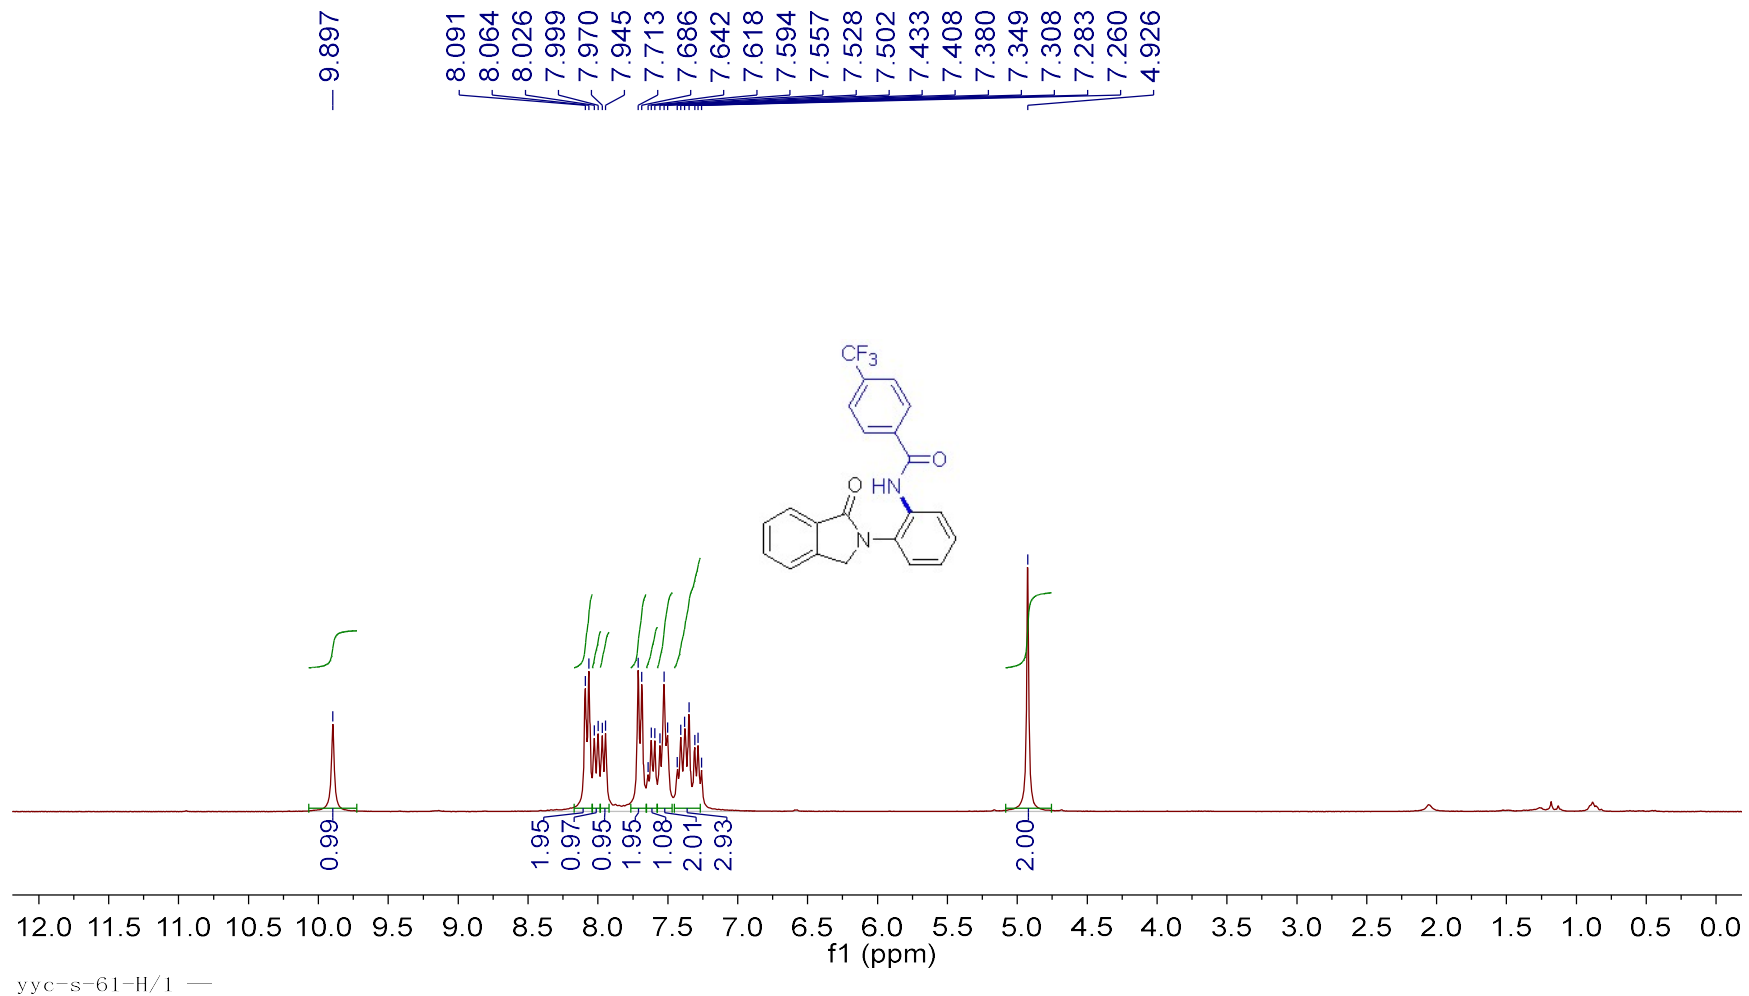

<sup>1</sup>H NMR spectrum of **31**.

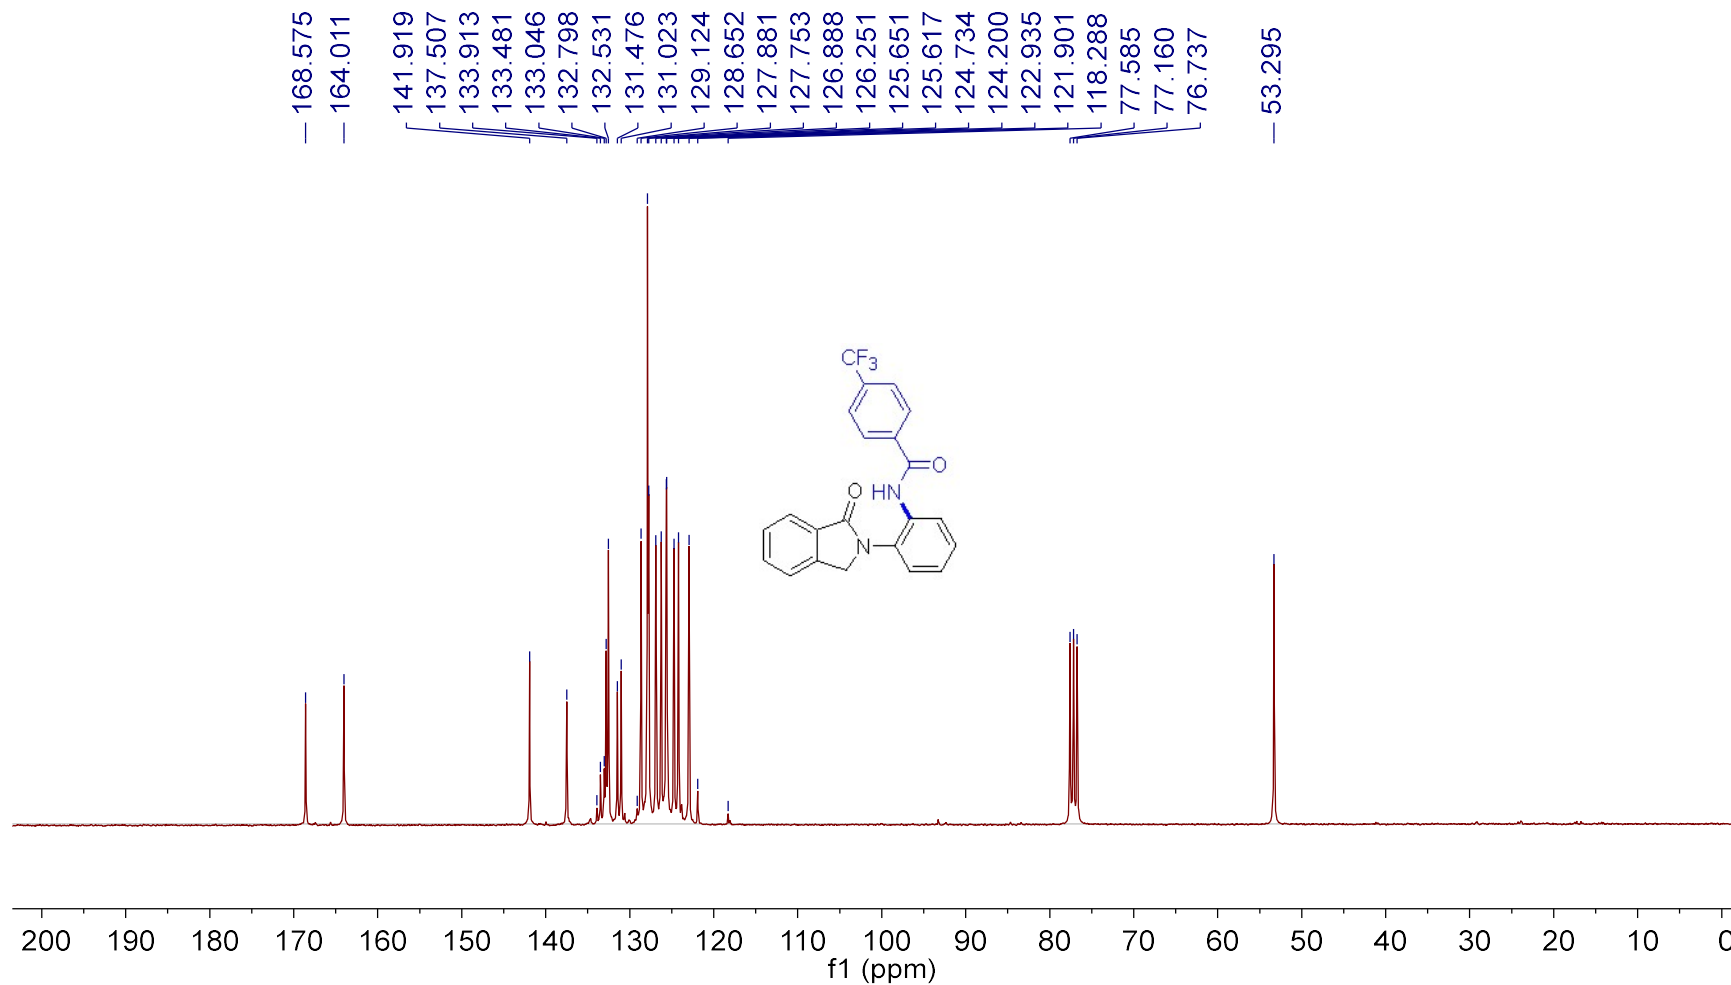

$^{13}\text{C}\{^1\text{H}\}$  NMR spectrum of **31**.

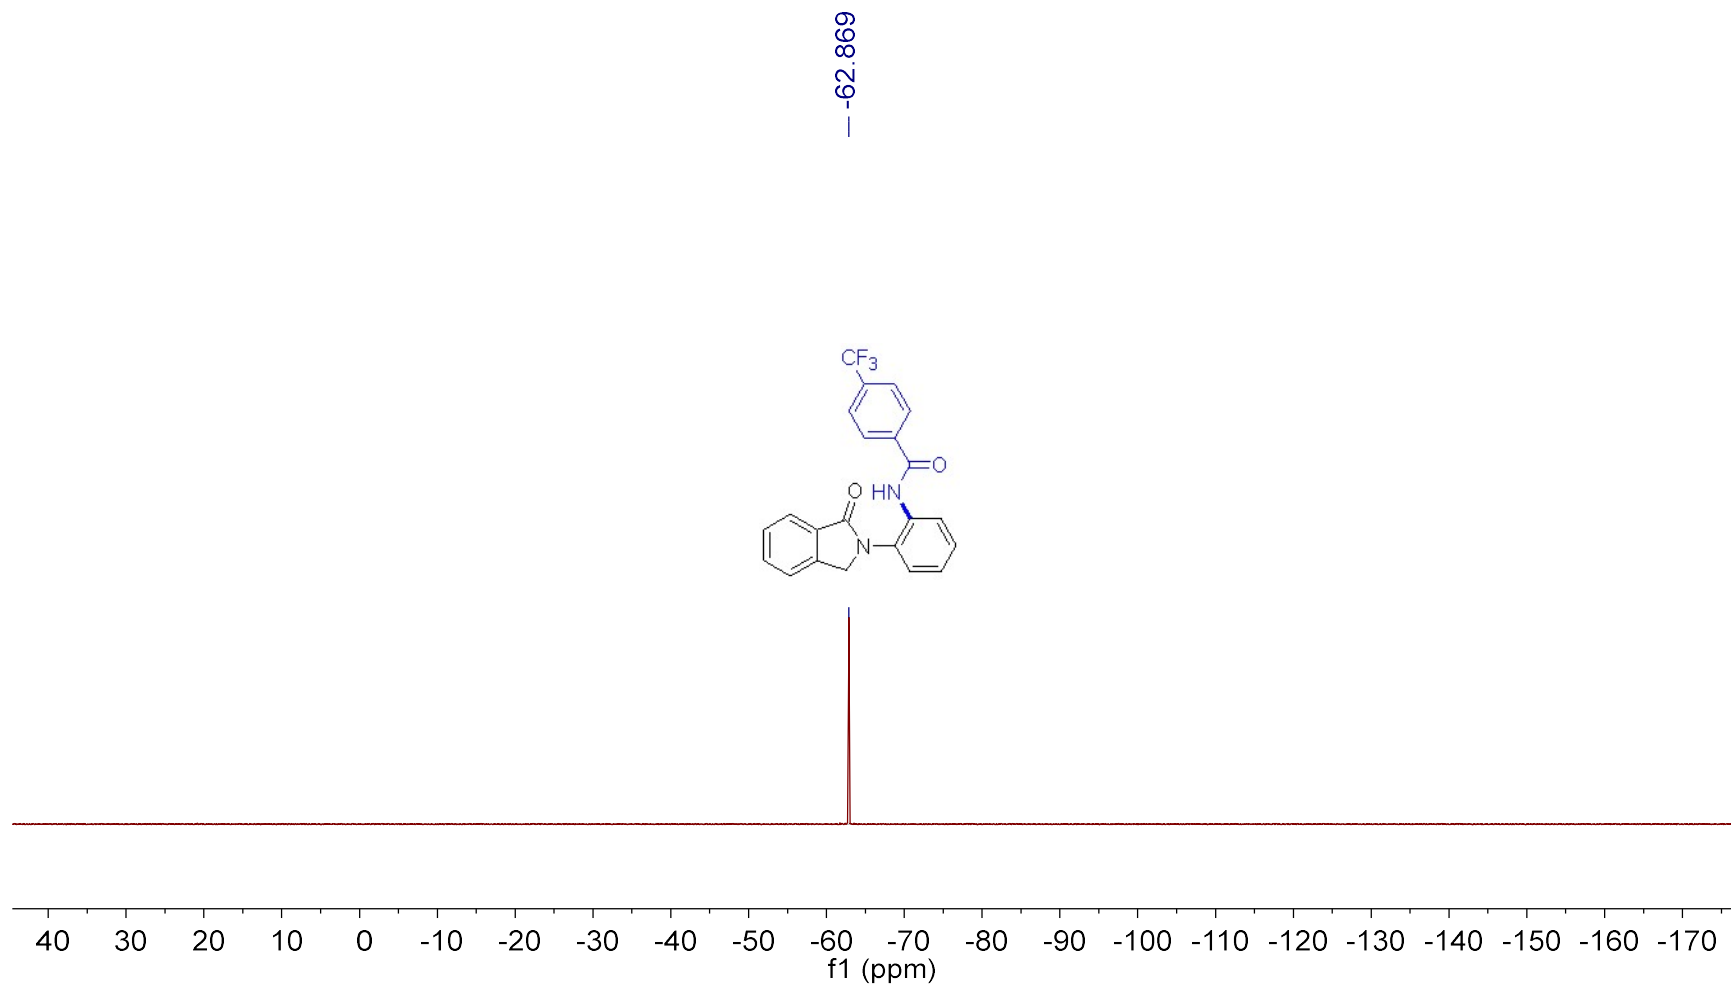

$^{19}\text{F}\{^1\text{H}\}$  NMR spectrum of **31**.

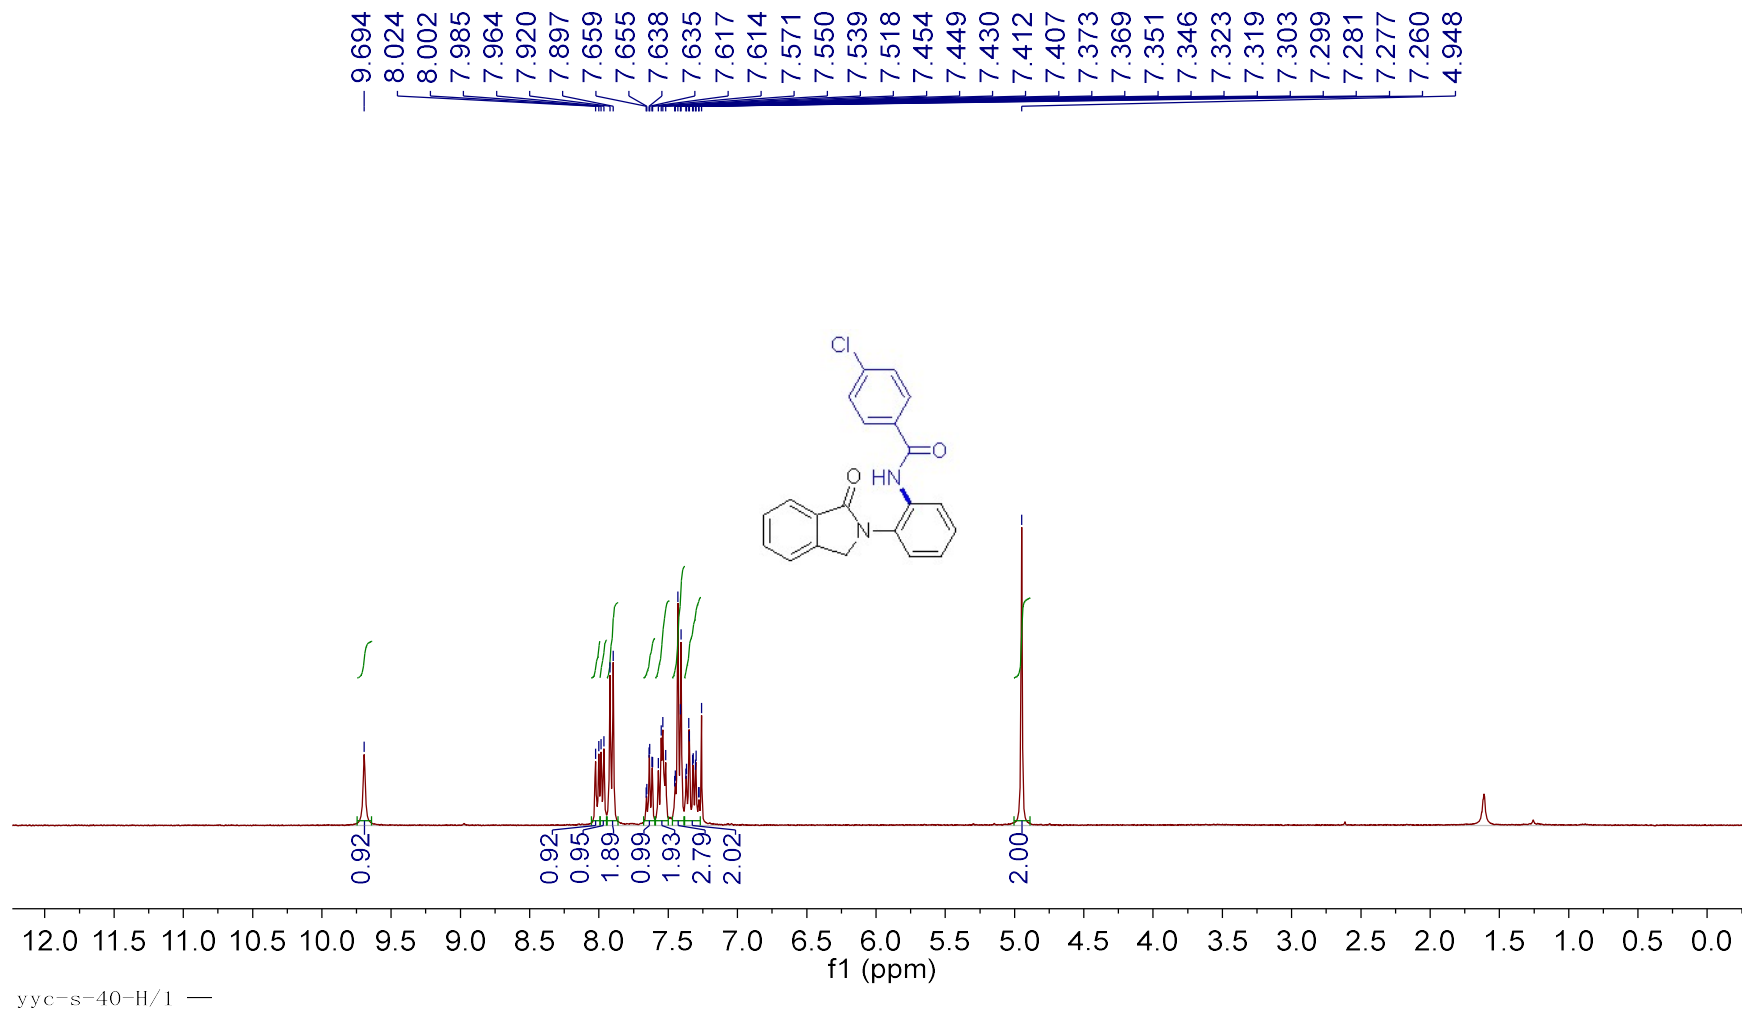

<sup>1</sup>H NMR spectrum of **3m**.

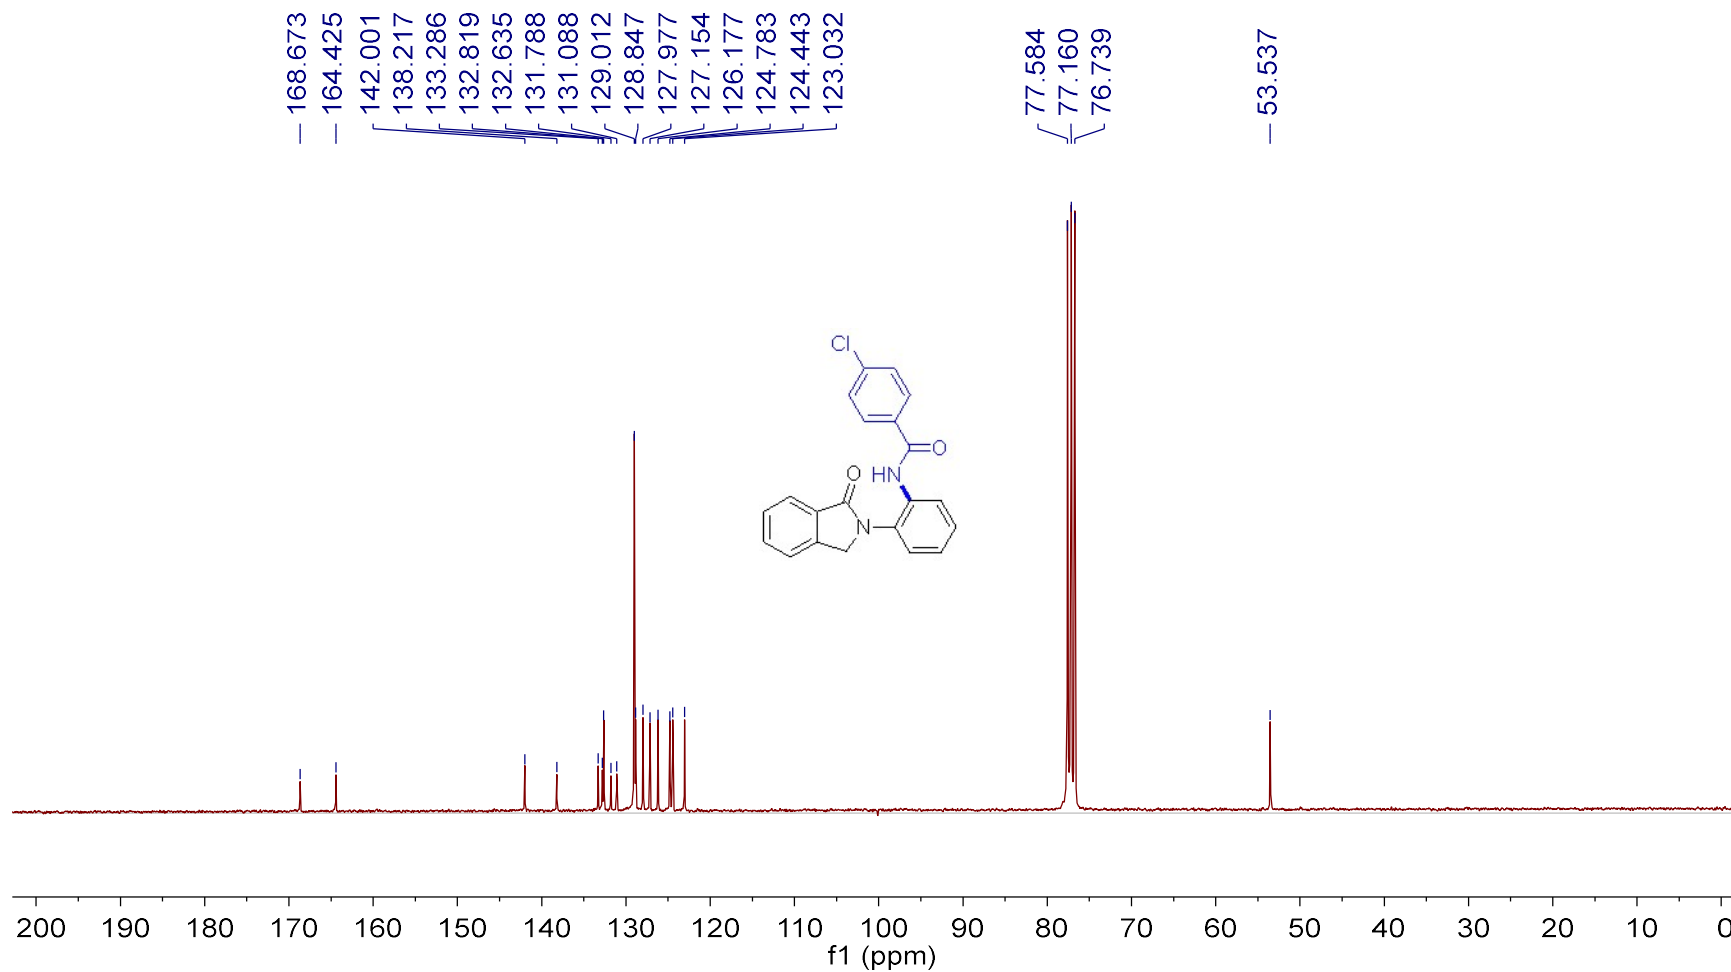

yyc-s-40-C-re. 11. fid

$^{13}\text{C}\{^1\text{H}\}$  NMR spectrum of **3m**.

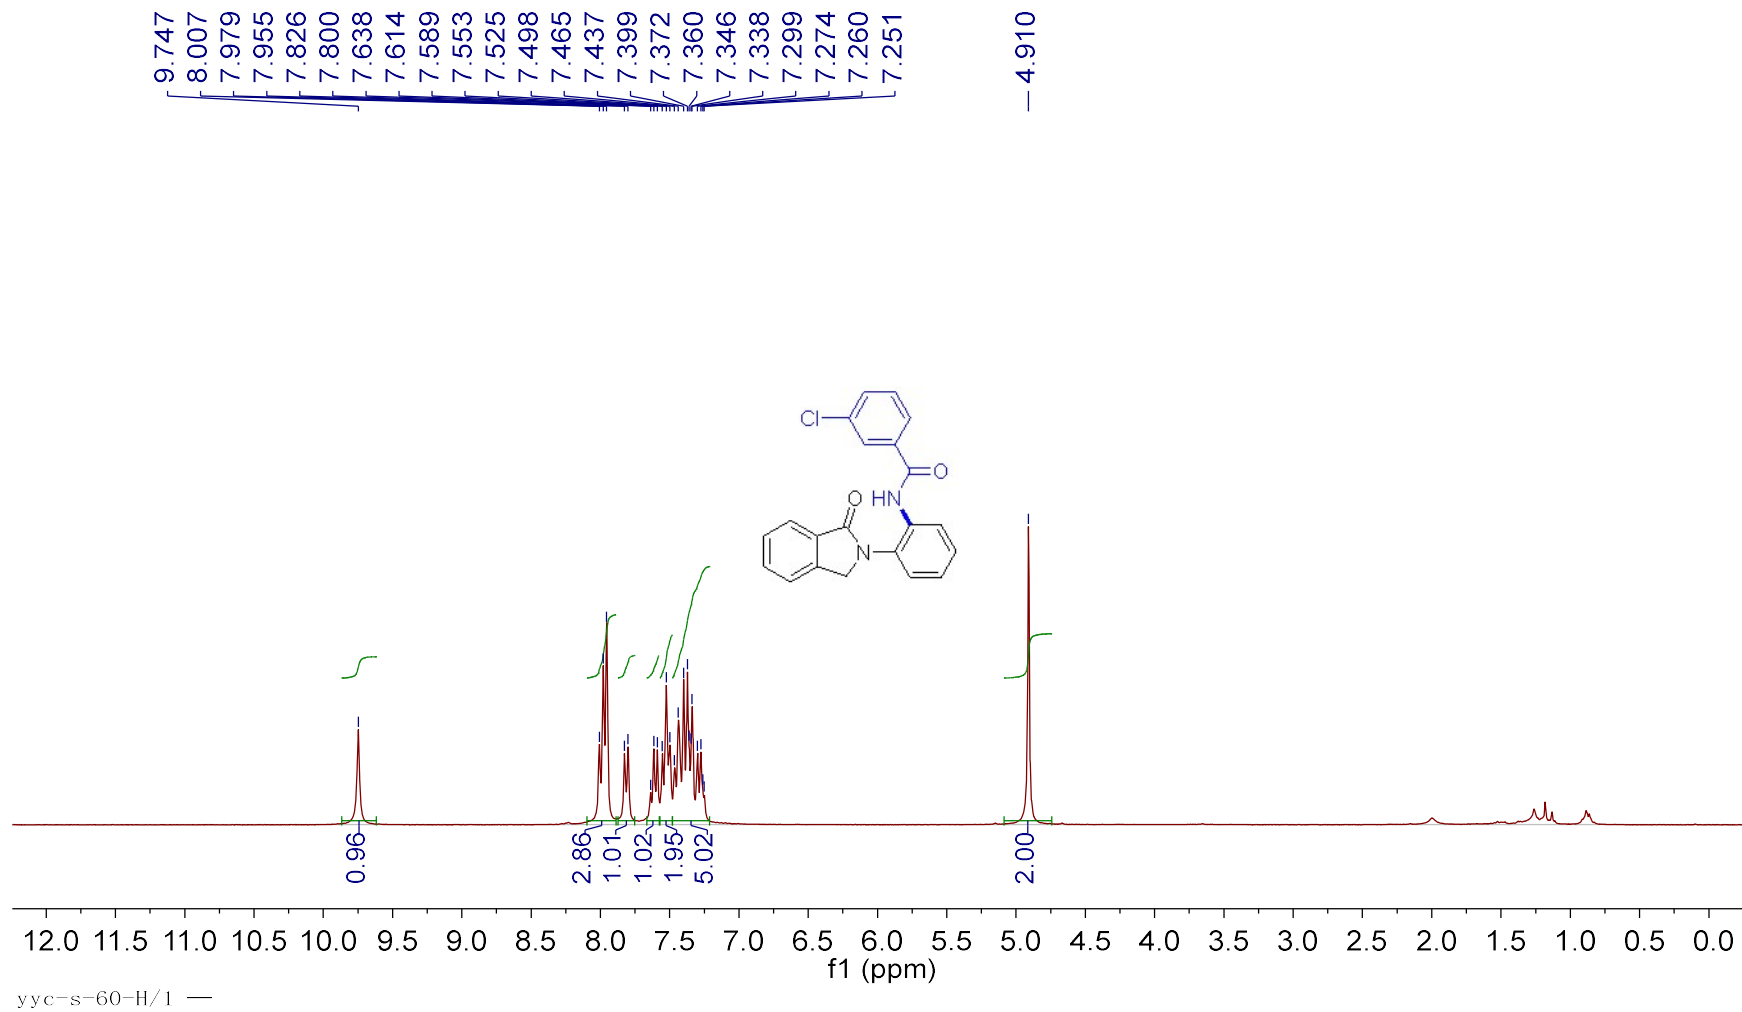

<sup>1</sup>H NMR spectrum of **3n**.

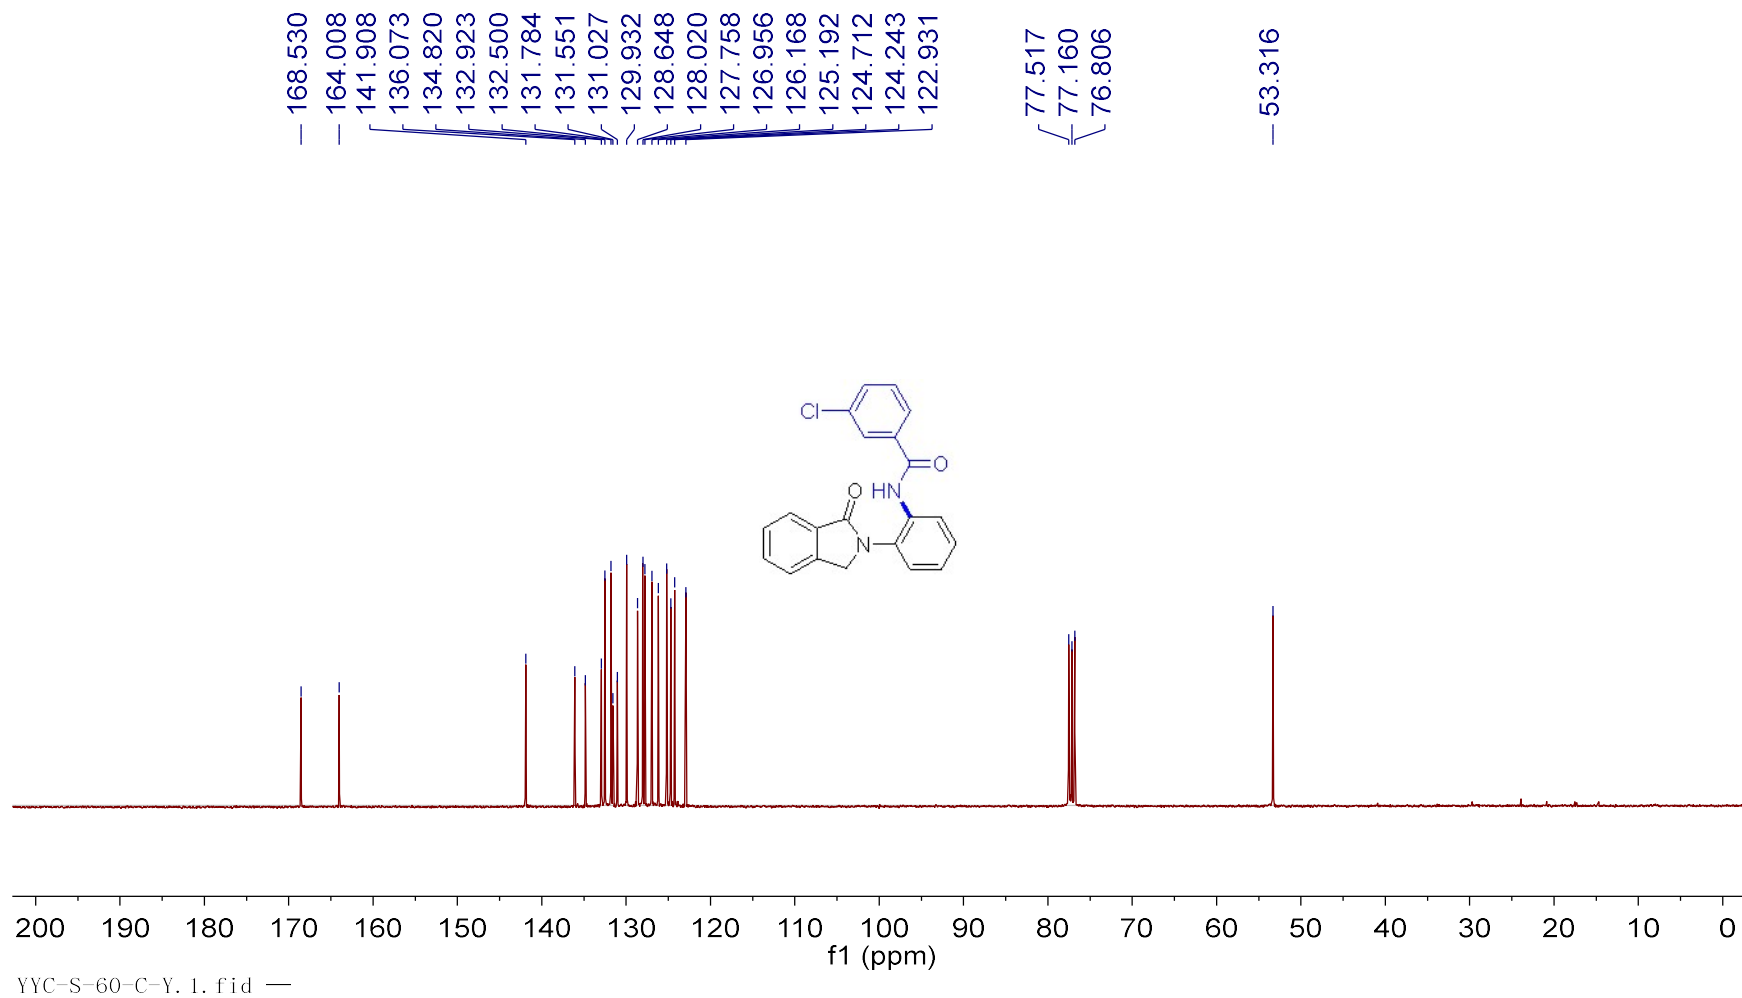

$^{13}\text{C}\{^1\text{H}\}$  NMR spectrum of **3n**.

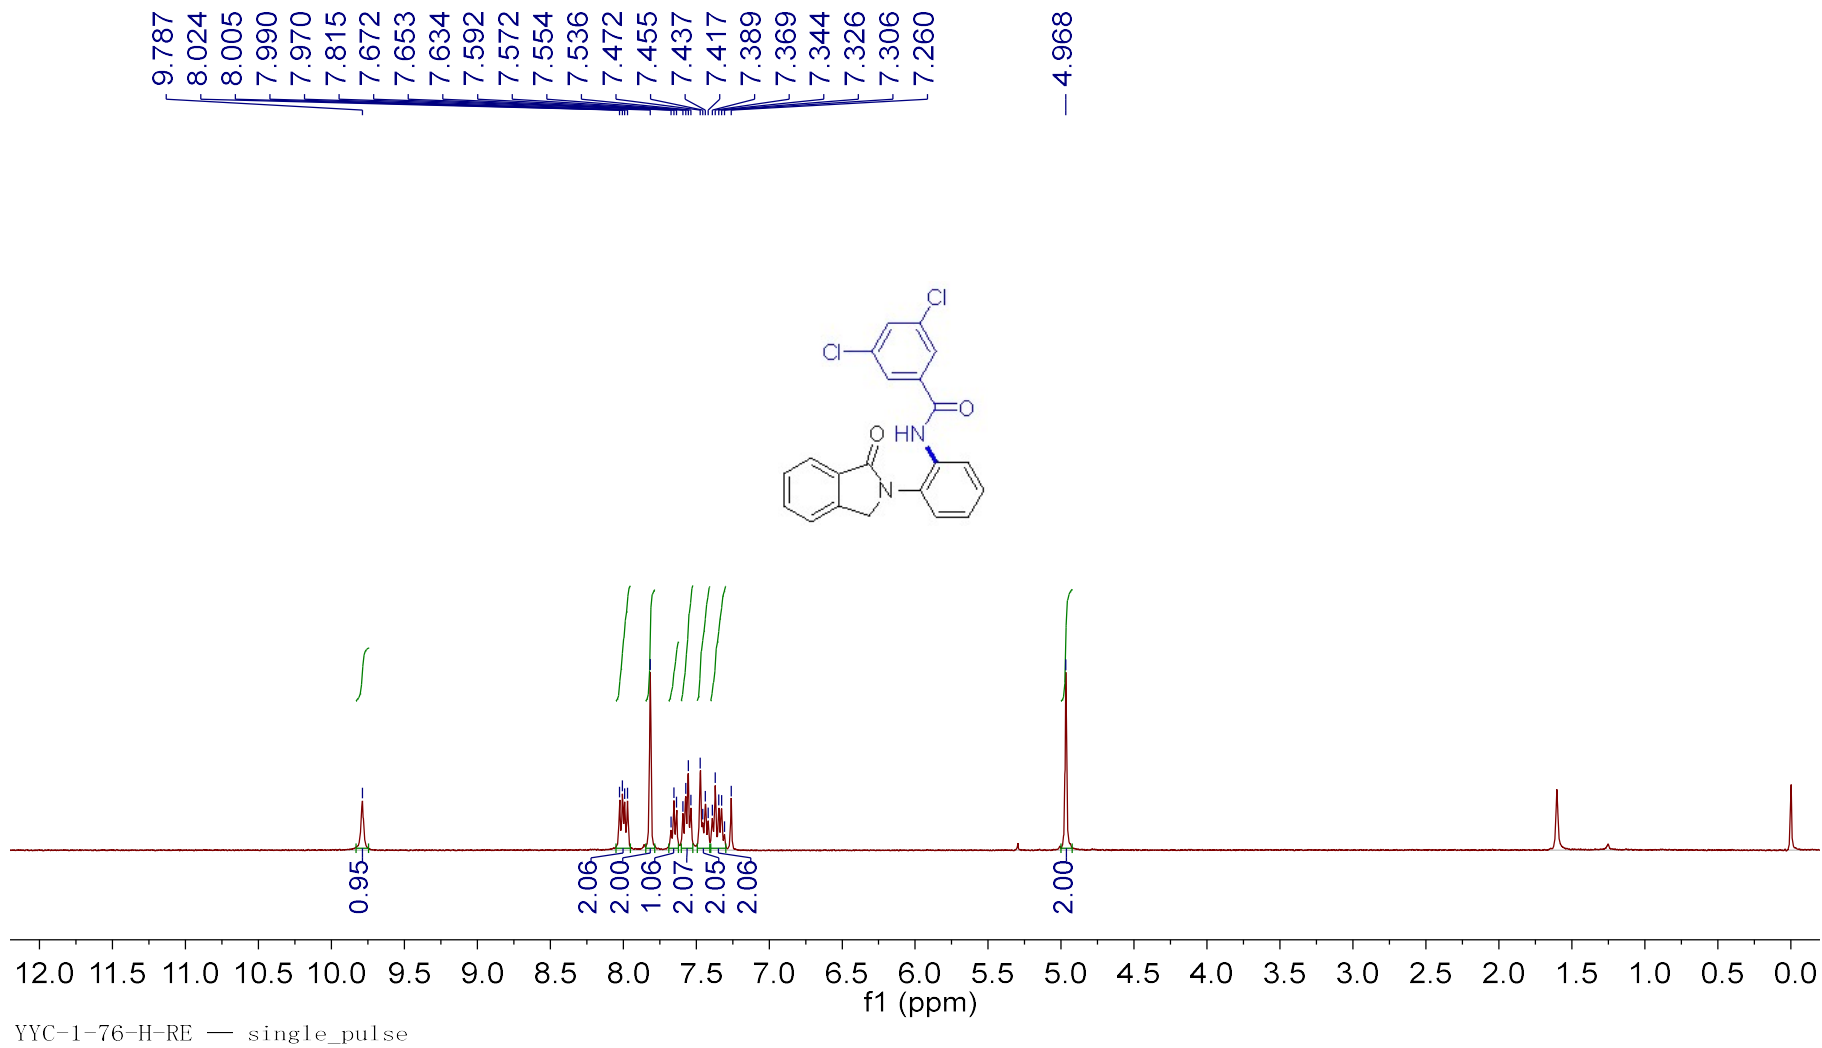

<sup>1</sup>H NMR spectrum of **3o**.



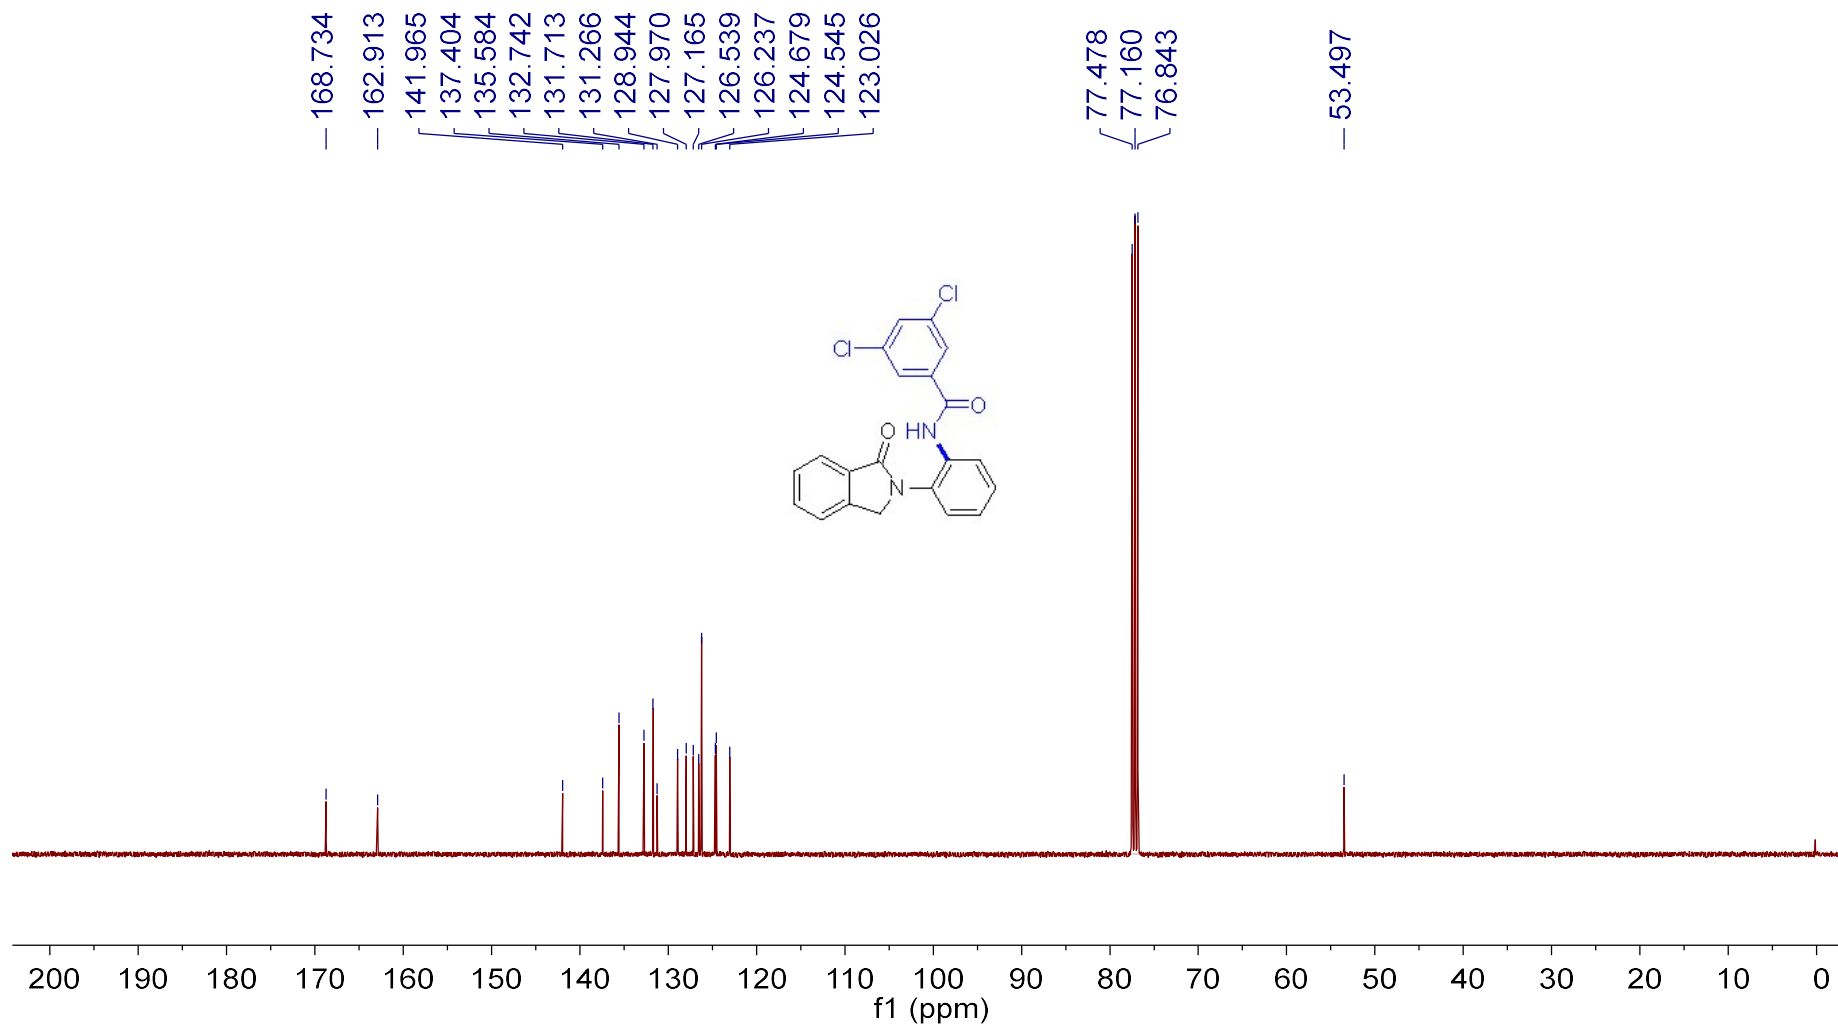

YYC-1-76-C-r — single pulse decoupled gated NOE

$^{13}\text{C}\{^1\text{H}\}$  NMR spectrum of **3o**.

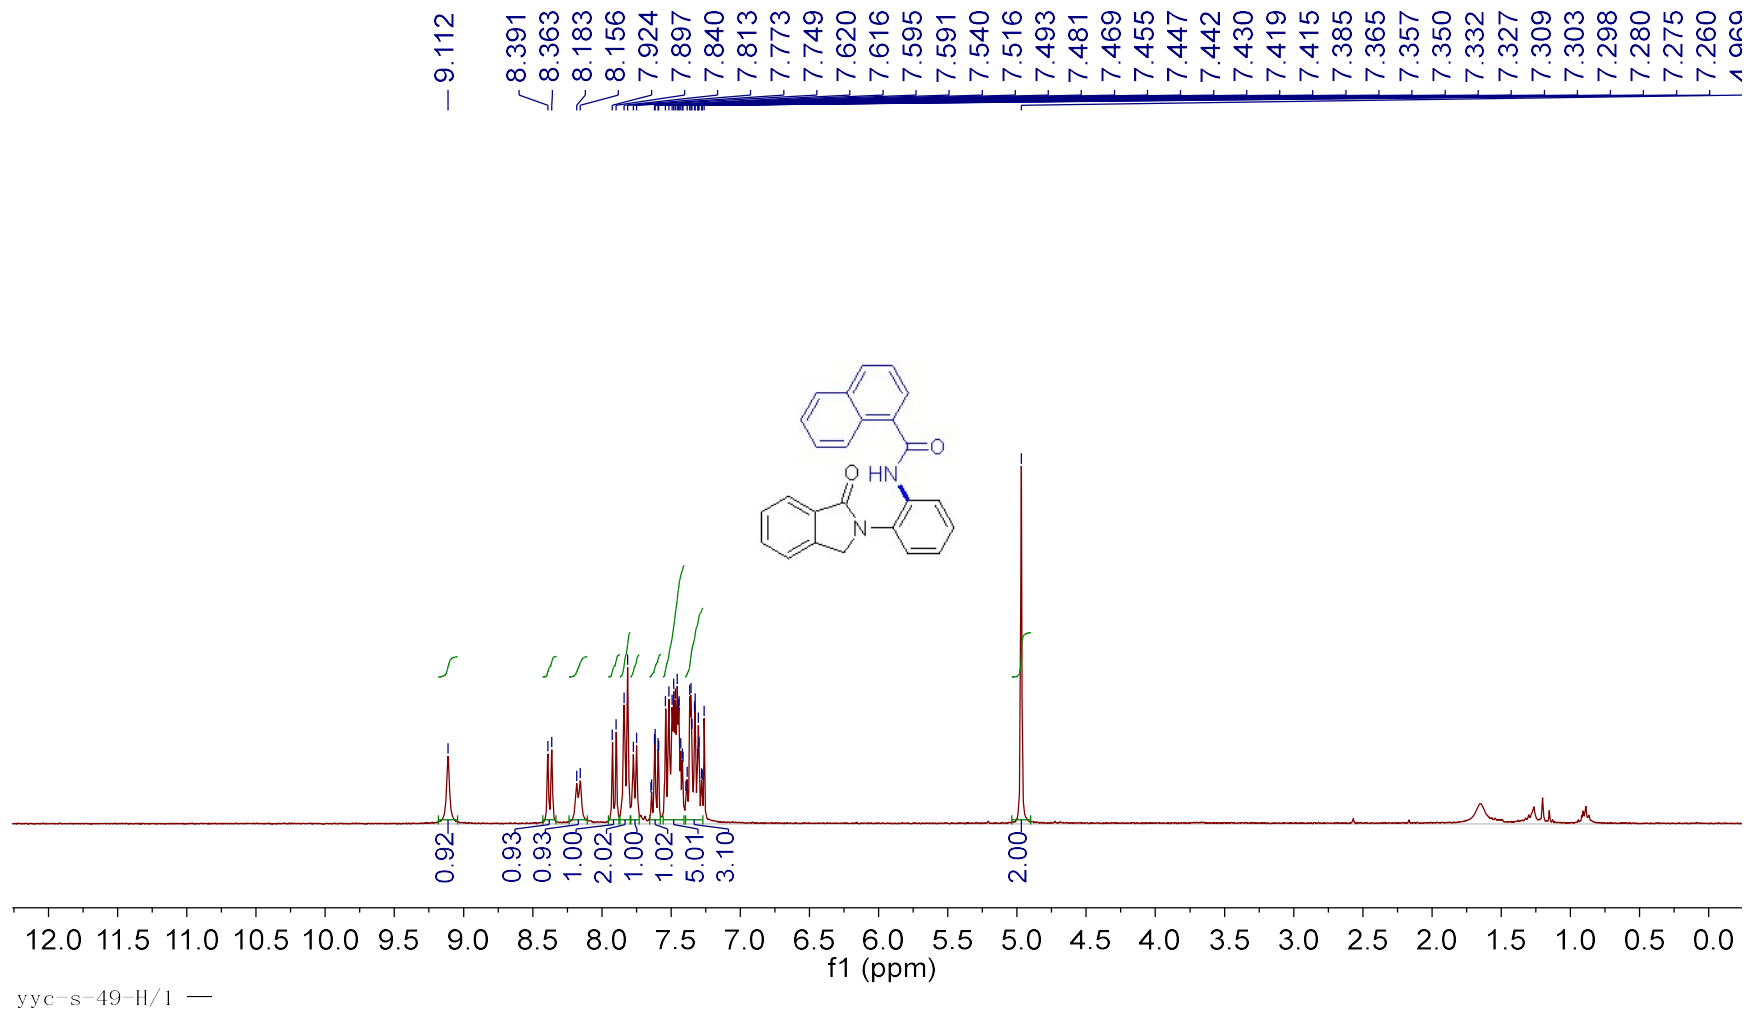

<sup>1</sup>H NMR spectrum of **3p**.

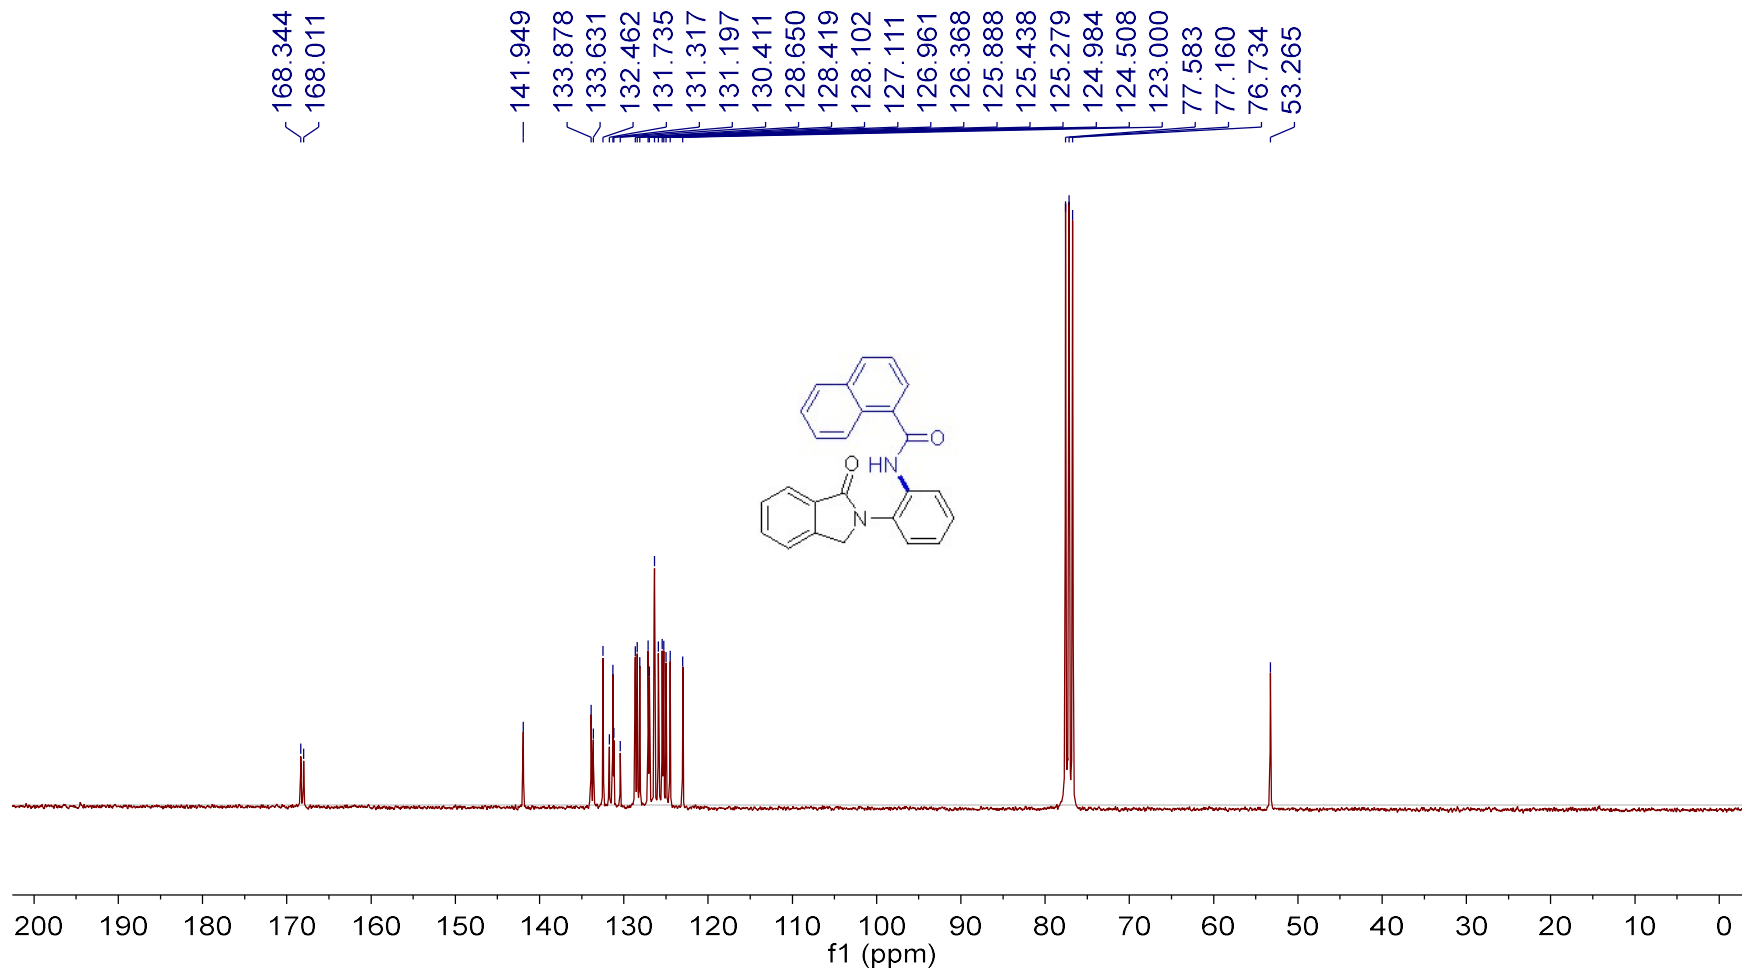

yyc-s-49-C-re. 13. fid

$^{13}\text{C}\{^1\text{H}\}$  NMR spectrum of **3p**.

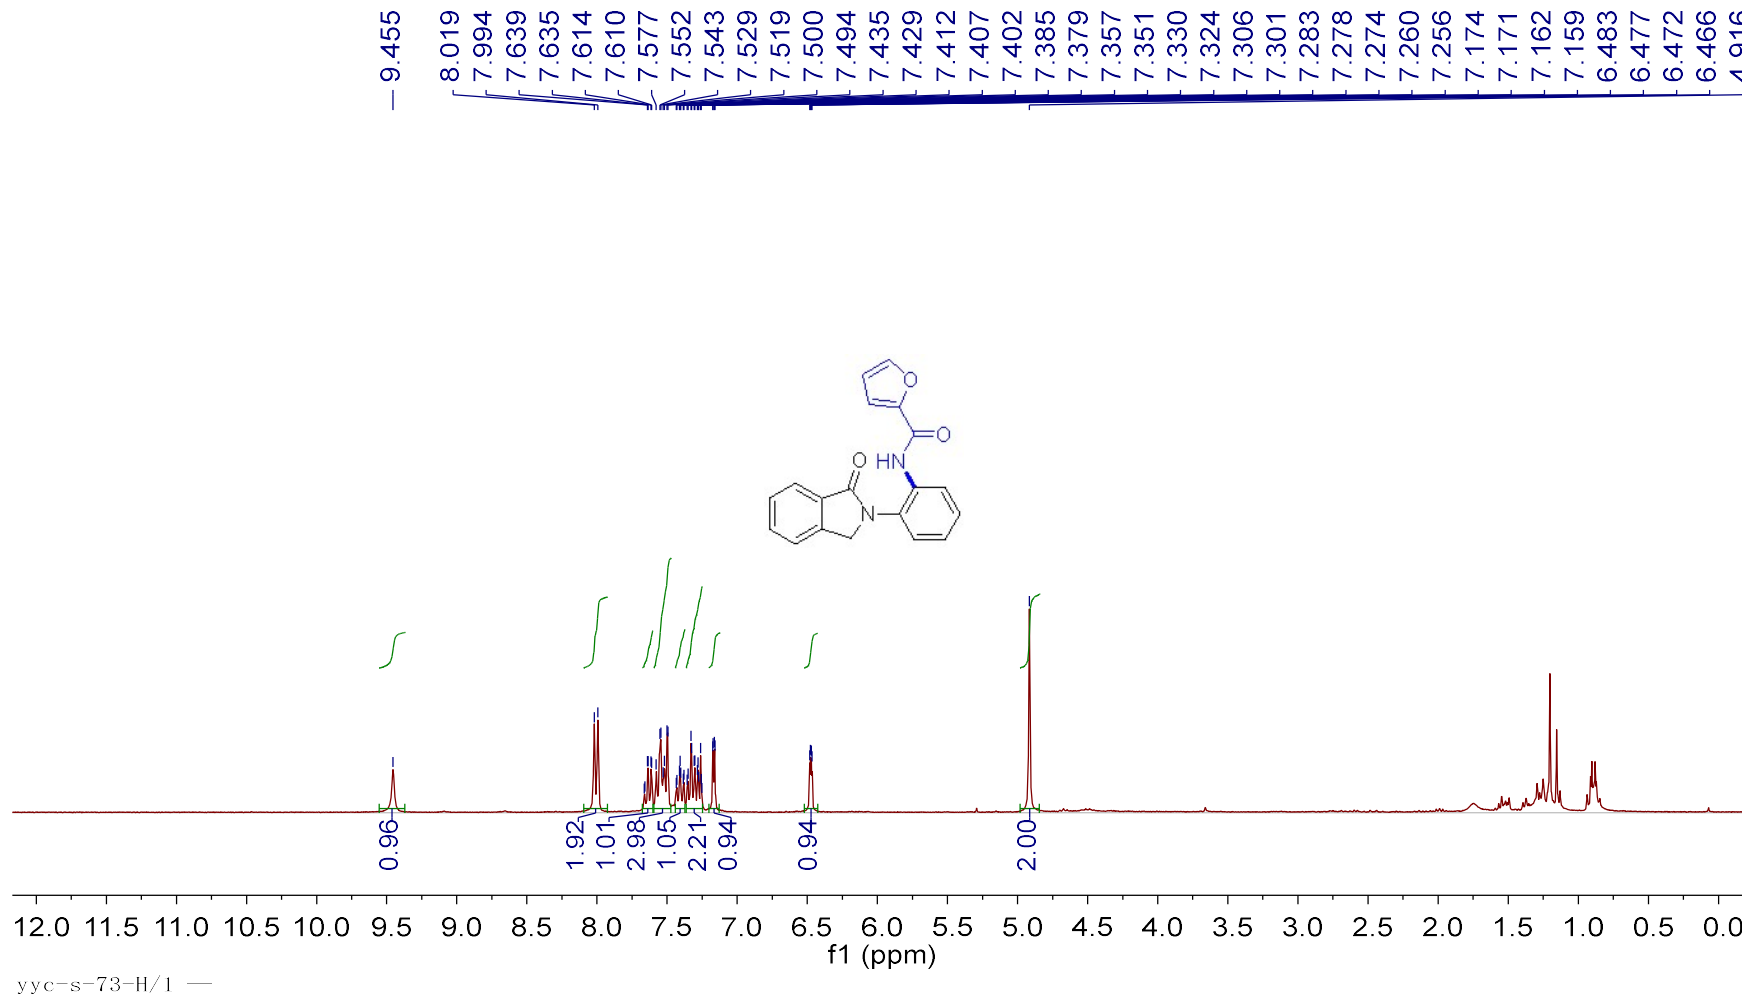

<sup>1</sup>H NMR spectrum of 3q.

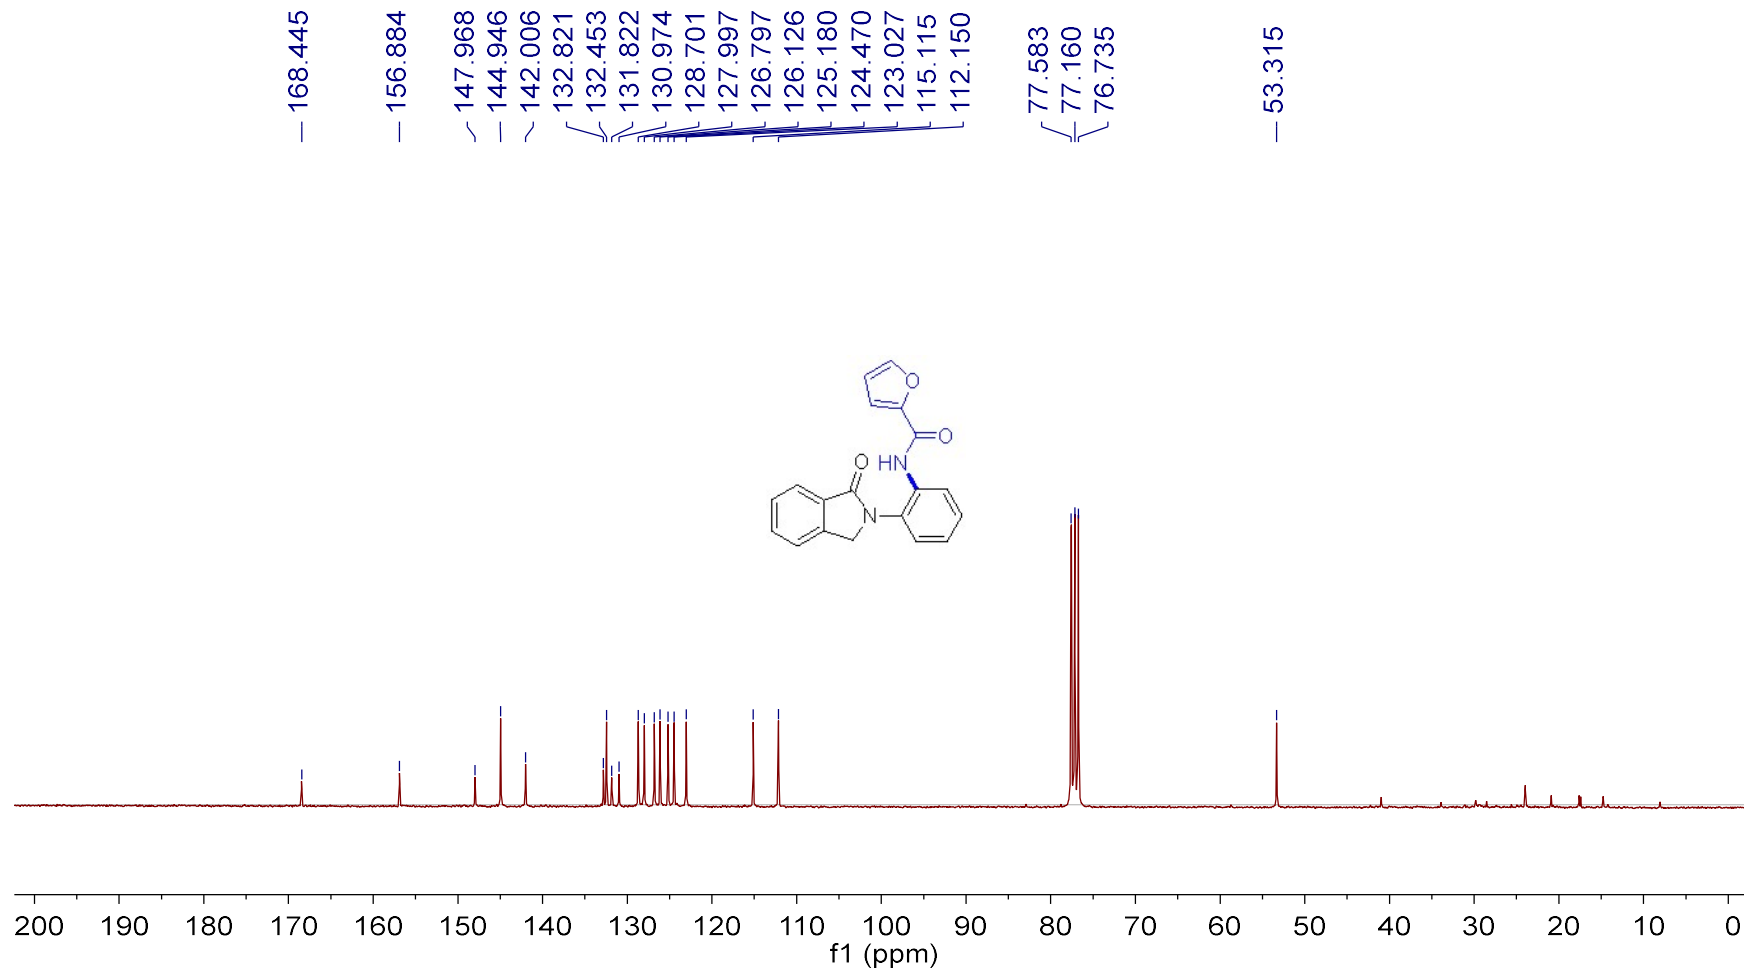

YYC-S-73-C. 13. fid

$^{13}\text{C}\{^1\text{H}\}$  NMR spectrum of **3q**.

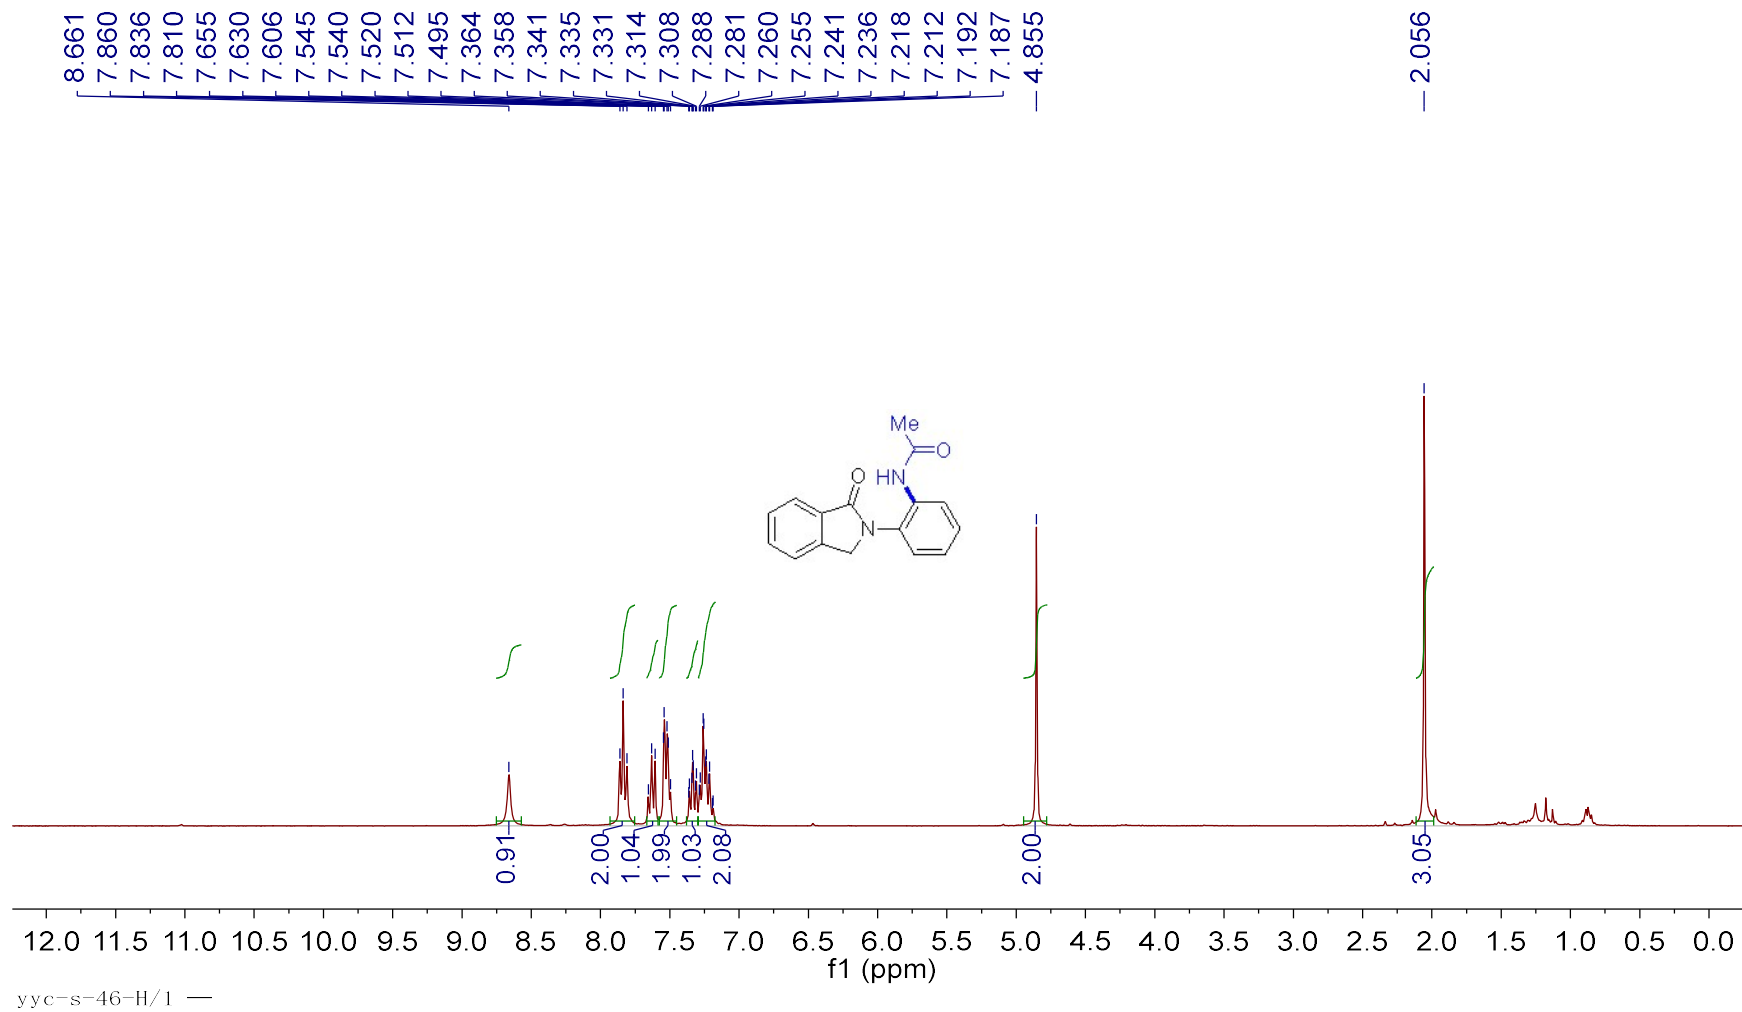

<sup>1</sup>H NMR spectrum of **3r**.

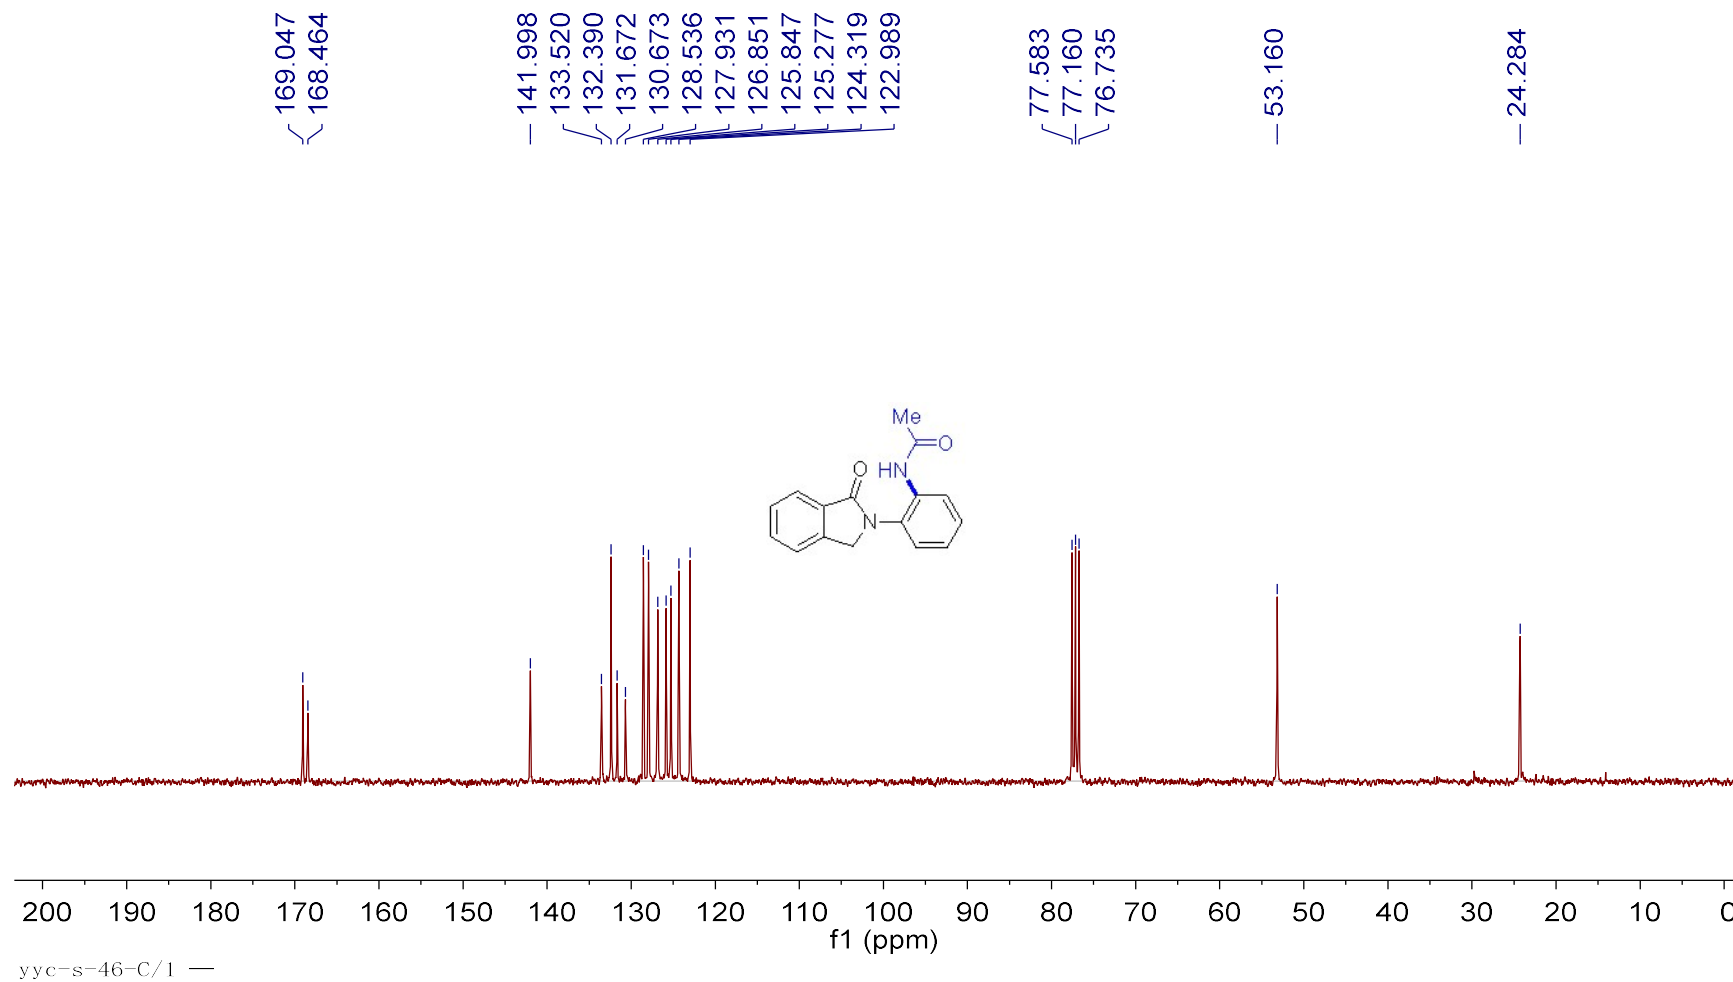

$^{13}\text{C}\{^1\text{H}\}$  NMR spectrum of **3r**.

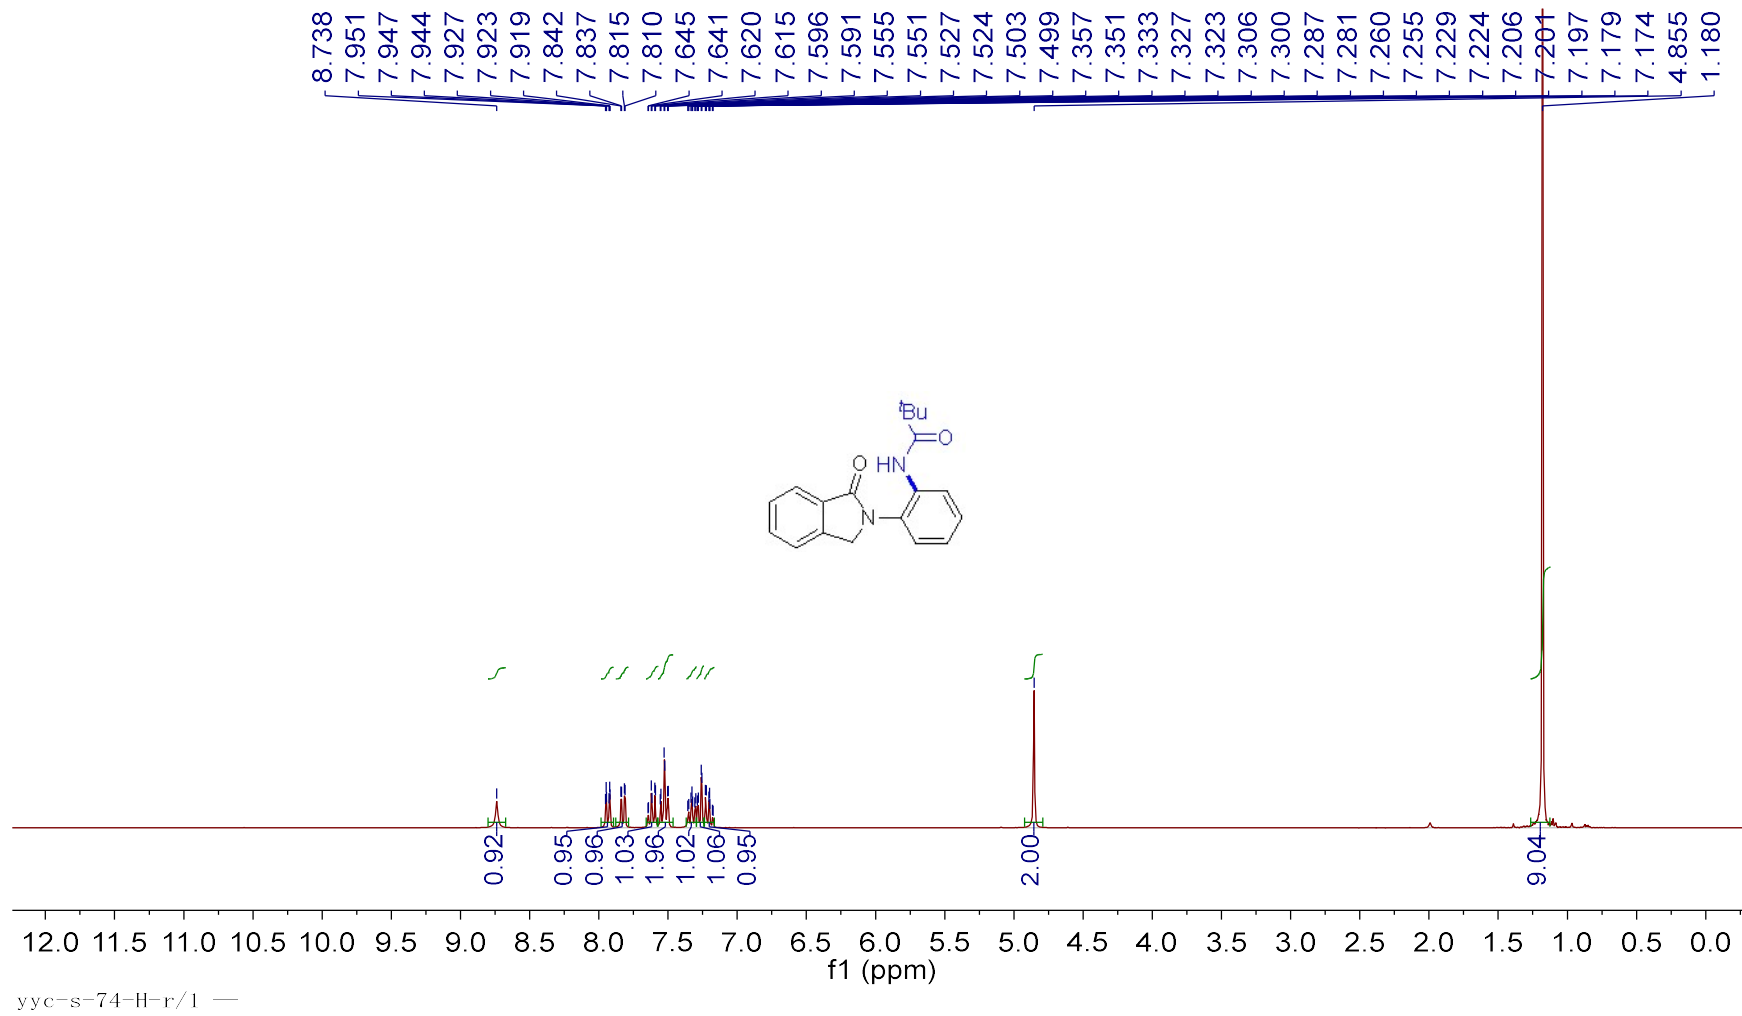

<sup>1</sup>H NMR spectrum of **3s**.



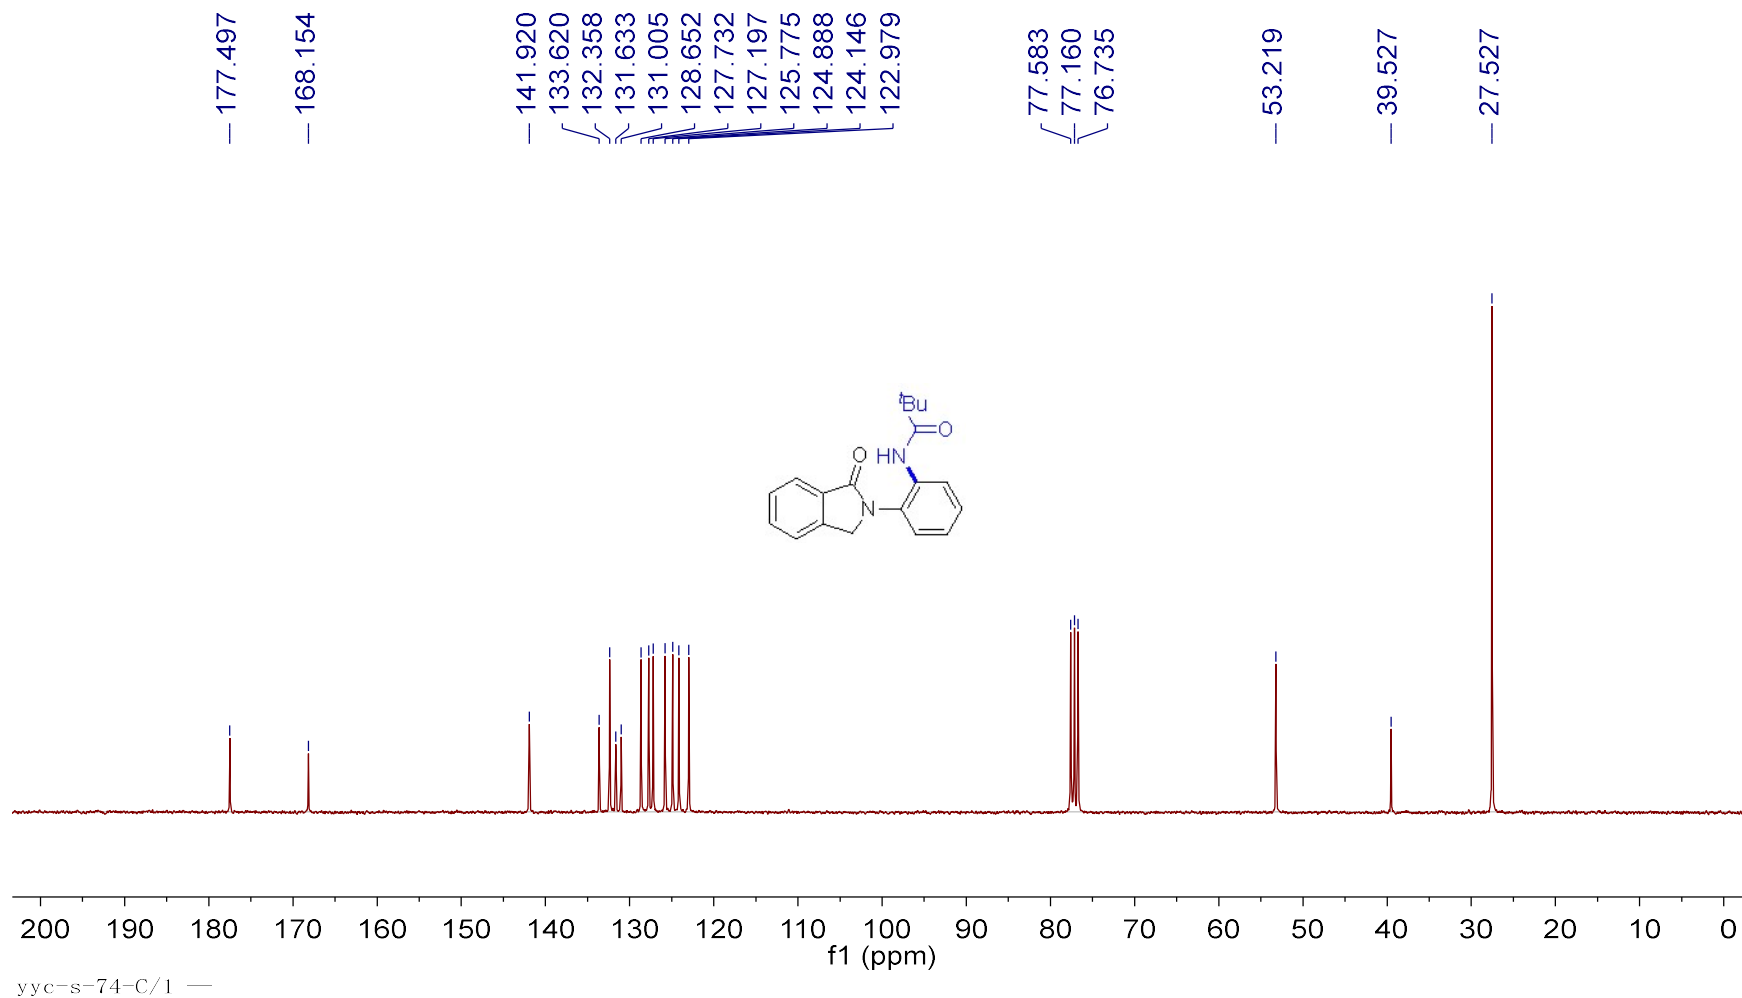

$^{13}\text{C}\{^1\text{H}\}$  NMR spectrum of **3s**.

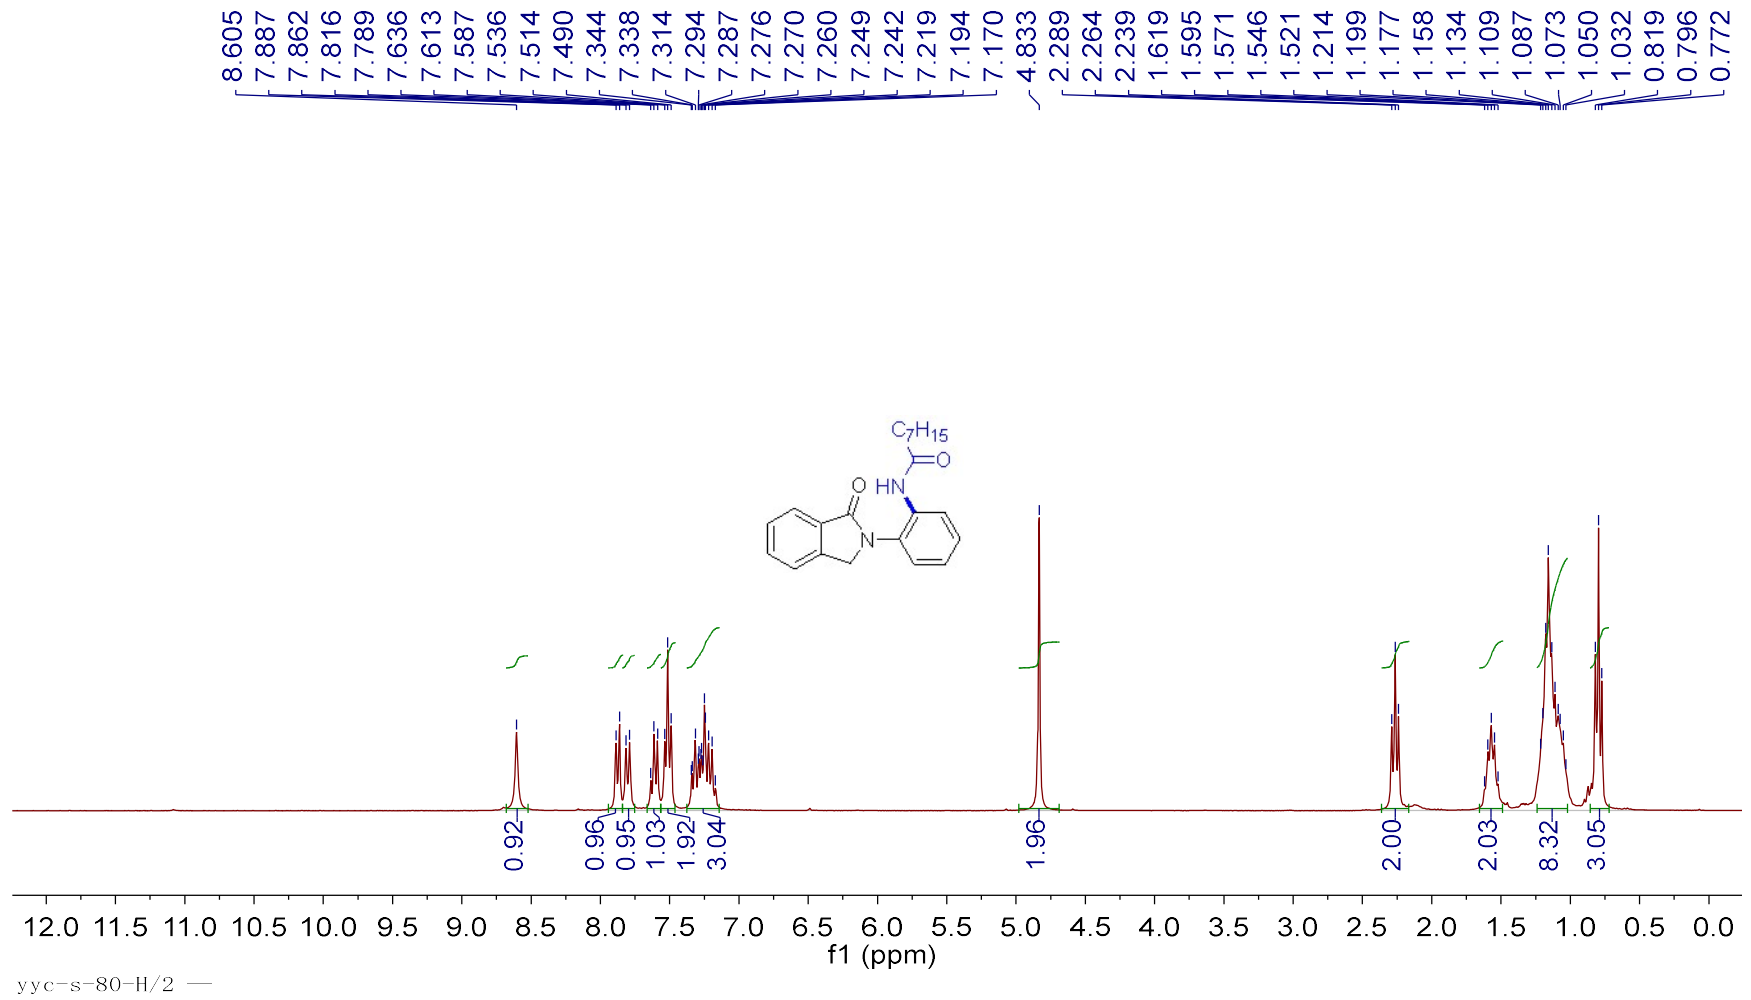

<sup>1</sup>H NMR spectrum of **3t**.

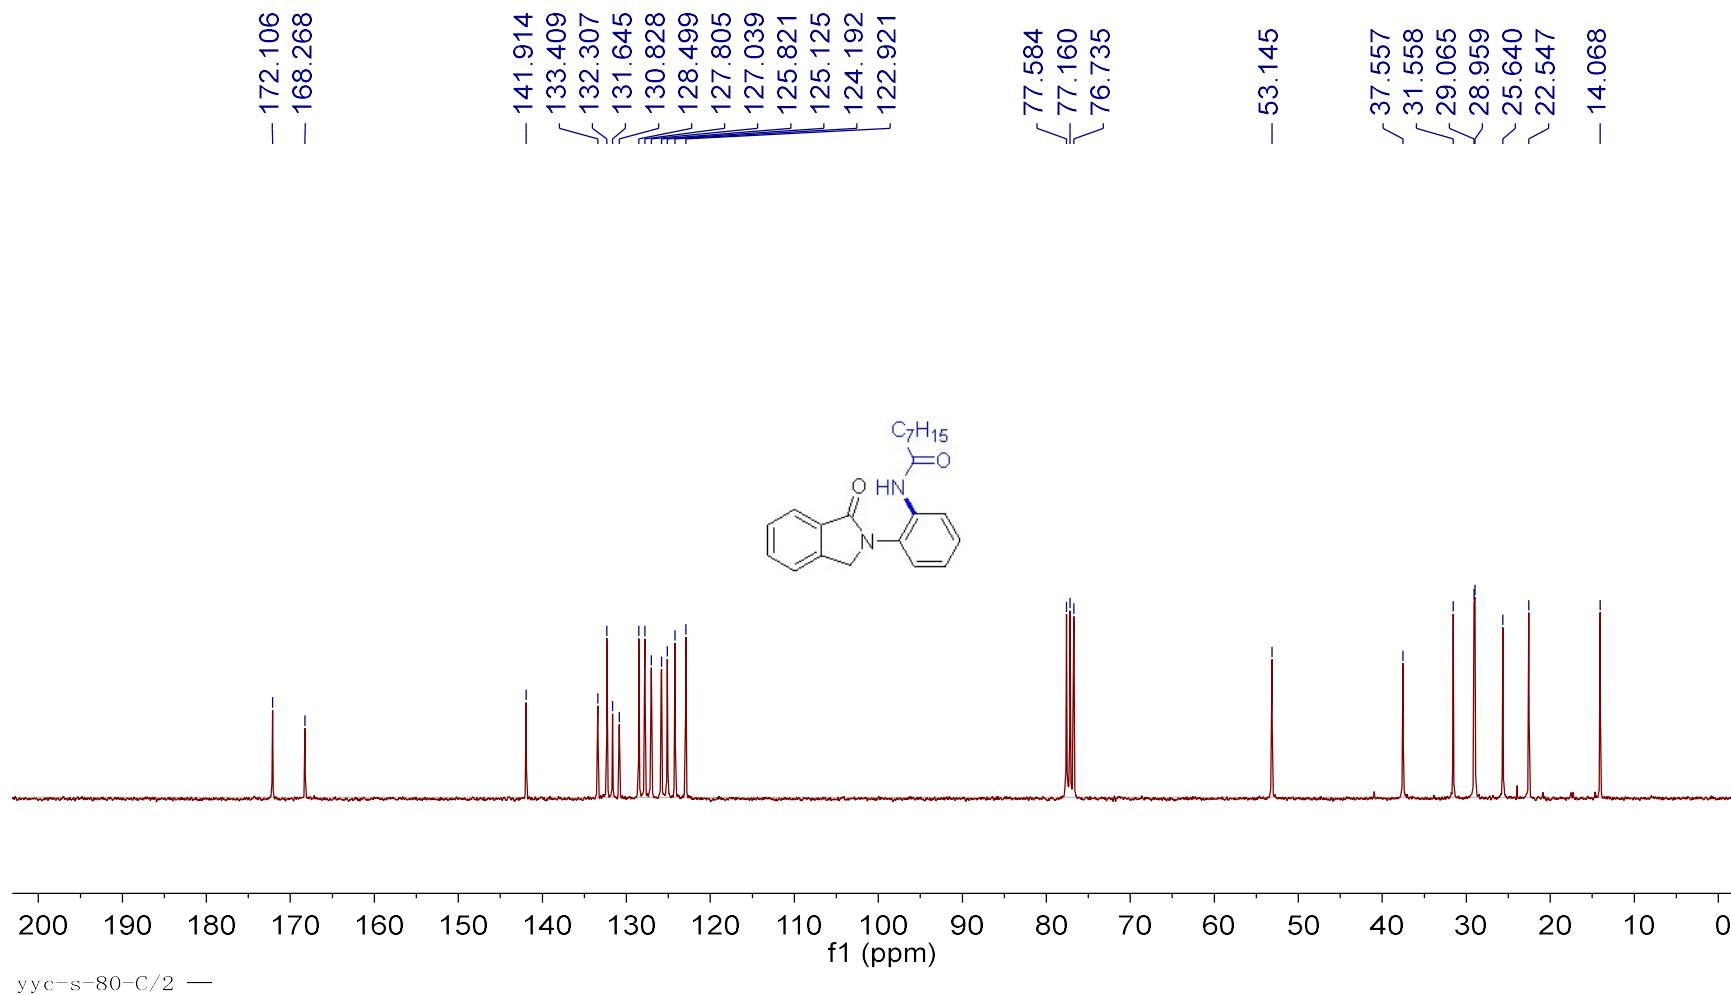

$^{13}\text{C}\{^1\text{H}\}$  NMR spectrum of **3t**.

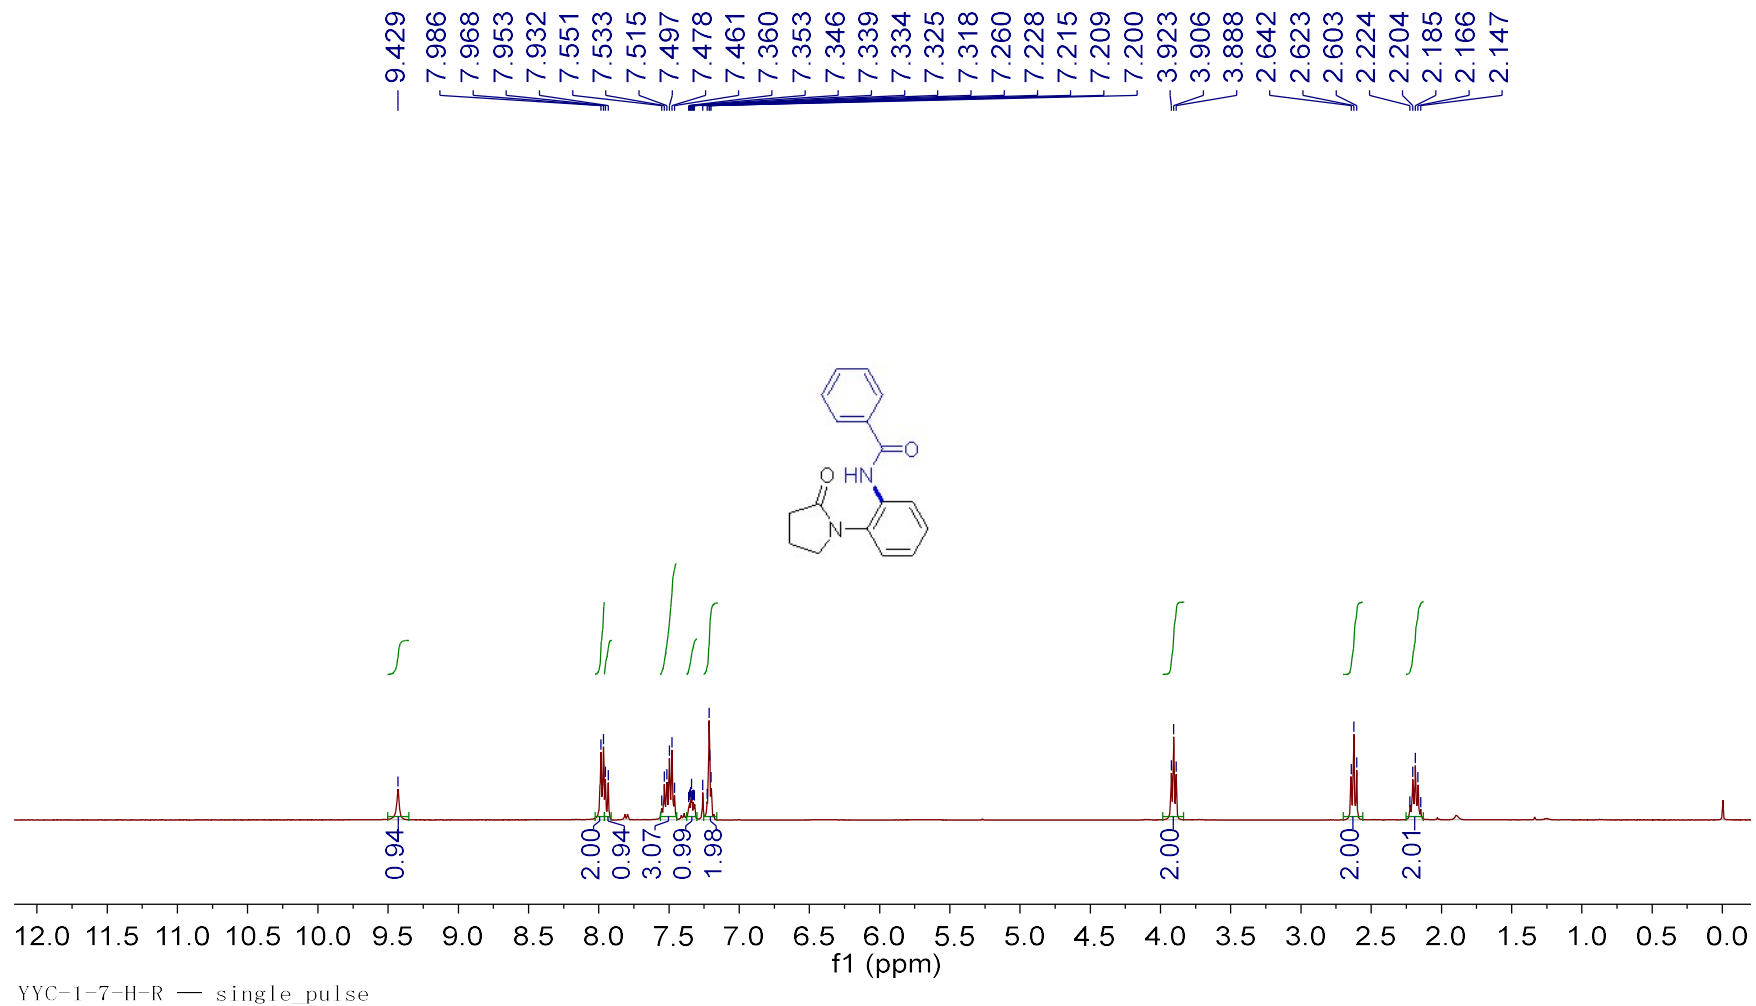

<sup>1</sup>H NMR spectrum of 4.

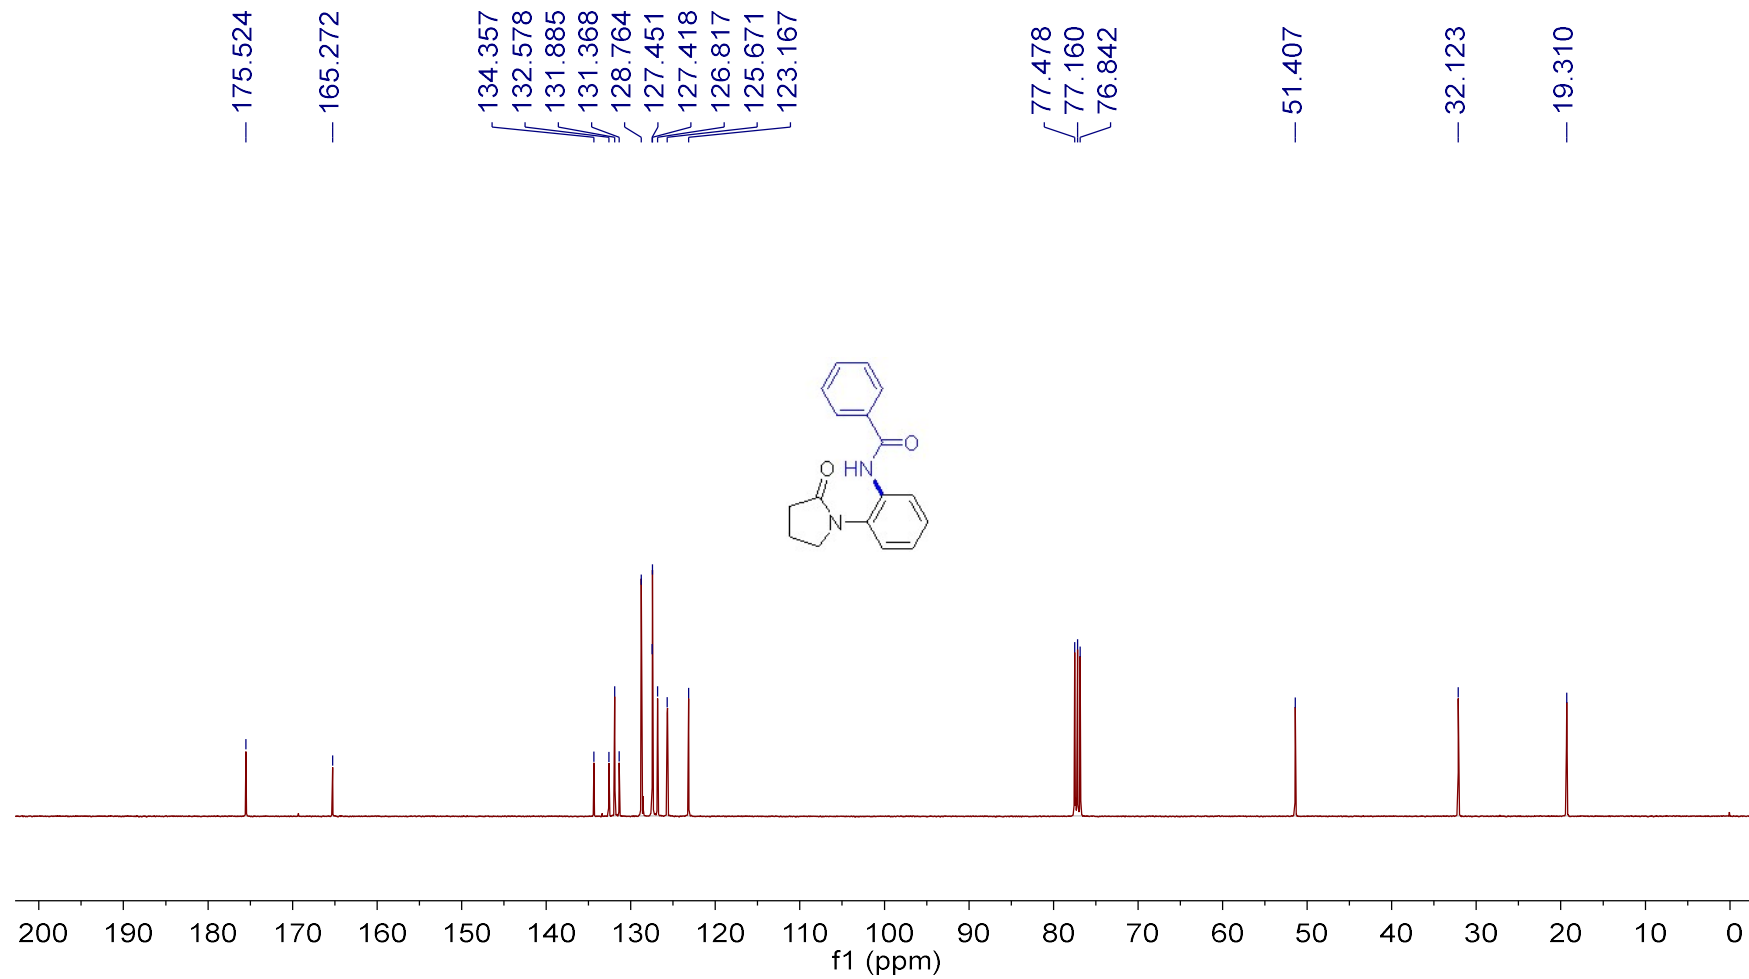

$^{13}\text{C}\{^1\text{H}\}$  NMR spectrum of 4.

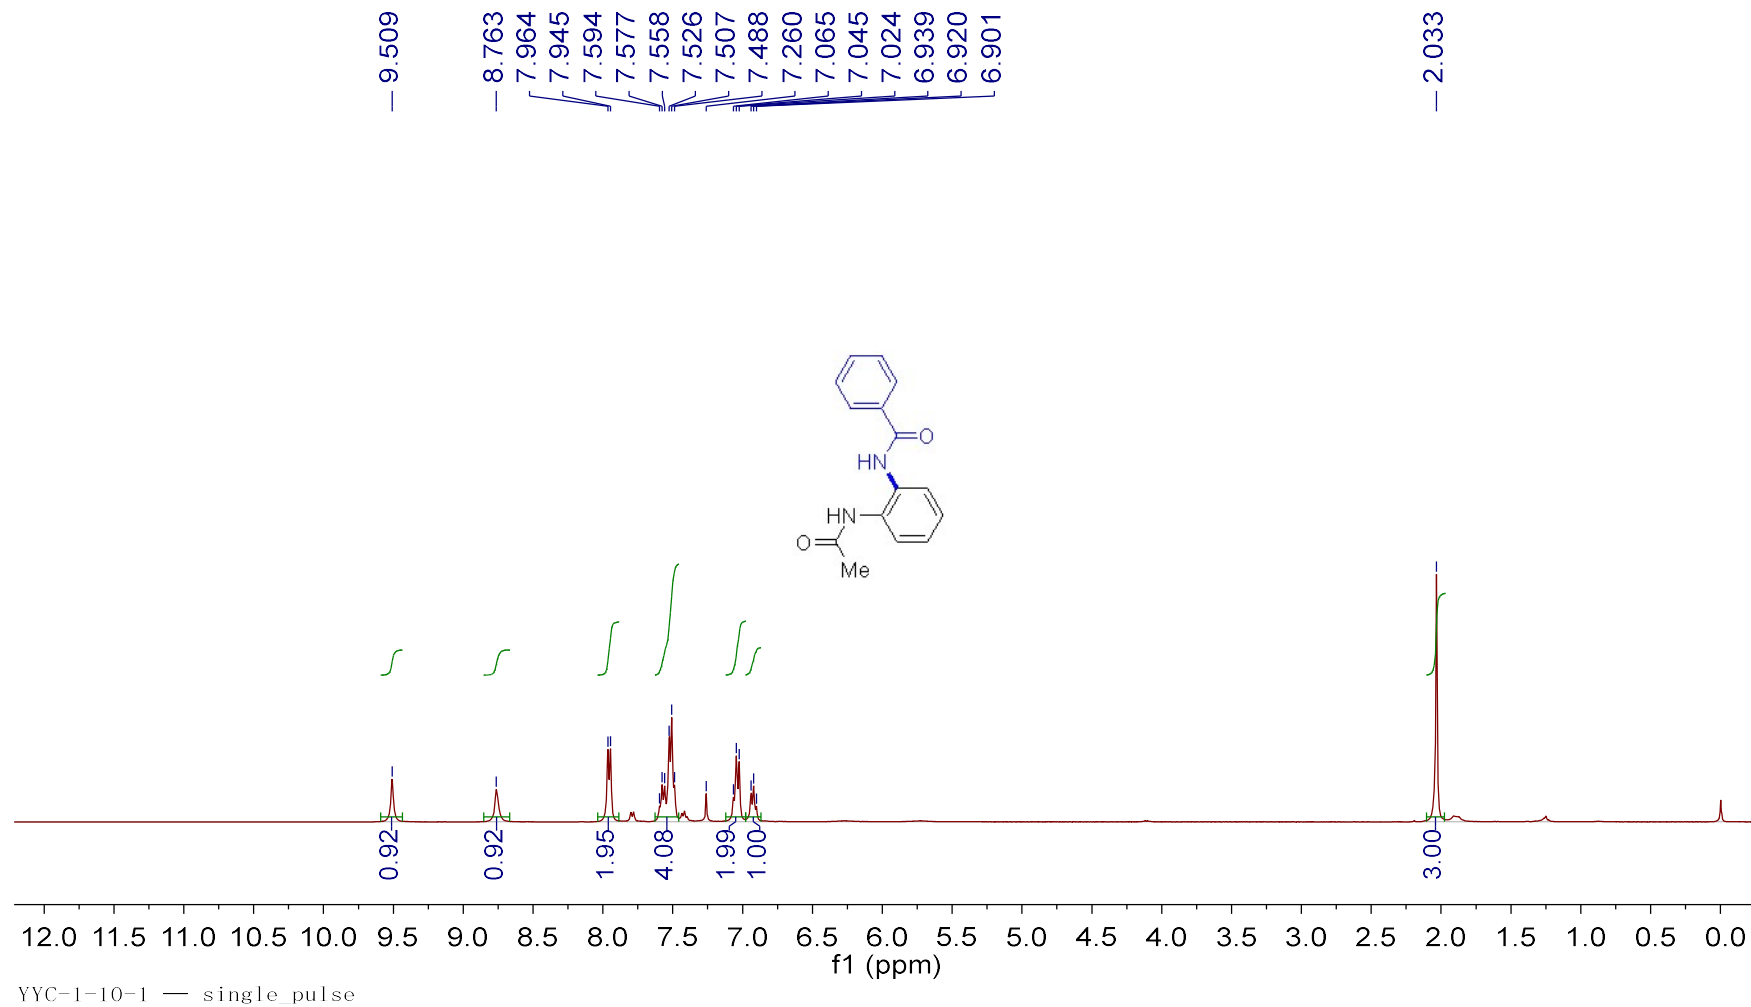

<sup>1</sup>H NMR spectrum of **5**.

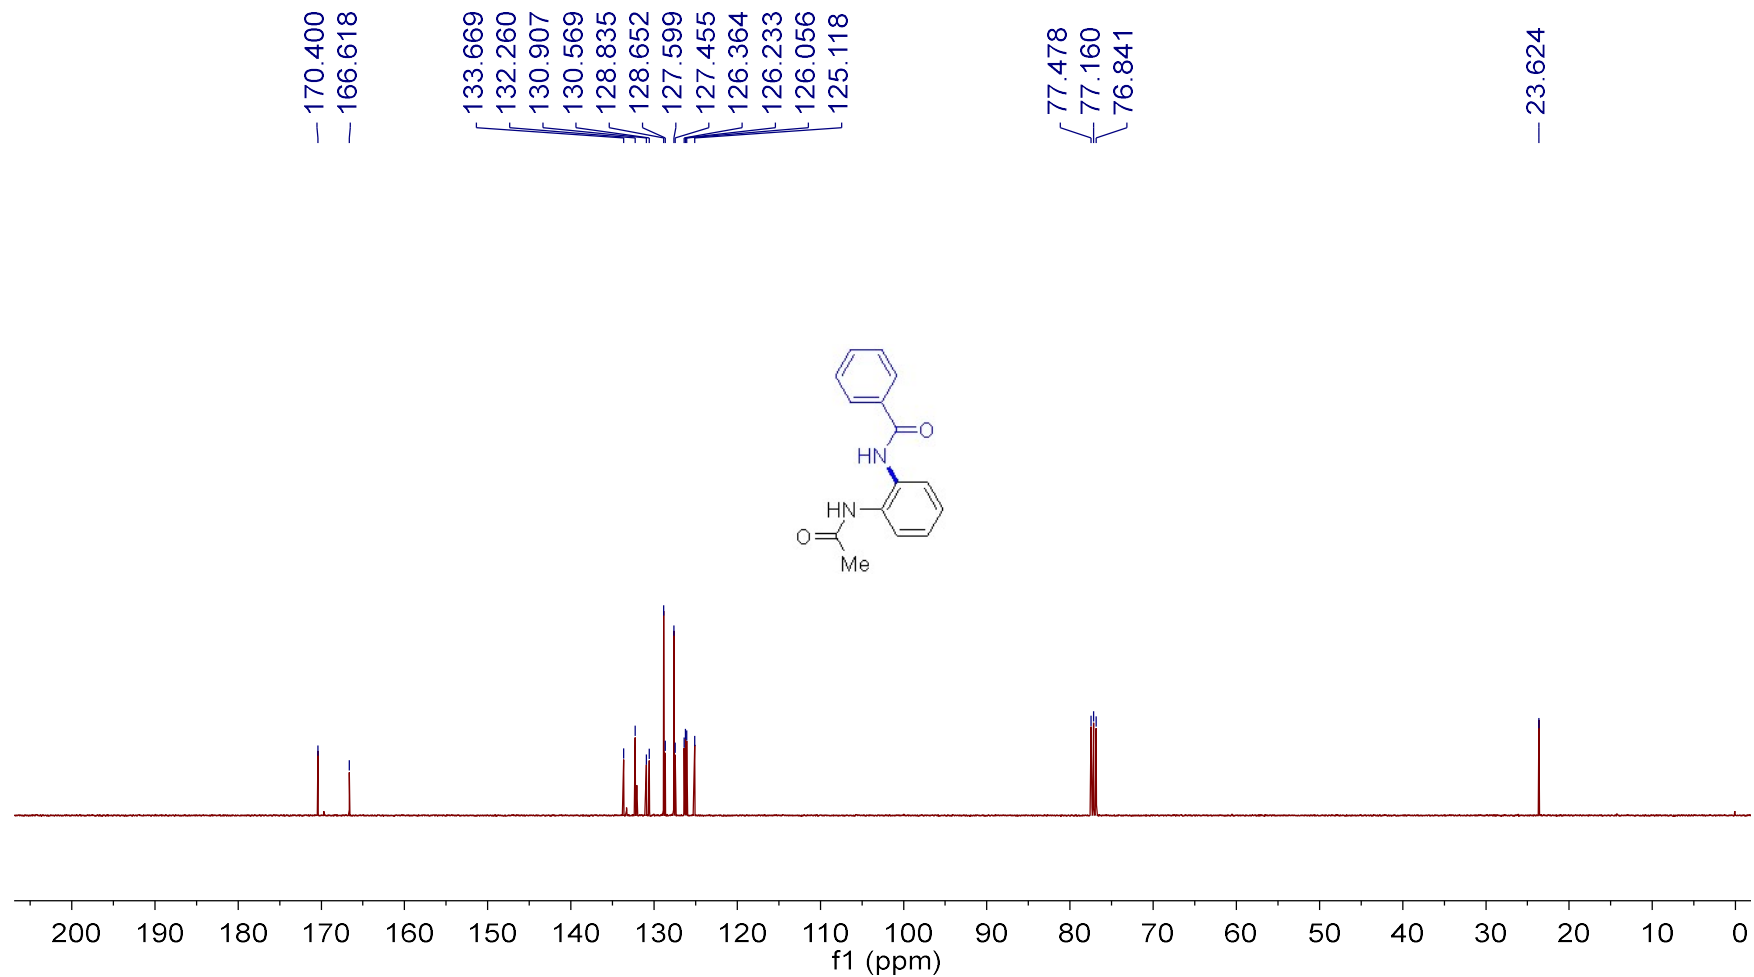

Supplement: d2qo01434c1.pdf [file d2qo01434c1.pdf]
